# Supplementary material for: Overlooked riverine contributions of dissolved neodymium and hafnium to the Amazon estuary and oceans
Source: Nat Commun. 2023 Jul 12;14:4156. doi: 10.1038/s41467-023-39922-3 (PMC10338505; doi:10.1038/s41467-023-39922-3)
Supplement: Supplementary file 4 — Supplementary Data 1 [file 41467_2023_39922_MOESM4_ESM.xlsx]

## Sheet: Table_1
SUPPLEMANTARY DATA FOR
Overlooked riverine contributions of dissolved neodymium and hafnium to the Amazon estuary and oceans
Antao Xu1*, Ed Hathorne1, Georgi Laukert1, 2, 3, Martin Frank1
1 GEOMAR Helmholtz Centre for Ocean Research Kiel, Kiel, Germany
2 Department of Oceanography, Dalhousie University, Halifax, Canada
3 Woods Hole Oceanographic Institution, Woods Hole, USA
* Corresponding author. E-mail address: axu@geomar.de.
Table. 1 Dissolved Nd and Hf isotope compositions and concentrations along with hydrographic parameters
Cruise	Station	Station_ID	LAT	LONG	Sampling date	Depth [m]	T [℃]	S [psu]	143Nd/144Nd	εNd	2SE	2SD	[Nd] [pmol/kg]	176Hf/177Hf	εHf	2SE	2SD	[Hf] [pmol/kg]
M147	25.5	AM01	3.9	-47.6	04-05-18	2	27.91	35.49	0.512056	-11.36	0.09	0.2	25.82	0.282756	-1.02	1.81	1.75	0.41
M147	34	AM02	2.55	-48.44	03-05-18	3	27.67	28.76	0.511934	-13.73	0.1	0.2	28.98	0.282677	-3.81	0.74	1.02	0.54
M147	33	AM03	2.43	-48.5	03-05-18	3	27.31	22.3	0.511937	-13.68	0.09	0.2	34.59	0.282636	-5.27965	0.45	1.02	0.71
M147	32	AM04	2.3	-48.59	03-05-18	4	27.72	16.74	0.512008	-12.3	0.09	0.2	31.76	0.282645	-4.95124	0.51	0.63	1.13
M147	31	AM05	1.46	-49.26	03-05-18	3	27.99	12.89	0.512168	-9.17	0.1	0.2	35.6	0.282835	1.77	0.45	0.91	1.18
M147	30	AM06	1.44	-49.3	03-05-18	3	27.91	6.92	0.512166	-9.2	0.11	0.2	52.24	0.282835	1.78	0.57	1.02	1.47
M147	29	AM07	1.44	-49.29	02-05-18	3	27.86	5.11	0.512128	-9.95	0.12	0.2	104.54	0.282795	0.34	0.73	1.02	2.88
M147	28	AM08	1.44	-49.28	02-05-18	3	27.67	3.2	0.512145	-9.61	0.13	0.2	79.43	0.282823	1.33	2.96	1.43	3.66
M147	27	AM09	1.45	-49.32	02-05-18	3	27.6	1.78	0.512126	-9.98	0.13	0.2	146.62	0.282789	0.13	0.35	0.63	4.78
M147	26	AM10	1.45	-49.33	02-05-18	3	28.02	0.8	0.51215	-9.52	0.15	0.2	307.15	0.282837	1.85	0.42	0.63	7.95
M147	15.5	AM11	0.98	-49.62	02-05-18	2	28.36	0.19	0.512158	-9.37	0.12	0.2	501.89	0.282837	1.83	0.47	0.91	12.32
M147	55.5	AM12	2.3	-47.48	08-05-18	2	27.79	35.5	0.511982	-12.79	0.13	0.2	21.14	0.282677	-3.81	1.49	1.75	0.37
M147	56.5	AM13	2.08	-47.68	08-05-18	2	28.05	30.73	0.511948	-13.45	0.1	0.2	32.17	0.282683	-3.6	0.97	1.16	0.66
M147	64	AM14	1.94	-47.79	08-05-18	3	28.36	26.76	0.512085	-10.78	0.1	0.2	34.64	0.282835	1.76	1.36	2.73	0.71
M147	74	AM15	1.74	-47.97	11-05-18	3	28.13	20.51	0.512034	-11.78	0.12	0.2	29.28	0.28264	-5.14204	0.46	0.74	1.43
M147	75	AM16	1.65	-48.04	11-05-18	3	27.95	15.92	0.512075	-10.99	0.11	0.2	27.92	0.282733	-1.85	0.47	0.74	1.38
M147	78	AM17	1.57	-48.09	11-05-18	3	27.95	12.31	0.512092	-10.64	0.11	0.2	27.55	0.282748	-1.29	0.5	0.63	1.5
M147	79	AM18	1.48	-48.15	11-05-18	3	28.04	9.33	0.512111	-10.28	0.12	0.2	26.14	0.282721	-2.26	0.54	0.63	1.51
M147	72	AM19	0.57	-48	10-05-18	3	28.21	7.01	0.512014	-12.17	0.12	0.2	26.25	0.2827	-2.99	0.56	0.63	2.01
M147	80	AM20	1.27	-48.28	11-05-18	3	28.08	6.58	0.512086	-10.76	0.12	0.2	27.65	0.282811	0.91	0.87	1.43	2.08
M147	71	AM21	0.03	-48.19	10-05-18	2	27.48	3.67	0.512063	-11.21	0.12	0.2	48.95	0.282704	-2.85	0.68	1.02	2.5
M147	69	AM22	0.02	-48.42	09-05-18	2	27.76	1.03	0.512108	-10.34	0.11	0.2	106.08	0.28274	-1.58	0.37	0.74	3.04
M147	70	AM23	0.02	-48.42	09-05-18	3	26.97	0.58	0.512107	-10.37	0.12	0.2	139.42	0.282691	-3.33	0.66	0.63	4.09
M147	66	AM24	0.05	-48.71	09-05-18	2	28.29	0.03	0.512136	-9.8	0.13	0.2	436.44	0.282717	-2.4	0.37	1.02	8.36
M147	2.5	AM25	-0.63	-48.37	29-04-18	2	28.97	0.35	0.511918	-14.05	0.14	0.21	1035.62	0.282669	-4.09	0.37	0.5	13.38
M147	3.5	AM26	-0.48	-48.26	30-04-18	2	28.66	3.15	0.511924	-13.93	0.13	0.23	132.96	0.282682	-3.65	0.46	0.63	3.32
M147	4.5	AM27	-0.42	-48.21	30-04-18	2	28.61	5.78	0.511918	-14.04	0.13	0.23	65.36	0.282645	-4.94	0.7	0.91	2.29
M147	5.5	AM28	-0.4	-48.18	30-04-18	2	28.7	7.81	0.511918	-14.04	0.14	0.23	50.64	0.282683	-3.62	0.97	1.02	1.86
M147	6.5	AM29	-0.37	-48.14	30-04-18	2	28.63	10.06	0.51193	-13.82	0.1	0.22	44.65	0.282665	-4.26	0.64	0.74	1.98
M147	7.5	AM30	-0.18	-47.92	30-04-18	2	28.48	11.39	0.512013	-12.18	0.09	0.21	35.86	0.282685	-3.52	0.49	0.74	1.77
M147	8.5	AM31	0.14	-47.68	30-04-18	2	27.84	18.66	0.511947	-13.48	0.12	0.21	30.62	0.282638	-5.21	0.52	0.91	1.14
M147	100.5	AM36	0.98	-47.72	17-05-18	2	29.23	24.93	0.511959	-13.24	0.11	0.23	29.1	0.282643	-5.02	0.55	0.91	0.75
M147	11.5	AM40	1.9	-46.8	01-05-18	2	28.2	35.4	0.511974	-12.95	0.1	0.22	22.53	0.2827	-3.02	1.77	1.61	0.36
M147	86	AM45	2.67	-49.2	12-05-18	2	27.39	3.52	0.512145	-9.62	0.1	0.24	48.75	0.282757	-1	0.24	0.45	2.44
M147	83	AM46	1.63	-48.59	11-05-18	3	28.13	5.45	0.512134	-9.84	0.1	0.24	85.47	0.282746	-1.37	0.24	0.45	3.12
M147	12.5	AM47	1.56	-49.07	02-05-18	2	27.55	7.84	0.512175	-9.02	0.12	0.24	36.78	0.282855	2.49	1.76	1.43	1.24
M147	13.5	AM65	1.5	-49.22	02-05-18	2	27.84	7.3	0.512152	-9.48	0.1	0.24	40.81	0.282843	2.06	0.68	0.91	1.28
M147	99.5	AM67	2.07	-48.28	17-05-18	2	28.52	25.49	0.51206	-11.27	0.1	0.24	27.62	0.282745	-1.41	0.51	0.91	0.85
M147	91	AM73	4.3	-51	13-05-18	3	26.94	12.4	0.512161	-9.3	0.12	0.21	26.13	0.282949	5.79	0.43	0.63	1.39
M147	90	AM74	3.77	-50.8	12-05-18	3	27	13.04	0.512164	-9.25	0.12	0.21	27.08	0.282843	2.04	0.34	0.63	1.87
M147	87	AM75	2.65	-50.11	12-05-18	3	27.08	13.08	0.512127	-9.96	0.12	0.21	41.17	0.282832	1.67	0.27	0.5	2.62
M147	91.5	AM76	3.5	-50.16	15-05-18	2	27.82	19.53	0.512111	-10.29	0.11	0.21	33.59	0.282778	-0.26	0.33	0.45	2.53
M147	94	AM77	5.09	-51.07	13-05-18	3	27.17	21.21	0.512111	-10.27	0.13	0.21	32.08	0.282739	-1.64	0.42	0.74	1.16
M147	103	AM78	4.45	-50.7	15-05-18	3	28	24.21	0.512109	-10.33	0.13	0.21	51.95	0.282765	-0.72	0.28	0.5	2.73
M147	95.5	AM79	3.05	-49.02	16-05-18	2	28.46	25.67	0.512079	-10.91	0.09	0.21	27.51	0.282718	-2.37	0.99	2.13	0.43
M147	97	AM80	5.99	-51.82	13-05-18	3	27.82	26.18	0.5121	-10.5	0.1	0.21	30.86	0.282761	-0.84	0.54	1.43	0.85
M147	82.5	AM84	6.58	-49.78	14-05-18	2	27.12	35.65	0.512049	-11.49	0.1	0.21	21.21	0.282767	-0.62	1.12	2.03	0.57
M147	100	AM85	6.32	-51.21	14-05-18	4	27.68	35.72	0.512055	-11.38	0.11	0.21	39.25	0.28278	-0.17	0.44	0.5	2.15
* 2 standard deviations as internal (SE) and external (SD) error.

## Sheet: Table_2
SUPPLEMANTARY DATA FOR
Overlooked riverine contributions of dissolved neodymium and hafnium to the Amazon estuary and oceans
Antao Xu1*, Ed Hathorne1, Georgi Laukert1, 2, 3, Martin Frank1
1 GEOMAR Helmholtz Centre for Ocean Research Kiel, Kiel, Germany
2 Department of Oceanography, Dalhousie University, Halifax, Canada
3 Woods Hole Oceanographic Institution, Woods Hole, USA
* Corresponding author. E-mail address: axu@geomar.de.
Table. 2 Removal percentage of Nd and Hf in the Amazon River and Pará River estuaries
Transect	Cruise	Station	Station_ID	Sampling date	Depth [m]	T [℃]	S [psu]	εNd	[Nd] [pmol/kg]	εHf	[Hf] [pmol/kg]	Nd removal percentage	Hf removal percentage
north Amazon transect	M147	15.5	AM11	02-05-18	2	28.36	0.19	-9.37	501.89	1.83	12.32	0	0
	M147	26	AM10	02-05-18	3	28.02	0.8	-9.52	307.15	1.85	7.95	0.378	0.343
	M147	27	AM09	02-05-18	3	27.6	1.78	-9.98	146.62	0.13	4.78	0.695	0.594
	M147	28	AM08	02-05-18	3	27.67	3.2	-9.61	79.43	1.33	3.66	0.828	0.676
	M147	29	AM07	02-05-18	3	27.86	5.11	-9.95	104.54	0.34	2.88	0.76	0.729
	M147	83	AM46	11-05-18	3	28.13	5.45	-9.84	85.47	-1.37	3.12	0.802	0.705
	M147	30	AM06	03-05-18	3	27.91	6.92	-9.2	52.24	1.78	1.47	0.873	0.854
	M147	13.5	AM65	02-05-18	2	27.84	7.3	-9.48	40.81	2.06	1.28	0.899	0.871
	M147	12.5	AM47	02-05-18	2	27.55	7.84	-9.02	36.78	2.49	1.24	0.908	0.873
	M147	31	AM05	03-05-18	3	27.99	12.89	-9.17	35.6	1.77	1.18	0.892	0.853
	M147	32	AM04	03-05-18	4	27.72	16.74	-12.3	31.76	-4.95124	1.13	0.886	0.832
	M147	33	AM03	03-05-18	3	27.31	22.3	-13.68	34.59	-5.27965	0.71	0.83	0.854
	M147	99.5	AM67	17-05-18	2	28.52	25.49	-11.27	27.62	-1.41	0.85	0.828	0.775
	M147	34	AM02	03-05-18	3	27.67	28.76	-13.73	28.98	-3.81	0.54	0.76	0.798
	M147	25.5	AM01	04-05-18	2	27.91	35.49	-11.36	25.82	-1.02	0.41	—	—
south Amazon transect	M147	66	AM24	09-05-18	2	28.29	0.03	-9.8	436.44	-2.4	8.36	0	0
	M147	70	AM23	09-05-18	3	26.97	0.58	-10.37	139.42	-3.33	4.09	0.676	0.504
	M147	69	AM22	09-05-18	2	27.76	1.03	-10.34	106.08	-1.58	3.04	0.75	0.627
	M147	71	AM21	10-05-18	2	27.48	3.67	-11.21	48.95	-2.85	2.5	0.876	0.668
	M147	80	AM20	11-05-18	3	28.08	6.58	-10.76	27.65	0.91	2.08	0.923	0.698
	M147	72	AM19	10-05-18	3	28.21	7.01	-12.17	26.25	-2.99	2.01	0.926	0.704
	M147	79	AM18	11-05-18	3	28.04	9.33	-10.28	26.14	-2.26	1.51	0.92	0.759
	M147	78	AM17	11-05-18	3	27.95	12.31	-10.64	27.55	-1.29	1.5	0.906	0.732
	M147	75	AM16	11-05-18	3	27.95	15.92	-10.99	27.92	-1.85	1.38	0.889	0.712
	M147	74	AM15	11-05-18	3	28.13	20.51	-11.78	29.28	-5.14204	1.43	0.851	0.618
	M147	100.5	AM36	17-05-18	2	29.23	24.93	-13.24	29.1	-5.02	0.75	0.799	0.726
	M147	64	AM14	08-05-18	3	28.36	26.76	-10.78	34.64	1.76	0.71	0.719	0.696
	M147	56.5	AM13	08-05-18	2	28.05	30.73	-13.45	32.17	-3.6	0.66	0.582713	0.547369
	M147	11.5	AM40	01-05-18	2	28.2	35.4	-12.95	22.53	-3.02	0.36	-0.008	0.092
	M147	55.5	AM12	08-05-18	2	27.79	35.5	-12.79	21.14	-3.81	0.37	—	—
Pará transect	M147	2.5	AM25	29-04-18	2	28.97	0.35	-14.05	1035.62	-4.09	13.38	0	0
	M147	3.5	AM26	30-04-18	2	28.66	3.15	-13.93	132.96	-3.65	3.32	0.861	0.731
	M147	4.5	AM27	30-04-18	2	28.61	5.78	-14.04	65.36	-4.94	2.29	0.926	0.799
	M147	5.5	AM28	30-04-18	2	28.7	7.81	-14.04	50.64	-3.62	1.86	0.938	0.825
	M147	6.5	AM29	30-04-18	2	28.63	10.06	-13.82	44.65	-4.26	1.98	0.941	0.798
	M147	7.5	AM30	30-04-18	2	28.48	11.39	-12.18	35.86	-3.52	1.77	0.95	0.81
	M147	8.5	AM31	30-04-18	2	27.84	18.66	-13.48	30.62	-5.21	1.14	0.94	0.824
	M147	25.5	AM01	05-04-18	2	27.91	35.49	-11.36	25.82	-1.02	0.41	—	—
* 2 standard deviations as internal (SE) and external (SD) error.
* % removal percentage = (1-[Nd or Hf]measured / [Nd or Hf]conservative) * 100. [Nd or Hf]measured represents the actual concentration measured and [Nd or Hf]conservative represents the concentration expected from conservative two-endmember mixing for the same salinity

## Sheet: Table_3
SUPPLEMANTARY DATA FOR
Overlooked riverine contributions of dissolved neodymium and hafnium to the Amazon estuary and oceans
Antao Xu1*, Ed Hathorne1, Georgi Laukert1, 2, 3, Martin Frank1
1 GEOMAR Helmholtz Centre for Ocean Research Kiel, Kiel, Germany
2 Department of Oceanography, Dalhousie University, Halifax, Canada
3 Woods Hole Oceanographic Institution, Woods Hole, USA
* Corresponding author. E-mail address: axu@geomar.de.
Table. 3 Dissolved REY concentrations in pmol/kg
Cruise	Station	Station_ID	LAT	LONG	Sampling date	Depth [m]	T [℃]	S [psu]	La	Ce	Pr	Nd	Sm	Eu	Gd	Tb	Dy	Y	Ho	Er	Yb	Lu
M147	25.5	AM01	3.9	-47.6	04-05-18	2	27.91	35.49	27.1923	41.4275	6.66892	27.9228	5.89254	1.52078	7.09538	1.05845	6.18658	138.452	1.54252	4.52872	3.64704	0.577568
M147	34	AM02	2.55	-48.44	03-05-18	3	27.67	28.76	25.5209	29.6166	6.23086	28.0862	6.57372	1.77663	8.84415	1.36739	8.92845	182.729	2.22513	6.71037	5.81788	0.925581
M147	33	AM03	2.43	-48.5	03-05-18	3	27.31	22.3	31.9007	33.907	7.5461	32.4827	7.18794	2.06278	9.97037	1.50901	9.5642	268.712	2.49453	7.65432	6.5903	1.07158
M147	32	AM04	2.3	-48.59	03-05-18	4	27.72	16.74	26.5471	24.0547	6.76831	30.4443	7.27729	2.11424	9.90412	1.57401	9.9056	255.9	2.6056	7.95034	7.05473	1.14335
M147	31	AM05	1.46	-49.26	03-05-18	3	27.99	12.89	34.0049	27.9197	7.08011	34.2499	8.93205	2.50274	13.4306	1.89983	11.702	241.615	2.8297	8.20885	7.3416	1.18553
M147	30	AM06	1.44	-49.3	03-05-18	3	27.91	6.92	45.4309	64.5521	10.3985	48.1509	11.5638	3.3126	15.7314	2.27184	13.1706	282.942	3.27187	9.47268	9.05641	1.49176
M147	29	AM07	1.44	-49.29	02-05-18	3	27.86	5.11	78.4734	165.962	21.065	94.49	22.9584	6.25126	27.7844	3.80232	21.1975	330.474	4.86468	13.8398	12.6791	2.01438
M147	28	AM08	1.44	-49.28	02-05-18	3	27.67	3.2	57.4481	120.012	16.9371	79.6661	19.9974	5.29032	25.0516	3.58189	20.534	264.212	4.566	13.0642	11.6911	1.90691
M147	27	AM09	1.45	-49.32	02-05-18	3	27.6	1.78	99.3844	240.397	29.3385	137.579	34.347	8.85055	38.5929	5.57355	30.2941	421.719	6.67025	18.6035	17.9228	2.62952
M147	26	AM10	1.45	-49.33	02-05-18	3	28.02	0.8	205.268	532.969	61.6587	280.579	71.6837	18.7129	75.9949	10.7007	56.739	657.49	12.2589	33.5863	31.7024	4.49495
M147	15.5	AM11	0.98	-49.62	02-05-18	2	28.36	0.19	287.544	758.198	96.5226	470.054	129.729	34.549	132.837	20.0185	108.019	1113.29	23.1406	61.78	62.5511	8.40036
M147	55.5	AM12	2.3	-47.48	08-05-18	2	27.79	35.5	20.3732	26.7353	4.97328	20.2096	4.03	1.0781	4.82413	0.727932	4.45076	97.511	1.13206	3.46514	2.88641	0.438268
M147	56.5	AM13	2.08	-47.68	08-05-18	2	28.05	30.73	29.6151	41.1412	7.34648	30.8022	6.87654	1.86238	8.81735	1.42483	9.06068	200.202	2.40451	7.65784	6.7465	1.10868
M147	64	AM14	1.94	-47.79	08-05-18	3	28.36	26.76	33.0147	33.7661	7.08404	31.7231	7.65936	2.20497	11.2664	1.78474	11.6145	331.342	3.05866	9.42586	8.10639	1.31818
M147	74	AM15	1.74	-47.97	11-05-18	3	28.13	20.51	28.4443	27.8928	6.27201	28.7671	6.97017	2.04558	10.1687	1.55475	9.83424	283.455	2.63084	7.8698	6.94703	1.11564
M147	75	AM16	1.65	-48.04	11-05-18	3	27.95	15.92	24.6579	28.3865	5.72974	26.2977	6.41371	1.90391	9.22833	1.47252	9.11534	243.505	2.40289	7.24278	6.29708	1.0488
M147	78	AM17	1.57	-48.09	11-05-18	3	27.95	12.31	22.6088	28.4794	5.52884	25.4673	6.61759	1.91332	9.38316	1.49329	9.20425	235.702	2.37514	7.29659	6.31704	1.06416
M147	79	AM18	1.48	-48.15	11-05-18	3	28.04	9.33	19.559	31.1433	5.41913	25.7472	6.94602	2.01984	9.87491	1.54753	9.41995	209.826	2.40192	7.25322	6.05447	0.999289
M147	72	AM19	0.57	-48	10-05-18	3	28.21	7.01	21.3347	30.0197	5.74138	27.421	6.97079	2.09855	10.2403	1.5645	9.74235	177.694	2.50612	7.59041	7.53874	1.22935
M147	80	AM20	1.27	-48.28	11-05-18	3	28.08	6.58	16.893	28.6446	5.1054	24.7749	6.50274	1.88315	8.9611	1.40978	8.54209	152.71	2.14821	6.31317	5.5384	0.90169
M147	71	AM21	0.03	-48.19	10-05-18	2	27.48	3.67	35.4408	67.8407	9.77286	46.6638	12.1972	3.29124	16.2387	2.36418	14.5915	218.628	3.3558	10.0583	9.46326	1.53048
M147	69	AM22	0.02	-48.42	09-05-18	2	27.76	1.03	72.6885	149.911	20.4587	99.6857	25.6542	6.5252	31.7847	4.52452	26.1811	377.268	5.86236	16.6209	15.1893	2.38336
M147	70	AM23	0.02	-48.42	09-05-18	3	26.97	0.58	94.5181	189.604	26.9182	126.584	30.2435	7.61421	38.9614	5.48307	33.2299	453.451	7.64362	22.1711	20.8412	3.35332
M147	66	AM24	0.05	-48.71	09-05-18	2	28.29	0.03	251.85	611.373	83.5433	396.082	103.874	26.6617	128.185	18.4356	104.342	1122.74	22.1789	61.0944	53.1213	8.17081
M147	2.5	AM25	-0.63	-48.37	29-04-18	2	28.97	0.35	683.537	1638.29	224.002	994.465	248.101	61.7515	263.519	37.3418	208.905	1896.66	43.5947	118.434	107.9	15.1602
M147	3.5	AM26	-0.48	-48.26	30-04-18	2	28.66	3.15	106.594	199.31	27.8177	129.419	31.3582	7.71882	37.2599	5.13445	30.2774	386.835	6.87103	19.9299	17.986	2.87413
M147	4.5	AM27	-0.42	-48.21	30-04-18	2	28.61	5.78	64.9363	108.378	13.9929	64.2156	15.4664	4.06651	19.2947	2.81735	16.5639	275.564	3.86148	11.2796	10.5473	1.70033
M147	5.5	AM28	-0.4	-48.18	30-04-18	2	28.7	7.81	53.1827	78.8891	10.8718	48.9018	11.8263	3.12384	15.3346	2.2023	13.5561	231.053	3.20246	9.57492	8.91005	1.44785
M147	6.5	AM29	-0.37	-48.14	30-04-18	2	28.63	10.06	42.5737	57.9176	9.03115	41.3497	10.0921	2.65736	13.0876	1.94248	11.8784	202.492	2.83332	8.57772	8.06764	1.29836
M147	7.5	AM30	-0.18	-47.92	30-04-18	2	28.48	11.39	28.7721	44.0643	7.80159	37.1236	9.936	2.68573	13.6809	2.04326	12.754	197.255	3.02748	9.10846	8.70746	1.43174
M147	8.5	AM31	0.14	-47.68	30-04-18	2	27.84	18.66	28.0947	29.2836	6.34849	28.9873	7.10496	2.02346	10.6636	1.71067	11.4775	301.418	2.98052	9.43854	8.34846	1.35305
M147	100.5	AM36	0.98	-47.72	17-05-18	2	29.23	24.93	26.221	24.9039	5.90686	27.2438	6.40994	1.77665	9.56453	1.4858	10.0634	261.158	2.62737	8.19154	6.76716	1.07294
M147	11.5	AM40	1.9	-46.8	01-05-18	2	28.2	35.4	23.7667	30.7492	5.3369	22.6596	4.86817	1.2833	6.26208	0.912053	5.87848	122.214	1.44881	4.29714	3.36744	0.532208
M147	86	AM45	2.67	-49.2	12-05-18	2	27.39	3.52	27.6636	57.6134	8.43756	42.1517	11.4486	3.04522	15.266	2.29601	14.2054	238.212	3.28109	9.82814	9.42259	1.48192
M147	83	AM46	1.63	-48.59	11-05-18	3	28.13	5.45	48.3626	112.436	15.6274	76.7228	21.3216	5.50822	26.3336	3.95752	23.4477	344.899	5.18476	14.997	13.9303	2.14346
M147	12.5	AM47	1.56	-49.07	02-05-18	2	27.55	7.84	30.4242	41.6221	7.04986	34.5594	9.41226	2.62526	13.0408	1.89187	11.367	211.898	2.66525	7.76033	7.14081	1.14919
M147	13.5	AM65	1.5	-49.22	02-05-18	2	27.84	7.3	29.8313	39.8633	7.7272	38.6536	10.8253	3.02472	14.7473	2.11754	12.5737	232.979	2.92018	8.36404	7.78961	1.25973
M147	99.5	AM67	2.07	-48.28	17-05-18	2	28.52	25.49	24.6085	26.2918	5.51413	25.3836	6.21646	1.8003	9.29206	1.4702	10.0141	316.225	2.62444	8.24991	7.07026	1.14032
M147	91	AM73	4.3	-51	13-05-18	3	26.94	12.4	23.9538	39.9435	5.92659	27.3225	7.03457	2.00287	9.42085	1.40238	8.95834	205.761	2.15796	6.4758	6.01801	0.951646
M147	90	AM74	3.77	-50.8	12-05-18	3	27	13.04	24.9939	36.1339	5.94855	27.72	7.23112	2.06286	9.98182	1.53766	9.95106	249.01	2.47919	7.52448	6.85204	1.12399
M147	87	AM75	2.65	-50.11	12-05-18	3	27.08	13.08	42.7362	54.5773	9.19023	40.3913	9.73684	2.77577	12.8339	1.89105	11.8588	270.699	2.80974	8.43093	7.84552	1.23888
M147	91.5	AM76	3.5	-50.16	15-05-18	2	27.82	19.53	31.5358	53.6861	7.6249	33.7754	8.55277	2.47936	11.3412	1.81345	11.8514	293.981	2.94218	8.98948	8.62192	1.37933
M147	94	AM77	5.09	-51.07	13-05-18	3	27.17	21.21	29.0927	36.9348	6.57065	30.2482	7.60782	2.12575	10.4773	1.61012	10.3258	295.603	2.57775	7.85961	6.57217	1.04699
M147	103	AM78	4.45	-50.7	15-05-18	3	28	24.21	62.5081	110.902	11.6749	47.9432	10.6183	2.98776	13.2112	1.99157	12.6332	375.422	3.11105	9.31311	8.35443	1.2751
M147	95.5	AM79	3.05	-49.02	16-05-18	2	28.46	25.67	22.9945	31.9544	5.4104	25.01	6.05936	1.73369	8.95638	1.41153	9.82746	344.927	2.55768	7.89371	6.64977	1.07786
M147	97	AM80	5.99	-51.82	13-05-18	3	27.82	26.18	26.5954	32.9305	6.05344	27.3048	6.4976	1.82903	8.83482	1.33266	8.65317	238.381	2.15739	6.51271	5.4933	0.861215
M147	82.5	AM84	6.58	-49.78	14-05-18	2	27.12	35.65	20.4858	28.8233	4.84782	20.9728	4.62306	1.21164	5.59383	0.831522	5.29021	123.09	1.28501	3.92107	3.16508	0.484594
M147	100	AM85	6.32	-51.21	14-05-18	4	27.68	35.72	60.2453	113.062	11.3093	41.7608	8.08347	2.02979	7.7419	1.08827	6.48121	130.721	1.49371	4.32528	3.60335	0.538427
SLRS-6 (diluted 20 times)									88.0091	110.937	19.7523	75.4153	13.1697	2.50962	10.7228	1.37264	7.28393	73.4741	1.52493	4.18749	3.89522	0.60583
SLRS-6 2SD	* 2 standard deviations as errors calculated from repeated measurement (n = 5).								7.23714	8.04674	0.848663	2.6494	0.186609	0.0751006	0.754101	0.0857716	0.429166	2.30175	0.112837	0.190262	0.174487	0.0454308
2SD in %									8.22318	7.25341	4.29653	3.51309	1.41696	2.99251	7.0327	6.24866	5.89196	3.13274	7.39951	4.54359	4.47951	7.49894
SLEW-3									56.2396	52.0453	11.5119	59.0258	48.0792	3.79306	19.4778	2.72244	19.0123	453.361	5.23698	15.903	10.8325	1.7384
SLEW-3 2SD	* 2 standard deviations as errors calculated from repeated measurement (n = 7).								3.08068	4.01071	0.72394	4.21111	3.57038	0.282122	1.98077	0.248721	1.85325	37.4526	0.433422	1.41402	0.736811	0.15314
2SD in %									5.47778	7.7062	6.28863	7.13435	7.42604	7.43785	10.1694	9.13596	9.74764	8.26109	8.27619	8.89151	6.80187	8.80921
BATS 15m									14.6095	12.565	3.1853	14.0257	3.1119	0.904997	4.66222	0.76522	5.294	132.67	1.44789	4.61038	4.16201	0.677582
BATS 15m 2SD	* 2 standard deviations as errors calculated from repeated measurement (n = 8).								0.672046	0.869562	0.266386	0.711565	0.103842	0.0378805	0.248479	0.0395347	0.260377	8.76885	0.0666779	0.211507	0.164177	0.0443898
2SD in %									4.60005	6.92052	8.363	5.0733	3.33695	4.18571	5.32963	5.16645	4.91834	6.60953	4.60518	4.58762	3.94466	6.5512
BATS 2000m									23.3777	5.84078	3.9551	16.7315	3.33192	0.902188	4.70966	0.732749	5.24279	142.029	1.43513	4.76965	4.69924	0.803123
BATS 2000m 2SD	* 2 standard deviations as errors calculated from repeated measurement (n = 7).								1.13039	0.692248	0.18929	0.952841	0.249112	0.0647702	0.48354	0.0598925	0.487194	11.1477	0.109642	0.362557	0.243702	0.0411632
2SD in %									4.83534	11.852	4.78598	5.6949	7.47653	7.17924	10.267	8.17366	9.29263	7.84893	7.63989	7.60133	5.18599	5.12539
Blanks (n=4)									0.226338	0.86053	0.0260571	0.0468746	0.0131302	-0.000875352	-0.0195234	-0.0041697	0.013956	0.328685	0.00288944	0.00279197	0.00815198	-0.0016456

## Sheet: Table_4
SUPPLEMANTARY DATA FOR
Overlooked riverine contributions of dissolved neodymium and hafnium to the Amazon estuary and oceans
Antao Xu1*, Ed Hathorne1, Georgi Laukert1, 2, 3, Martin Frank1
1 GEOMAR Helmholtz Centre for Ocean Research Kiel, Kiel, Germany
2 Department of Oceanography, Dalhousie University, Halifax, Canada
3 Woods Hole Oceanographic Institution, Woods Hole, USA
* Corresponding author. E-mail address: axu@geomar.de.
Table. 4 Amazon River, Pará River and Atalntic seawater fractions
Cruise	Station	Station_ID	LAT	LONG	Sampling date	Depth [m]	T [℃]	S [psu]	fAma_Nd	fAtl_Nd	fPará_Nd	Pará riverine Nd fraction	fAma_Hf	fAtl_Hf	fPará_Hf	Pará riverine Hf fraction
M147	25.5	AM01	3.9	-47.6	04-05-18	2	27.91	35.49	0	1	0	0	0	1	0	0
M147	34	AM02	2.55	-48.44	03-05-18	3	27.67	28.76	0.00573385	0.808497	0.18577	0.970059	0	0.806105	0.193895	1
M147	33	AM03	2.43	-48.5	03-05-18	3	27.31	22.3	0.041544	0.624921	0.333535	0.889239	0	0.617994	0.382006	1
M147	32	AM04	2.3	-48.59	03-05-18	4	27.72	16.74	0.290806	0.467934	0.241261	0.453441	0	0.462832	0.537168	1
M147	31	AM05	1.46	-49.26	03-05-18	3	27.99	12.89	0.646367	0.353633	0	0	0.639425	0.35973	0.000845204	0.00132007
M147	30	AM06	1.44	-49.3	03-05-18	3	27.91	6.92	0.812082	0.187918	0	0	0.805239	0.190843	0.00391891	0.00484319
M147	29	AM07	1.44	-49.29	02-05-18	3	27.86	5.11	0.806767	0.139131	0.0541017	0.0628454	0.658651	0.138457	0.202892	0.235498
M147	28	AM08	1.44	-49.28	02-05-18	3	27.67	3.2	0.892412	0.0854206	0.0221675	0.0242379	0.844177	0.0852011	0.0706219	0.0771993
M147	27	AM09	1.45	-49.32	02-05-18	3	27.6	1.78	0.89059	0.0450033	0.0644071	0.0674422	0.696704	0.044121	0.259175	0.271137
M147	26	AM10	1.45	-49.33	02-05-18	3	28.02	0.8	0.967276	0.0174236	0.0153007	0.015572	0.982764	0.0174941	0	0
M147	15.5	AM11	0.98	-49.62	02-05-18	2	28.36	0.19	1	0	0	0	1	0	0	0
M147	55.5	AM12	2.3	-47.48	08-05-18	2	27.79	35.5	0	0.988104	0.0118956	1	0	1	0	0
M147	56.5	AM13	2.08	-47.68	08-05-18	2	28.05	30.73	0.0137906	0.864517	0.121693	0.898212	-0.000235634	0.864453	0.135783	1.00174
M147	64	AM14	1.94	-47.79	08-05-18	3	28.36	26.76	0.207225	0.752659	0.0401158	0.162188	0.253263	0.746737	0	0
M147	74	AM15	1.74	-47.97	11-05-18	3	28.13	20.51	0.27853	0.575155	0.146315	0.344396	0	0.568194	0.431806	1
M147	75	AM16	1.65	-48.04	11-05-18	3	27.95	15.92	0.442557	0.445127	0.112316	0.202417	0.218941	0.44411	0.33695	0.606144
M147	78	AM17	1.57	-48.09	11-05-18	3	27.95	12.31	0.557919	0.343096	0.0989845	0.150683	0.323786	0.342031	0.334183	0.507901
M147	79	AM18	1.48	-48.15	11-05-18	3	28.04	9.33	0.665665	0.258609	0.0757255	0.10214	0.240865	0.256676	0.502459	0.675962
M147	72	AM19	0.57	-48	10-05-18	3	28.21	7.01	0.468099	0.191644	0.340257	0.420925	0.159026	0.190238	0.650736	0.803613
M147	80	AM20	1.27	-48.28	11-05-18	3	28.08	6.58	0.680905	0.180548	0.138547	0.169073	0.70269	0.180647	0.116663	0.142384
M147	71	AM21	0.03	-48.19	10-05-18	2	27.48	3.67	0.687229	0.0978428	0.214928	0.238238	0.201795	0.0956337	0.702571	0.776866
M147	69	AM22	0.02	-48.42	09-05-18	2	27.76	1.03	0.867476	0.023321	0.109203	0.111811	0.434823	0.0213522	0.543825	0.555691
M147	70	AM23	0.02	-48.42	09-05-18	3	26.97	0.58	0.874897	0.0107023	0.114401	0.115638	0.137845	0.00734826	0.854807	0.861134
M147	66	AM24	0.05	-48.71	09-05-18	2	28.29	0.03	0.953719	0	0.0462807	0.0462807	0.302617	0	0.697383	0.697383
M147	2.5	AM25	-0.63	-48.37	29-04-18	2	28.97	0.35	0	0	1	1	0	0	1	1
M147	3.5	AM26	-0.48	-48.26	30-04-18	2	28.66	3.15	0.0447433	0.080126	0.875131	0.951359	0.0728414	0.0802539	0.846905	0.920803
M147	4.5	AM27	-0.42	-48.21	30-04-18	2	28.61	5.78	9.05648e-05	0.154626	0.845284	0.999893	0	0.1542	0.8458	1
M147	5.5	AM28	-0.4	-48.18	30-04-18	2	28.7	7.81	0	0.211504	0.788496	1	0.0646152	0.212592	0.722793	0.917939
M147	6.5	AM29	-0.37	-48.14	30-04-18	2	28.63	10.06	0.0621295	0.27685	0.661021	0.914085	0	0.275227	0.724773	1
M147	7.5	AM30	-0.18	-47.92	30-04-18	2	28.48	11.39	0.393019	0.316124	0.290857	0.425307	0.0665358	0.314639	0.618826	0.902919
M147	8.5	AM31	0.14	-47.68	30-04-18	2	27.84	18.66	0.0959844	0.521639	0.382377	0.799347	0	0.516498	0.483502	1
M147	100.5	AM36	0.98	-47.72	17-05-18	2	29.23	24.93	0.0777963	0.699864	0.222339	0.740796	0	0.691081	0.308919	1
M147	11.5	AM40	1.9	-46.8	01-05-18	2	28.2	35.4	0	0.984696	0.0153045	1	0	1	0	0
M147	86	AM45	2.67	-49.2	12-05-18	2	27.39	3.52	0.882872	0.0944736	0.0226548	0.0250184	0.492621	0.0926977	0.414681	0.457049
M147	83	AM46	1.63	-48.59	11-05-18	3	28.13	5.45	0.809138	0.148865	0.0419976	0.0493431	0.409706	0.147047	0.443247	0.519661
M147	12.5	AM47	1.56	-49.07	02-05-18	2	27.55	7.84	0.789331	0.210669	0	0	0.783864	0.216136	0	0
M147	13.5	AM65	1.5	-49.22	02-05-18	2	27.84	7.3	0.791972	0.201491	0.00653674	0.00818618	0.799064	0.200936	0	0
M147	99.5	AM67	2.07	-48.28	17-05-18	2	28.52	25.49	0.21353	0.716453	0.0700169	0.246933	0.132641	0.716085	0.151273	0.532813
M147	91	AM73	4.3	-51	13-05-18	3	26.94	12.4	0.656929	0.343071	0	0	—	—	—	0
M147	90	AM74	3.77	-50.8	12-05-18	3	27	13.04	0.640104	0.359896	0	0	0.637762	0.362238	0	0
M147	87	AM75	2.65	-50.11	12-05-18	3	27.08	13.08	0.596479	0.365017	0.0385048	0.060639	0.624201	0.365143	0.0106561	0.016785
M147	91.5	AM76	3.5	-50.16	15-05-18	2	27.82	19.53	0.408233	0.547625	0.0441427	0.0975797	0.303294	0.547147	0.149559	0.330259
M147	94	AM77	5.09	-51.07	13-05-18	3	27.17	21.21	0.366621	0.595268	0.0381111	0.0941637	0.173777	0.59439	0.231833	0.571567
M147	103	AM78	4.45	-50.7	15-05-18	3	28	24.21	0.28855	0.680273	0.0311776	0.097513	0.189525	0.679822	0.130652	0.408062
M147	95.5	AM79	3.05	-49.02	16-05-18	2	28.46	25.67	0.226963	0.721585	0.0514519	0.184803	0.0805294	0.720919	0.198552	0.711448
M147	97	AM80	5.99	-51.82	13-05-18	3	27.82	26.18	0.232305	0.736165	0.0315292	0.119504	0.1513	0.735797	0.112903	0.427335
M147	82.5	AM84	6.58	-49.78	14-05-18	2	27.12	35.65	0	1	0	0	0	1	0	0
M147	100	AM85	6.32	-51.21	14-05-18	4	27.68	35.72	0	1	0	0	-1.56331e-05	1	0	0
* fPará,fAma and fAtl are calculated based on three-endmember Nd and Hf isotope mixing
** Pará riverine Nd or Hf fraction= fPará/(fPará+fAma)

## Sheet: Table_5
SUPPLEMANTARY DATA FOR
Overlooked riverine contributions of dissolved neodymium and hafnium to the Amazon estuary and oceans
Antao Xu1*, Ed Hathorne1, Georgi Laukert1, 2, 3, Martin Frank1
1 GEOMAR Helmholtz Centre for Ocean Research Kiel, Kiel, Germany
2 Department of Oceanography, Dalhousie University, Halifax, Canada
3 Woods Hole Oceanographic Institution, Woods Hole, USA
* Corresponding author. E-mail address: axu@geomar.de.
Table. 5 Nd isotope compositions of Fe–Mn oxyhydroxide and residual suspended particulate matter
Cruise	Station	Station_ID	LAT	LONG	Sampling date	Depth [m]	T [℃]	S [psu]	143Nd/144Nd	εNd	2SE	2SD	143Nd/144Nd	εNd	2SE	2SD	Origin
									Labile Fe–Mn oxyhydroxide				Residual suspended particulate matter
M147	31	AM05	1.46	-49.26	03-05-18	3	27.99	12.89	0.512211	-8.32848	0.0659137	0.179443	0.512031	-11.8382	0.0830841	0.214582	Amazon
M147	30	AM06	1.44	-49.3	03-05-18	3	27.91	6.92	0.512206	-8.42093	0.0748097	0.179443	0.512031	-11.8449	0.0905275	0.214582	Amazon
M147	29	AM07	1.44	-49.29	02-05-18	3	27.86	5.11	0.512209	-8.36985	0.0770604	0.179443	0.512031	-11.84	0.0909138	0.214582	Amazon
M147	28	AM08	1.44	-49.28	02-05-18	3	27.67	3.2	0.512211	-8.33501	0.0765536	0.179443	0.512033	-11.8072	0.0914049	0.214582	Amazon
M147	27	AM09	1.45	-49.32	02-05-18	3	27.6	1.78	0.512221	-8.13293	0.0781002	0.179443	0.512034	-11.7862	0.089202	0.214582	Amazon
M147	8	AM32	-0.17429	-47.9235	30-04-18	15.7076	28.6151	20.3065	0.512094	-10.6024	0.104887	0.179443	0.511991	-12.6176	0.0816698	0.214582	Pará
M147	8	AM34	-0.17432	-47.9234	30-04-18	20.0759	28.6764	24.1033	0.512096	-10.5785	0.113794	0.179443	0.511987	-12.6936	0.0936801	0.214582	Pará
* 2 standard deviations as internal (SE) and external (SD) error.

## Sheet: Table_6
SUPPLEMANTARY DATA FOR
Overlooked riverine contributions of dissolved neodymium and hafnium to the Amazon estuary and oceans
Antao Xu1*, Ed Hathorne1, Georgi Laukert1, 2, 3, Martin Frank1
1 GEOMAR Helmholtz Centre for Ocean Research Kiel, Kiel, Germany
2 Department of Oceanography, Dalhousie University, Halifax, Canada
3 Woods Hole Oceanographic Institution, Woods Hole, USA
* Corresponding author. E-mail address: axu@geomar.de.
Table. 6 Nd and Hf isotope compositions of secondary standard solution and reference materials for checking the external reproducibility
Name	143Nd/144Nd	2SD	eNd	2SD in eNd	176Hf/177Hf	2SD	eHf	2SD in eHf
NIST 3135a standard (n=13)	0.512447	1.0128e-05	-3.71997	0.197567					Seawater measurement
NIST 3135a standard (n=11)	0.512448	1.04869e-05	-3.70169	0.204567
NIST 3135a standard (n=8)	0.512446	1.06407e-05	-3.74723	0.207567
NIST 3135a standard (n=12)	0.512445	1.14852e-05	-3.77115	0.224041
NIST 3135a standard (n=9)	0.512445	1.17907e-05	-3.76242	0.23
NIST 3135a standard (n=9)	0.512449	1.25263e-05	-3.69514	0.24435
USGS NOD-A-1 (n=20)	0.512154	1.13746e-05	-9.44681	0.221884
Inorganic Ventures CGHF1 standard (n=8)					0.282132	5.84393e-06	-23.0969	0.206656
Inorganic Ventures CGHF1 standard (n=12)					0.282132	1.2752e-05	-23.0994	0.450942
Inorganic Ventures CGHF1 standard (n=12)					0.282134	1.78656e-05	-23.006	0.631772
Inorganic Ventures CGHF1 standard (n=9)					0.282133	2.09837e-05	-23.0738	0.742038
Inorganic Ventures CGHF1 standard (n=9)					0.282132	2.57567e-05	-23.0803	0.910821
Inorganic Ventures CGHF1 standard (n=12)					0.282131	2.89038e-05	-23.1096	1.02211
Inorganic Ventures CGHF1 standard (n=12)					0.282137	3.26721e-05	-22.931	1.15537
Inorganic Ventures CGHF1 standard (n=15)					0.282133	4.0482e-05	-23.0471	1.43155
Inorganic Ventures CGHF1 standard (n=4)					0.282132	4.55996e-05	-23.0856	1.61252
Inorganic Ventures CGHF1 standard (n=7)					0.282132	4.94915e-05	-23.0962	1.75015
Inorganic Ventures CGHF1 standard (n=6)					0.282132	6.07787e-05	-23.0936	2.14929
Inorganic Ventures CGHF1 standard (n=5)					0.28213	7.71844e-05	-23.173	2.72944
USGS NOD-A-1 (n=52)					0.282854	1.90586e-05	2.44572	0.673959
NIST 3135a standard (n=14)	0.512444	9.11642e-06	-3.79187	0.177834					Particle measurement
NIST 3135a standard (n=14)	0.512443	1.06543e-05	-3.79679	0.207834
USGS NOD-A-1 (n=6)	0.512153	5.27767e-06	-9.45258	0.102951
Reference material MESS-2 (labile Fe–Mn oxyhydroxide phase) (n=3)	0.512129	5.71932e-06	-9.92827	0.111566
Reference material MESS-2 (Fe–Mn oxyhydroxide phase) (n=3)	0.512166	7.3598e-06	-9.19989	0.143567
USGS AGV-2 (n=6)	0.512797	9.29265e-06	3.09716	0.181271
USGS BHVO-2 (n=6)	0.512988	4.03982e-06	6.83264	0.0788045
Reference material MESS-2 ( bulk) (n=3)	0.511881	8.76592e-06	-14.7741	0.170996
* 2 standard deviations as external (SD) error.
