# Supplementary material for: Overlooked riverine contributions of dissolved neodymium and hafnium to the Amazon estuary and oceans
Source: Nat Commun. 2023 Jul 12;14:4156. doi: 10.1038/s41467-023-39922-3 (PMC10338505; doi:10.1038/s41467-023-39922-3)
Supplement: Supplementary file 5 — Supplementary Data 2 [file 41467_2023_39922_MOESM5_ESM.xlsx]

## Sheet: Table_1
SUPPLEMANTARY DATA FOR
Overlooked riverine contributions of dissolved neodymium and hafnium to the Amazon estuary and oceans
Antao Xu1*, Ed Hathorne1, Georgi Laukert1, 2, 3, Martin Frank1
1 GEOMAR Helmholtz Centre for Ocean Research Kiel, Kiel, Germany
2 Department of Oceanography, Dalhousie University, Halifax, Canada
3 Woods Hole Oceanographic Institution, Woods Hole, USA
* Corresponding author. E-mail address: axu@geomar.de.
Table. 1 Riverine dissolved Nd concentration and pH data
Rivers	Time series		Average	River discharge	weight	References	pH	References
	pmol/kg	pmol/kg	pmol/kg	m3/s
Amazon			682.926	206000	15.4771	Goldstein and Jacobsen, 1988; Elderfield et al., 1990; Sholkovitz, 1993; Rousseau et al., 2015; Merschel et al., 2017; This study	6.9	Rousseau et al., 2015
Avon			233.635	7.9275	0.000595605	Goldstein and Jacobsen, 1987	8.4	Goldstein and Jacobsen, 1987
Bear			61.4939	63.42	0.00476484	Goldstein and Jacobsen, 1987	8.32	Goldstein and Jacobsen, 1987
Bruneau			375.064	12.684	0.000952968	Goldstein and Jacobsen, 1987	8.18	Goldstein and Jacobsen, 1987
Changjiang*			182.397	29934.2	2.249	Che et al., 2022	7.9	Zhai et al., 2007
Chao Phraya			89.4791	400	0.0300526	Nozaki et al., 2000	7.5	Kulthanan et al., 2013
Colorado			41.5968	412.23	0.0309715	Goldstein and Jacobsen, 1987	7.97	Goldstein and Jacobsen, 1987
Columbia*	139.349	159.454	149.402	7990.92	0.60037	Keasler and Loveland, 1982; Goldstein and Jacobsen, 1987	8.03	Goldstein and Jacobsen, 1987
Congo			2913.96	42800	3.21563	Rahlf et al., 2021	6.2	Wang et al., 2013
Connecticut	2239.97	2709.96	2474.97	560	0.0420736	Elderfield et al., 1990	7.16	Sun et al., 2019
Delaware	123.998	231.997	177.998	356	0.0267468	Elderfield et al., 1990	7.71	Shi et al., 1998
Elimbah Creek			711.59	5	0.000375657	Lawrence and Kamber, 2006	6.34	Lawrence and Kamber, 2006
Fly			180.253	6500	0.488355	Sholkovitz and Szymczak, 2000	7.9	Ferguson et al., 2011
Fraser River, Can.*	305.043	609.393	457.218	4566.24	0.343068	Keasler and Loveland, 1982; Cameron et al., 1995	7.15	Keasler and Loveland, 1982
Garonne River, Fr.			263.446	540	0.040571	Gaillardet et al., 2003	7.81	Etchanchu and Probst, 1988
Gironde			262.676	1000	0.0751315	Martin et al., 1976	7.9	Masson et al., 2007
Great Whale			1157.78	1204.98	0.0905319	Goldstein and Jacobsen, 1987	6.8	Goldstein and Jacobsen, 1987
Hudson River	422.994	727.943	575.469	585	0.0439519	Goldstein and Jacobsen, 1987; Sholkovitz, 1995; Wall et al., 2008	6.9	Goldstein and Jacobsen, 1987
Indin River, Can.			630.884	8	0.000601052	Gaillardet et al., 2003	6.7	Gaillardet et al., 2003
Indus*			22.1849	3297.84	0.247772	Goldstein and Jacobsen, 1987	7.8	Rahman and Chughtai, 2014
Kolyma			128.998	3741.78	0.281125	Porcelli et al., 2009	7.75	Denfeld et al., 2013
Lena	678.991	743.99	711.49	16838	1.26506	Laukert et al., 2017	7.2	HÖlemann et al., 2005
Mackenzie*			110.998	9195.9	0.690902	Zimmermann et al., 2009	8.1	Gaillardet et al., 2003
Manning			110.925	285.39	0.0214418	Goldstein and Jacobsen, 1987	7.6	Goldstein and Jacobsen, 1987
Mississippi	34.8495	79.9989	57.4242	19343.1	1.45328	Goldstein and Jacobsen, 1987; Sholkovitz, 1995	8.05	Goldstein and Jacobsen, 1987
Missouri			159.454	2251.41	0.169152	Goldstein and Jacobsen, 1987	7.92	Goldstein and Jacobsen, 1987
Mistassini, Can.			3792.24	195	0.0146506	Gaillardet et al., 2003	5.5	Gaillardet et al., 2003
Murchison			94.286	10.4643	0.000786198	Goldstein and Jacobsen, 1987	9.5	Goldstein and Jacobsen, 1987
Murray			105.378	1014.72	0.0762374	Goldstein and Jacobsen, 1987	8.02	Goldstein and Jacobsen, 1987
Niger*			589.287	6120.03	0.459807	Picouet et al., 2002	6.97	Picouet et al., 2002
Nyong			3284.7	340	0.0255447	Viers et al., 2000	5.72	Viers et al., 2000
Ob			2151.97	13064.5	0.981557	Zimmermann et al., 2009	6.78	Makkaveev et al., 2001
Ohio			56.7796	5137.02	0.385952	Goldstein and Jacobsen, 1987	7.85	Goldstein and Jacobsen, 1987
Orinoco*	41.8047	4527.11	2284.46	35800.6	2.68975	Mora et al., 2020	6.5	Mora et al., 2020
Ottawa			1830.26	1553.79	0.116739	Goldstein and Jacobsen, 1987	7.07	Goldstein and Jacobsen, 1987
Pará			1035.59	20946	1.5737	This study	6.9	The pH of the Pará River was assumed to be equivalent to that of the Amazon River in this study due to the lack of available data
Parana			1763.7	18011.3	1.35321	Campodonico et al., 2015	7.16	Campodonico et al., 2015
Peel, Can.			27.7312	690	0.0518407	Gaillardet et al., 2003	8.1	Gaillardet et al., 2003
Rivers in West Greenland			2285.74	1.9026	0.000142945	Goldstein and Jacobsen, 1987
Sanaga*	559.992	1568.89	1064.44	3139.29	0.23586	Viers et al., 1997; Deberdt et al., 2002	7.25	Deberdt et al., 2002
Seine at Paris, Fr.			207.984	260	0.0195342	Gaillardet et al., 2003	8	Marescaux et al., 2018
Sepik			249.581	3900.33	0.293038	Sholkovitz and Szymczak, 2000	7.3	Rousseau et al., 2015
Shinano, Jpn.			344.56	697.62	0.0524132	Goldstein and Jacobsen, 1987	7.11	Goldstein and Jacobsen, 1987
Skeena, Can.			561.556	962	0.0722765	Gaillardet et al., 2003	7.5	Gaillardet et al., 2003
Small boreal rivers in NW Russia			532.46	206.435	0.0155098	Pokrovsky and Schott, 2002	6.6	Pokrovsky and Schott, 2002
Snake			231.555	1553.79	0.116739	Goldstein and Jacobsen, 1987	7.88	Goldstein and Jacobsen, 1987
St. Louis			1636.14	63.42	0.00476484	Goldstein and Jacobsen, 1987	7.4	Goldstein and Jacobsen, 1987
Tamar	245.247	790.239	517.743	22.927	0.00172254	Elderfield et al., 1990	7.52	Elderfield et al., 1990
Tennessee			59.0674	1807.47	0.135798	Goldstein and Jacobsen, 1987	8.92	Goldstein and Jacobsen, 1987
Global river discharge				1331000		Goldstein and Jacobsen, 1987
Discharge-weighted mean				996.958	pmol/kg
						*River discharge based on Dai and Trenberth, 2002

## Sheet: Table_2
SUPPLEMANTARY DATA FOR
Overlooked riverine contributions of dissolved neodymium and hafnium to the Amazon estuary and oceans
Antao Xu1*, Ed Hathorne1, Georgi Laukert1, 2, 3, Martin Frank1
1 GEOMAR Helmholtz Centre for Ocean Research Kiel, Kiel, Germany
2 Department of Oceanography, Dalhousie University, Halifax, Canada
3 Woods Hole Oceanographic Institution, Woods Hole, USA
* Corresponding author. E-mail address: axu@geomar.de.
Table. 2 Global riverine dissolved Nd concentration predicted by pH data from global datasets
NO.	River	Station	Country	Latitude	Longitude	Discharge (m3/s)	pH_site	pH_Latitude	pH_Longitude	pH	SD	pH_data source	Nd_conc_predicted (pmol/kg)	weight
1	Amazon River	Obidos - Porto	BR	-1.9472	-55.5111	169184	Obidos	-1.93547	-55.519	6.79273	0.211144	GLORICH	851.41	12.7111
2	Congo River	Brazzaville	CG	-4.27	15.32	41126	Rio Congo at Congo 脿 Beach Brazzaville	-4.28514	15.3008	6.42	0.0653982	GLORICH	1413.47	3.08985
3	Rio Orinoco	Puente Angostura	VE	8.15	-63.6	31208.5	Rio Orinoco at Ciudad Bolivar	8.14409	-63.6074	6.64265	0.323103	GLORICH	1044.2	2.34474
4	Yangtze River	Datong	CN	30.77	117.62	25069.3	Yangtze River - Nantong	32	120.85	7.57236	0.363944	GEMSTAT	294.886	1.88349
5	Brahmaputra River	Bahadurabad	BD	25.18	89.67	23833.2	Brahmaputra River	25.1833	89.6667	7.19213	0.235493	GEMSTAT	494.578	1.79063
6	Yenisey	Igarka	RU	67.43	86.48	19251.3	Yenisey River	67.4467	86.5019	7.34412	0.289267	GEMSTAT	402.222	1.44638
7	Mississippi River	Vicksburg, Ms	US	32.315	-90.9058	17814.6	MISSISSIPPI RIVER AT VICKSBURG, MS	32.3147	-90.9061	7.67237	0.391837	GLORICH	257.387	1.33844
8	Rio Parana	Isla Pati (Brazo Prinzipal)	AR	-29.48	-59.58	17160.3	R铆o Paran谩 Min铆	-29.0851	-59.406	7.455	0.205061	GLORICH	345.918	1.28928
9	Lena	Kyusyur (Kusur)	RU	70.68	127.39	17037.4	Lena River - Stolb	72.3333	126.667	7.65887	0.329867	GEMSTAT	262.155	1.28004
10	Mekong River	Stung Treng	KH	13.533	105.945	13208.5	Mekong River - My Thuan	10.2797	105.905	7.0785	0.314741	GEMSTAT	577.228	0.992373
11	Ob'	Salekhard	RU	66.63	66.6	12883.8	Ob	66.6065	66.5469	7.44388	0.453644	GLORICH	351.188	0.967976
12	Ganges River	Paksey	BD	24.08	89.03	12147	Lower Ganges River - At Padha	24.0833	89.0333	7.34304	0.369761	GEMSTAT	402.814	0.912622
13	Rio Tocantins	Itupiranga	BR	-5.1281	-49.3242	11577	Tocantins River - Station 3	-3.44667	-49.6053	5	0.447214	GEMSTAT	9749.81	0.869799
14	Rio Tapajos	Jatoba	BR	-5.1525	-56.8539	10772.7	JATOBÁ	-5.15293	-56.8393	5.22391	0.795315	GLORICH	7190.25	0.809367
15	Amur River	Bogorodskoye	RU	52.53	140.47	10301.6	Amur River	52.3672	140.428	6.95621	0.316183	GEMSTAT	681.677	0.773974
16	Mackenzie River	Arctic Red River	CA	67.4583	-133.745	9229.51	Mackenzie River	67.4583	-133.7	7.76963	0.359735	GEMSTAT	225.497	0.693427
17	Saint Lawrence River	Lasalle	CA	45.415	-73.6236	8527.63	ST. LAWRENCE R AT CORNWALL ONT NR MASSENA NY	45.0021	-74.7979	7.92193	0.373015	GLORICH	183.311	0.640694
18	Rio Xingu	Altamira	BR	-3.2147	-52.2122	8043.4	ALTAMIRA	-3.231	-52.1815	6.30625	0.700775	GLORICH	1649.95	0.604313
19	Columbia River	Beaver Army Terminal Near Quincy, Or	US	46.1815	-123.184	6696.6	Columbia River - Beaver Army Terminal	46.1814	-123.182	7.76733	0.268602	GEMSTAT	226.202	0.503125
20	Yukon River	Pilot Station, Ak	US	61.9337	-162.883	6605.04	YUKON R AT PILOT STATION AK	61.9117	-162.86	7.6186	0.395716	GLORICH	276.912	0.496246
21	Xi Jiang	Wuzhou 3	CN	23.48	111.3	5291.28	Pearl River (Zhu Jiang)	23.0692	112.45	8.01631	0.200624	GEMSTAT	161.229	0.397542
22	Uruguay River	Concordia	AR	-31.4	-58.02	5220.47	NA	-31.3848	-57.9809	7.06316	0.31829	GLORICH	589.402	0.392222
23	River Niger	Lokoja	NG	7.8	6.7667	5039.86	Niger River - Upstream Bamako (Kenierob)	12.1	-8.31667	6.72222	0.562978	GEMSTAT	937.091	0.378652
24	Pechora	Oksino	RU	67.58	52.17	4834.48	Pechora River	67.5833	52.1753	7.15067	0.325572	GEMSTAT	523.265	0.363222
25	Nelson River	Kettle Generating Station	CA	56.3803	-94.6339	3534.1	Nelson River - Kettle Crossing	56.3831	-94.5831	7.83032	0.19561	GEMSTAT	207.631	0.265522
26	Kolyma	Kolymskaya	RU	68.73	158.72	3305.22	Kolyma River	68.7189	158.799	7.20635	0.306368	GEMSTAT	485.106	0.248326
27	Severnaya Dvina	Ust'-Pinega	RU	64.13	41.92	3236.88	Severnaya Dvina River	64.1431	41.9222	7.65917	0.344136	GEMSTAT	262.05	0.243192
28	Godavari River	Polavaram	IN	16.92	81.78	3073.76	Godavari River - Near Polavaram	17.25	81.6667	7.83419	0.467879	GEMSTAT	206.541	0.230936
29	Indus River	Kotri	PK	25.37	68.37	2887.63	Indus River - At Kotri	25.23	68.3117	7.39713	0.125406	GEMSTAT	374.245	0.216952
30	Rio Sao Francisco	Traipu	BR	-9.98333	-36.9833	2825.37	TRAIPU	-9.97704	-36.9981	6.56	0.848372	GLORICH	1168.41	0.212274
31	Tonle Basak	Chau Doc	VN	10.7067	105.133	2807.65	Mekong River - Chau Doc	10.7	105.157	7.2913	0.360932	GEMSTAT	432.177	0.210943
32	Nile River	Aswan Dam	EG	23.96	32.9	2763.98	Nile at Aswan dam	24.0855	32.8809	7.5	0.424264	GLORICH	325.383	0.207662
33	Fraser River	Hope	CA	49.3806	-121.451	2720.33	Fraser River (Main Arm) At Gravesend Reach - Buoy	49.1485	-123.039	7.72529	0.159919	GEMSTAT	239.512	0.204382
34	Purari River	Wabo Dam Site	PG	-7	145.07	2457.07	Purari River - At Wabo	-6.99389	145.058	7.6	NA	GEMSTAT	284.008	0.184603
35	Neva	Novosaratovka	RU	59.8372	30.5294	2444.36	Neva River	59.8333	30.5	7.22463	0.232324	GEMSTAT	473.195	0.183648
36	Rhine River	Lobith	NL	51.84	6.11	2214.14	RHEIN at BIMMEN	51.8647	6.06765	7.58823	0.373523	GLORICH	288.59	0.166351
37	Usumacinta	Boca Del Cerro	MX	17.4333	-91.4833	1930.63	Rio Usumacinta 1	17.4258	-91.4924	7.8241	0.223215	GEMSTAT	209.395	0.145051
38	Ottawa River	Au Barrage De Carillon	CA	45.57	-74.3928	1928.64	Nord	45.6209	-74.3723	8.3	NA	GLORICH	109.618	0.144901
39	Maroni River	Langa Tabbetje	SR	5	-54.4	1895.34	Rio Maroni at Langa Tabiki	4.9862	-54.4441	6.34978	0.429508	GLORICH	1555.11	0.1424
40	Mahanadi River	Kaimundi	IN	20.42	83.67	1895.14	Mahandi River - At Cuttack (Stn 1278)	20.4667	85.8333	7.7891	0.369753	GEMSTAT	219.603	0.142385
41	Copper River	Million Dollar Bridge Near Cordova, Ak.	US	60.6711	-144.747	1851.82	COPPER R AT MILLION DOLLAR BRIDGE NR CORDOVA AK	60.663	-144.741	8.37826	0.279539	GLORICH	98.5504	0.13913
42	Churchill River	Above Upper Muskrat Falls	CA	53.2478	-60.7892	1751.03	CHURCHILL RIVER ABOVE UPPER MUSKRAT FALLS	53.2519	-60.788	6.74721	0.327656	GLORICH	905.784	0.131557
43	Krishna	Vijayawada	IN	16.52	80.62	1656.43	Krishna River - Near Vijayawada	16.5167	80.6167	8.09619	0.363788	GEMSTAT	144.63	0.12445
44	Rhone	Beaucaire	FR	43.92	4.67	1652.92	Rh么ne 脿 Aramon, Pont d'Aramon D 402	43.8978	4.70217	8.04926	0.144163	GLORICH	154.162	0.124187
45	Rio Jacui	Passo Do Raso	BR	-29.9667	-51.45	1593.94	Jacui River - Ja 042	-29.9411	-51.6806	6.89516	0.324632	GEMSTAT	740.691	0.119755
46	Stikine River	Near Wrangell	CA	56.7077	-132.132	1588.32	STIKINE R NR WRANGELL AK	56.7064	-132.128	7.74156	0.424683	GLORICH	234.272	0.119333
47	Indigirka	Vorontsovo	RU	69.58	147.35	1587.24	Indigirkabl.B.Ercha	69.58	147.58	7.5	NA	GLORICH	325.383	0.119252
48	Fiume Po	Pontelagoscuro	IT	44.8833	11.6	1538.62	Po River - At Pontelagoscuro	44.8875	11.6167	7.90566	0.235585	GEMSTAT	187.412	0.115598
49	Saguenay River	Centrale D'Isle Maligne	CA	48.5772	-71.6353	1459.15	Saguenay	48.432	-71.047	6.96	NA	GLORICH	678.173	0.109628
50	Susitna River	Susitna Station Ak	US	61.5442	-150.515	1426.72	SUSITNA R AT SUSITNA STATION AK	61.5491	-150.521	7.58289	0.419964	GLORICH	290.693	0.107192
51	Yellow River	Shanxian	CN	34.82	111.15	1351.68	Yellow River - Lijin	37.5	118.233	8.10615	0.102965	GEMSTAT	142.684	0.101554
52	Alsek River	Dry Bay Near Yakutat, Ak	US	59.1906	-138.327	1330.17	Alsek River upstream Bates River	60.1195	-137.982	7.98868	0.346711	GLORICH	167.403	0.099938
53	Narmada	Garudeshwar	IN	21.92	73.65	1222.86	Garudeshwar	21.8859	73.6452	7.875	0.485627	GLORICH	195.391	0.0918756
54	Susquehanna River	Conowingo, Md	US	39.6573	-76.175	1167.15	SUSQUEHANNA RIVER AT CONOWINGO, MD	39.6603	-76.1728	7.51085	0.371694	GLORICH	320.617	0.0876901
55	Yana	Ubileynaya	RU	70.75	136.08	1106.87	Yana,154kmfrommouth	70.8	136.21	7.85	NA	GLORICH	202.149	0.0831606
56	Rio Jari	Sao Francisco	BR	-0.5678	-52.5692	1093.85	S脙O FRANCISCO	-0.572414	-52.5692	5.99436	0.910155	GLORICH	2521.68	0.0821826
57	Rio Doce	Linhares	BR	-19.4075	-40.0639	949.654	LINHARES	-19.4102	-40.0639	6.8093	0.566667	GLORICH	832.432	0.0713489
58	Tista River	Kaunia	BD	25.75	89.5	949.45	Tista at Kaunia	25.5942	89.5479	7.65	0.636396	GLORICH	265.338	0.0713336
59	Rufiji River	Pangani	TZ	-7.82	37.87	933.54	Ruvu River - At Rufiji Stiglers Gorge	-7.8	37.9275	7.46667	0.404145	GEMSTAT	340.473	0.0701382
60	Maenam Chao Phraya	Wat Phikun Ngam	TH	15.2714	100.271	932.56	Chao Phrya River - Phra Khanong	13.8667	100.477	7.42273	0.244816	GEMSTAT	361.439	0.0700646
61	Loire	Montjean	FR	47.38	-0.83	911.927	Loire À Montjean-Sur-Loire	47.3927	-0.86074	7.7721	0.464026	GEMSTAT	224.741	0.0685144
62	Alabama River	Claiborne, Ala.	US	31.5468	-87.5125	910.833	ALABAMA RIVER AT CLAIBORNE AL	31.5478	-87.5189	7.35315	0.329694	GLORICH	397.312	0.0684322
63	Skeena River	Usk	CA	54.6306	-128.432	909.859	Skeena River at Usk	54.6354	-128.411	7.65555	0.340307	GLORICH	263.343	0.0683591
64	Skeena River	Usk	CA	54.6306	-128.432	909.859	Skeena River at Usk	54.6354	-128.411	7.65555	0.340307	GLORICH	263.343	0.0683591
65	Pur	Samburg	RU	67	78.22	904.131	Pur	66.9695	78.244	6.98	NA	GLORICH	659.976	0.0679287
66	Tombigbee River	Coffeeville L+D Near Coffeeville, Al	US	31.7585	-88.1292	831.92	TOMBIGBEE R BL COFFEEVILLE L&D NEAR COFFEEVILLE	31.7563	-88.1271	7.3635	0.329046	GLORICH	391.759	0.0625034
67	Oyapok Fleuve	Maripa	GF	3.82	-51.88	831.4	Rio Oyapock at Saut Maripa	3.80229	-51.8816	6.31198	0.369942	GLORICH	1637.14	0.0624643
68	Rio Negro	Primera Angostura	AR	-40.43	-63.67	828.35	R铆o Negro, Argentina, at Panamericana	-40.0817	-64.4646	7.656	0.79516	GLORICH	263.181	0.0622352
69	Saint John River	Below Mactaquac	CA	45.9622	-66.8308	812.856	ST JOHN R. N SIDE LANDING OF FORMER MCKINLEY FERRY	45.961	-66.8297	7.00938	0.28889	GLORICH	634.129	0.0610711
70	Rio Paraiba Do Sul	Campos - Ponte Municipal	BR	-21.7533	-41.3003	807.382	CAMPOS - PONTE MUNICIPAL	-21.7533	-41.3003	6.90396	0.469077	GLORICH	731.885	0.0606598
71	Rio Cauca	La Pintada	CO	5.73	-75.6	790.178	NA	3.45608	-76.4684	7.05538	0.289017	GLORICH	595.666	0.0593672
72	Vistula	Tczew	PL	54.0872	18.8056	777.643	Vistula River - Kiezmark	54.2564	18.9464	8.0865	0.333535	GEMSTAT	146.549	0.0584255
73	Rio Parnaiba	Porto Formosa	BR	-3.47	-42.5	769.648	LUZIL脗NDIA	-3.45192	-42.3697	6.32234	0.821174	GLORICH	1614.24	0.0578248
74	Rio Santa Cruz	Charles Fuhr	AR	-50.27	-71.9	718.382	Rio S. CRUZ	-49.9979	-68.9223	6.368	0.432978	GLORICH	1517.05	0.0539731
75	Elbe River	Neu Darchau	DE	53.2323	10.8888	694.613	Elbe River - At Geesthacht	53.4333	10.3667	7.57682	0.172218	GEMSTAT	293.104	0.0521873
76	Rio Negro	Palmar	UY	-33.12	-57.18	693.872	EST脗NCIA DO ESPANTOSO	-31.5395	-54.2856	7.12625	0.455229	GLORICH	540.937	0.0521316
77	Senegal Fleuve	Dagana	SN	16.52	-15.5	693.097	NA	16.5189	-15.5193	7.62	0.255343	GLORICH	276.387	0.0520734
78	Glomma	Solbergfoss	NO	59.6373	11.1535	692.819	Glomma Ved Sarpsfoss	59.2779	11.1342	7.11795	0.15023	GEMSTAT	547.074	0.0520525
79	Riviere Saint-Maurice	Centrale De Grande-Mere	CA	46.6158	-72.6794	692.725	Saint-Maurice River, Water Intake At Trois-Rivières Water Treatment Plant (05010007)	46.382	-72.6105	7.30128	0.542961	GEMSTAT	426.349	0.0520455
80	Sacramento River	Sacramento, Ca	US	38.5866	-121.505	673.555	AMERICAN R A SACRAMENTO CA	38.5687	-121.423	7.41071	0.204286	GLORICH	367.393	0.0506052
81	Rio Garona	Mas-D'Agenais	FR	44.42	0.23	671.096	Garonne River - Couthures	44.5167	0.0666667	7.92712	0.359516	GEMSTAT	182.021	0.0504204
82	Nushagak River	Ekwok, Ak	US	59.3484	-157.475	665.512	NUSHAGAK R AT EKWOK AK	59.332	-157.46	7.09783	0.608638	GLORICH	562.257	0.0500009
83	Mezen'	Malonisogorskaya	RU	65	45.62	649.94	Mezen River	63.6306	49.4528	6.90601	0.46408	GEMSTAT	729.84	0.048831
84	Apalachicola River	Near Sumatra, Fla	US	29.9494	-85.0155	639.224	APALACHICOLA RIVER NR SUMATRA,FLA.	29.9481	-85.0146	7.42933	0.384913	GLORICH	358.207	0.0480258
85	Papaloapan	Papaloapan	MX	18.17	-96.08	638.519	Papaloapan Bridge	18.1674	-96.0976	7.77205	0.332282	GEMSTAT	224.756	0.0479729
86	Vuoksi	Tainionkoski	FI	61.2167	28.7833	601.378	Vuoksi River - At Mansikkakoski 2800	61.1972	28.7808	6.89091	0.135471	GEMSTAT	744.987	0.0451824
87	Rio Capim	Badajos	BR	-2.51278	-47.7681	601.212	BADAJ脫S	-2.50611	-47.7679	5.62815	0.71713	GLORICH	4149.39	0.0451699
88	Clutha River / Matau Branch	Balclutha	NZ	-46.2373	169.748	572.229	Clutha at Balclutha	-46.2352	169.748	7.80462	0.22567	GLORICH	215.019	0.0429924
89	Kemijoki	Isohaara	FI	65.7833	24.55	567.567	Kemijoki River - At Isohaara 14000	65.7925	24.5458	6.96667	0.307754	GEMSTAT	672.052	0.0426421
90	Rio Douro	Regua	PT	41.15	-7.68	542.042	Douro River - At Albufeira Do Crestuha	41.07	-8.43	7.36667	0.386711	GEMSTAT	390.074	0.0407244
91	Gota Alv	Vargoens Krv	SE	58.3551	12.3749	531.458	G枚ta 脛lv Varg枚n	58.3627	12.391	7.20574	0.152001	GLORICH	485.511	0.0399292
92	Samaria	Samaria	MX	17.9792	-93.275	526.389	Rio Samaria 1	17.9555	-93.3024	7.84951	0.315729	GEMSTAT	202.283	0.0395484
93	Shinano Gawa	Ojiya	JP	37.31	138.81	511.703	???, ??????????	37.3319	138.818	6.86364	0.162928	GLORICH	773.138	0.038445
94	Oder River	Gozdowice	PL	52.7642	14.3178	509.52	Oder River - At Hohenwutzen	52.8375	14.1244	8.05682	0.548585	GEMSTAT	152.586	0.038281
95	Lulealven	Bodens Krv (+ Vattenverk, Trangfors)	SE	65.8076	21.6705	507.149	Lule Alv River - At Lulea	65.6	22.01	6.86618	0.230231	GEMSTAT	770.472	0.0381029
96	Soul River	Indogyo	KR	37.52	126.97	505.981	NA	37.5315	127.265	7.63	0.571548	GLORICH	272.654	0.0380151
97	Little Mecatina River	En Amont De La Riviere Netagamiou	CA	50.8686	-59.5992	495.48	LITTLE MECATINA RIVER ABOVE LAC FOURMONT	52.2314	-61.3226	6.58292	0.361284	GLORICH	1132.56	0.0372261
98	Sungai Kelantan	Guillemard Bridge	MY	5.77	102.15	492.281	Kelantan River	5.7625	102.15	7.08636	0.38512	GEMSTAT	571.091	0.0369858
99	Connecticut River	Thompsonville, Ct	US	41.9873	-72.6054	490.091	CONNECTICUT RIVER AT THOMPSONVILLE, CT.	41.9896	-72.6063	7.20798	0.344316	GLORICH	484.031	0.0368213
100	Rudkhaneh-Ye Karun	Ahvaz	IR	31.3333	48.6833	489.707	Karun River In Ahwaz City	31.3167	48.6667	8.08261	0.188057	GEMSTAT	147.327	0.0367924
101	Angermanalven	Solleftea Krv	SE	63.1719	17.2655	486.506	Strinne氓n	63.1791	17.4166	7.02	NA	GLORICH	625.032	0.0365519
102	Klamath River	Near Klamath, Ca	US	41.5143	-124	480.66	KLAMATH R NR KLAMATH CA	41.5146	-124.002	7.97809	0.400032	GLORICH	169.83	0.0361127
103	Ishikari-Gawa	Ishikari-Ohashi	JP	43.1197	141.546	477.477	???, ?????12???????????	43.1141	141.561	6.68182	0.0873863	GLORICH	990.025	0.0358736
104	Rio Gurupi	Alto Bonito	BR	-1.8006	-46.3161	475.946	ALTO BONITO	-1.79949	-46.314	6.08171	0.394721	GLORICH	2239.22	0.0357585
105	Skagit River	Near Mount Vernon, Wa	US	48.4448	-122.335	470.894	SKAGIT RIVER NEAR MOUNT VERNON, WASH.	48.4438	-122.333	7.28219	0.450545	GLORICH	437.564	0.035379
106	Waiau River	Lake Manapouri Outlet	NZ	-45.57	167.58	467.724	Waiau River - At Tuatapere	-46.1303	167.686	7.79079	0.36316	GEMSTAT	219.1	0.0351408
107	Nadym	Nadym	RU	65.62	72.67	460.043	Nadym	65.5506	72.7118	5.79	NA	GLORICH	3329.59	0.0345637
108	Coatzacoalcos	Las Perlas	MX	17.4381	-94.8667	449.273	Coatzacoalcos River	18.1083	-94.4167	7.15829	0.70685	GEMSTAT	517.873	0.0337545
109	Indalsalven	Bergeforsens Krv	SE	62.5197	17.3874	445.584	Indalsalven River - At Bergeforsen	62.53	17.4	7.2325	0.133959	GEMSTAT	468.157	0.0334774
110	Nyong	Dehane	CM	3.57	10.12	442.593	Nyong at Olama	3.43535	11.2895	5.94547	0.360839	GLORICH	2695.01	0.0332527
111	Umealven	Stornorrfors Krv	SE	63.8535	20.0488	442.452	Ume Alv River - At Stornorrfors	63.85	20.0386	6.94437	0.147931	GEMSTAT	692.739	0.0332421
112	Limpopo River	Chokwe	MZ	-24.5	33	439.791	Limpopo River - At Hulukulu	-22.3333	31.1464	8.1675	0.330274	GEMSTAT	131.263	0.0330421
113	Rio Ebro	Tortosa	ES	40.8133	0.52066	431.42	EBRO EN TORTOSA	40.8149	0.51877	7.97472	0.236848	GLORICH	170.611	0.0324132
114	Buller River	Te Kuha	NZ	-41.8342	171.699	428.163	Buller at Te Kuha	-41.8311	171.697	7.6	0.159164	GLORICH	284.008	0.0321685
115	Kobuk River	Near Kiana, Alas.	US	66.973	-160.134	424.938	KOBUK R NR KIANA AK	66.9796	-160.143	7.09167	0.447133	GLORICH	566.987	0.0319262
116	Mogami Gawa	Sagoshi	JP	38.88	139.91	419.307	???, ???????????	38.8428	139.95	6.79167	0.162135	GLORICH	852.639	0.0315032
117	Trinity River	Liberty, Tx	US	30.0577	-94.8183	416.705	TRINITY RV AT ROMAYOR, TX	30.4271	-94.8479	7.74955	0.513946	GLORICH	231.74	0.0313077
118	Colorado River	Lees Ferry, Ariz.	US	36.8647	-111.588	413.705	COLORADO R AT LEES FERRY, AZ.	36.8646	-111.581	8.02321	0.222583	GLORICH	159.723	0.0310823
119	Rio Jequitinhonha	Itapebi	BR	-15.9483	-39.5236	412.442	ITAPEBI	-15.9483	-39.5236	7.15045	0.453069	GLORICH	523.42	0.0309874
120	Hudson River	Green Island, N.Y.	US	42.7523	-73.689	410.374	HUDSON RIVER AT GREEN ISLAND NY	42.7479	-73.6854	7.44085	0.448663	GLORICH	352.642	0.030832
121	Agano Gawa	Maoroshi	JP	37.7361	139.272	404.377	????, ?????????	37.8301	139.159	6.68182	0.0873863	GLORICH	990.025	0.0303814
122	Rio Panuco	Las Adjuntas	MX	21.9833	-98.5667	391.373	Rio Panuco Las Adjuntas	21.9599	-98.55	7.9525	0.39115	GEMSTAT	175.845	0.0294044
123	Tornealven	Karunki	FI	66.0307	24.0211	389.37	Torne Älv Mattila	65.8755	24.131	6.84233	0.296993	GEMSTAT	795.865	0.0292539
124	Penobscot River	Eddington, Me	US	44.8281	-68.6961	389.151	PENOBSCOT RIVER AT EDDINGTON, ME	44.8273	-68.6977	6.9046	0.278245	GLORICH	731.246	0.0292375
125	Altamaha River	Doctortown, Ga.	US	31.6547	-81.8279	372.856	ALTAMAHA RIVER AT DOCTORTOWN, GA.	31.6556	-81.8273	6.82973	0.734796	GLORICH	809.624	0.0280132
126	Riviere Richelieu	Rapides Fryers	CA	45.3983	-73.2589	360.607	Richelieu River, Water Intake Of Sorel'S Filtration Plant (03040009)	46.034	-73.1176	7.76512	0.40527	GEMSTAT	226.885	0.0270929
127	Rio Amapari	Sierra Do Navio	BR	0.90056	-52.01	359.372	SERRA DO NAVIO	0.900707	-52.0145	6.22689	0.575618	GLORICH	1838	0.0270002
128	Grey River / Mawheranui	Dobson	NZ	-42.453	171.299	358.575	Grey at Dobson	-42.4522	171.298	7.32583	0.326982	GLORICH	412.349	0.0269403
129	Dramselva	Mjondalen Bru	NO	59.7529	10.0073	356.051	Drammenselva Ved Mjøndalsbrua (Gml.)	59.7534	10.009	7.0048	0.147418	GEMSTAT	638.086	0.0267506
130	Dalalven	Aelvkarleby Krv	SE	60.5636	17.4419	353.026	Dalalven River	60.5833	17.45	6.88362	0.175919	GEMSTAT	752.412	0.0265234
131	Rio Mino	Salvatierra De Mino	ES	42.0787	-8.49782	344.587	Minho River - At Valenca	41.9	-8.8	6.91522	0.384689	GEMSTAT	720.761	0.0258893
132	Tagus River	Almourol	PT	39.47	-8.37	342.692	Tejo River - At Santarem	39.2264	-8.67611	7.41606	0.372636	GEMSTAT	364.732	0.025747
133	Delaware River	Trenton, N.J.	US	40.2217	-74.7781	340.044	DELAWARE RIVER AT TRENTON NJ	40.2229	-74.7813	7.85422	0.556318	GLORICH	200.992	0.025548
134	Kitakami Gawa	Oizumi	JP	38.76	141.27	339.746	??? , ???????????????100m	38.7592	141.275	6.90833	0.264432	GLORICH	727.54	0.0255256
135	Potomac River	Near Washington, D.C. (Adjusted)	US	38.9496	-77.1275	339.295	POTOMAC RIVER AT CHAIN BRIDGE, AT WASHINGTON, DC	38.9312	-77.1146	8.03415	0.412426	GLORICH	157.364	0.0254917
136	Waikato River	Ngaruawahia Cableway	NZ	-37.6527	175.146	335.78	Waikato River - At Mercer Bridge	-37.2833	175.05	7.41388	0.314174	GEMSTAT	365.815	0.0252276
137	Seine	Poses	FR	49.3	1.25	332.061	Ignon 脿 Lamargelle	47.5324	4.84749	7.825	0.170783	GLORICH	209.14	0.0249482
138	Weser	Intschede	DE	52.964	9.125	319.122	Intschede	52.9647	9.15266	7.70745	0.211875	GLORICH	245.397	0.0239761
139	Pascagoula River	Graham Ferry, Ms	US	30.6106	-88.6411	318.971	PASCAGOULA RIVER NR BENNDALE, MS	30.8772	-88.7729	6.65363	0.421242	GLORICH	1028.71	0.0239648
140	Savannah River	Near Clyo, Ga.	US	32.5282	-81.2687	317.585	SAVANNAH RIVER NEAR CLYO, GA	32.5271	-81.2646	6.94671	0.267832	GLORICH	690.54	0.0238606
141	Meuse	Lith	NL	51.82	5.45	317.311	Meuse River - At Kinrooi	51.1292	5.82388	7.95036	0.174165	GEMSTAT	176.358	0.02384
142	Subarnarekha River	Kokpara	IN	22.42	86.42	314.694	Subarnerekha River - At Jamshedpur	22.5711	86.4806	7.66339	0.400045	GEMSTAT	260.549	0.0236434
143	Kalixalven	Raektfors	SE	66.1697	22.812	292.154	K脛LV脜N	66.1381	22.7457	6.62	NA	GLORICH	1076.86	0.02195
144	Colville River	Umiat, Ak	US	69.36	-152.12	288.469	COLVILLE R NR NUIQSUT AK	70.1686	-150.929	7.70933	0.38526	GLORICH	244.768	0.0216731
145	Rio Daule	La Capilla	EC	-1.69583	-79.9956	286.667	Daule River	-1.71667	-79.9933	7.35346	0.550824	GEMSTAT	397.143	0.0215377
146	Pearl River	Near Bogalusa, La.	US	30.7932	-89.8209	285.825	PEARL RIVER NEAR BOGALUSA, LA	30.7938	-89.8188	6.53377	0.450014	GLORICH	1210.85	0.0214745
147	Kymijoki	Anjala	FI	60.6984	26.8175	282.55	Kymijoki Kokonkoski 014	60.5085	26.8784	7.0946	0.132833	GEMSTAT	564.731	0.0212284
148	Nakdonggang	Samnangjin	KR	35.4	128.85	282.486	Nakdong River - An Dong	36.5192	128.422	7.7125	0.323955	GEMSTAT	243.716	0.0212236
149	Kennebec River	North Sidney, Me	US	44.4726	-69.6853	277.57	KENNEBEC RIVER AT NORTH SIDNEY, MAINE	44.4727	-69.6814	7.08809	0.295472	GLORICH	569.751	0.0208542
150	Kiso-Gawa	Imawatari	JP	35.43	137.04	273.778	???, ????????????????	35.4425	137.074	6.67273	0.064667	GLORICH	1002.34	0.0205693
151	Snohomish River	Near Monroe, Wa	US	47.8309	-122.049	271.784	SNOHOMISH RIVER NEAR MONROE, WASH.	47.8316	-122.044	7.07209	0.442033	GLORICH	582.283	0.0204195
152	Pee Dee River	Peedee, S.C.	US	34.2043	-79.5484	270.226	PEE DEE RIVER AT PEEDEE, SC	34.2061	-79.5478	6.86911	0.395286	GLORICH	767.408	0.0203025
153	Oulujoki	Merikoski	FI	65.0226	25.4734	260.772	Oulujoki River - At Merikoski 13000	65.0236	25.4694	6.82353	0.357651	GEMSTAT	816.48	0.0195922
154	Bol'Shoy Anyuy	Konstantinovo	RU	68.15	161.167	259.777	MalyyAnyuy	68.3054	161.212	7.08	NA	GLORICH	576.055	0.0195174
155	Kyuomono Gawa	Tsubakigawa	JP	39.61	140.16	252.458	???, ??????????????????	39.649	140.129	6.65455	0.0934199	GLORICH	1027.44	0.0189675
156	Orange River	Vioolsdrif (27811003)	ZA	-28.7578	17.7214	243.994	D8H003Q01 at Vioolsdrift on Orange	-28.7606	17.7317	8.08858	0.447589	GLORICH	146.135	0.0183316
157	Grijalva	Reforma	MX	17.9583	-93.1833	239.191	Rio Grijalva 15	18.0421	-92.8056	7.5925	0.394986	GEMSTAT	286.92	0.0179708
158	Bhima River	Takali	IN	17.4	75.85	238.006	Bhima River - Near Takali	17.4108	75.8503	7.8795	0.519811	GEMSTAT	194.198	0.0178817
159	Tone-Gawa	Fukawa (Tone North Branch)	JP	35.85	140.14	236.946	???, ???????????????	35.8918	140.053	7.1	0.192725	GLORICH	560.597	0.0178021
160	Flint River	Bainbridge, Ga	US	30.9116	-84.5799	234.357	FLINT R @ 10-MI STILL LANDING NR CHATTAHOOCHEE, FL	30.7858	-84.7268	7.82	NA	GLORICH	210.567	0.0176076
161	Tokachi Gawa	Moiwa	JP	42.8	143.52	233.152	???, ??????????????????????	42.8038	143.514	6.66667	0.11547	GLORICH	1010.64	0.0175171
162	Yodo Gawa	Hirakata	JP	34.81	135.65	232.958	??(??), ?????????3????????????	34.8067	135.619	6.74167	0.124011	GLORICH	912.635	0.0175025
163	Roanoke River	Roanoke Rapids, N.C.	US	36.4605	-77.6345	230.88	ROANOKE RIVER AT ROANOKE RAPIDS, NC	36.4604	-77.6313	6.83897	0.513874	GLORICH	799.519	0.0173464
164	Tiber River	Roma	IT	41.9	12.4833	230.423	Tiber River - At Ponte Ripetta	41.9667	12.5	7.32632	0.249092	GEMSTAT	412.078	0.017312
165	Exploits River	Grand Falls	CA	48.9306	-55.6686	229.044	EXPLOITS RIVER AT GRAND FALLS	48.9303	-55.6688	6.59184	0.370858	GLORICH	1118.9	0.0172084
166	Suwannee River	Near Bell, Fla	US	29.7913	-82.9243	227.862	SUWANNEE RIVER NEAR ROCK BLUFF SPRING (47)	29.7938	-82.9224	7.82	NA	GLORICH	210.567	0.0171196
167	Ljusnan	Ljusne Stroemmar Krv	SE	61.2123	17.0804	227.16	Ljusne Strömmar	61.2127	17.0819	6.94517	0.0963954	GEMSTAT	691.988	0.0170669
168	Pampanga River	San Agustin	PH	15.17	120.78	225.861	Pampanga River	15.0142	120.777	7.87959	0.339718	GEMSTAT	194.175	0.0169693
169	Merrimack River	Below Concord River At Lowell, Ma	US	42.6459	-71.2984	225.453	MERRIMACK RIVER BL CONCORD RIVER AT LOWELL, MA	42.6479	-71.2979	7.01309	0.272056	GLORICH	630.933	0.0169386
170	Rio Grande De Santiago	El Capomal	MX	21.825	-105.115	220.308	Rio Grande De Santiago 30	21.8258	-105.071	7.83731	0.314036	GEMSTAT	205.667	0.0165521
171	Kokemaenjoki	Harjavalta	FI	61.3375	22.1142	218.681	Kokemaenjoki River - Kojo 35 Pori-Tre	61.4564	21.8717	6.97059	0.287654	GEMSTAT	668.478	0.0164298
172	Brazos River	Richmond, Tex.	US	29.5825	-95.7577	216.679	BRAZOS RIVER AT RICHMOND, TX	29.5813	-95.7563	7.89892	0.398365	GLORICH	189.137	0.0162794
173	Whanganui River	Paetawa	NZ	-39.776	175.145	214.151	Whanganui at Paetawa	-39.7896	175.144	7.67214	0.192601	GLORICH	257.466	0.0160895
174	Rakaia River	Fighting Hill	NZ	-43.506	171.636	211.422	Waimakariri at Gorge	-43.3607	172.051	7.84118	0.240829	GLORICH	204.589	0.0158844
175	Tenryu-Gawa	Kashima	JP	34.85	137.81	210.736	???, ??????????????1km	34.8534	137.81	7.30833	0.124011	GLORICH	422.28	0.0158329
176	Adige	Trento	IT	46.0667	11.1333	209.433	Adige River - At Badia Polesine	45.106	11.5	7.73448	0.202689	GEMSTAT	236.539	0.015735
177	Adige	Trento	IT	46.0667	11.1333	209.433	Adige River - At Badia Polesine	45.106	11.5	7.73448	0.202689	GEMSTAT	236.539	0.015735
178	Yoneshiro Gawa	Futatsui	JP	40.2	140.24	208.823	???, ?????????????????????	40.2217	140.249	6.74545	0.0934199	GLORICH	907.946	0.0156892
179	Cauvery River	Grand Anicut	IN	10.83	78.83	208.418	Cauvery River - At Thanjavur	10.94	79.1431	7.975	0.512458	GEMSTAT	170.546	0.0156588
180	Umpqua River	Near Elkton, Or	US	43.586	-123.555	206.919	UMPQUA RIVER NEAR ELKTON, OREG.	43.5896	-123.556	7.4124	0.434815	GLORICH	366.55	0.0155461
181	Rio Guadalquivir	Sevilla	ES	37.3507	-6.02206	206.492	Guadalquivir River - At Seville	37.37	-5.9925	7.56618	0.244101	GEMSTAT	297.378	0.015514
182	Teshio Gawa	Maruyama	JP	44.92	141.89	205.768	???, ??????????	44.9943	141.821	6.625	0.0753778	GLORICH	1069.56	0.0154597
183	Eel River	Scotia, Calif.	US	40.4915	-124.1	205.106	EEL R A SCOTIA CA	40.4939	-124.098	8.02958	0.314606	GLORICH	158.345	0.0154099
184	Rio Ribeira De Iguape	Iporanga (Pcd)	BR	-24.5858	-48.5917	205.012	IPORANGA	-24.5857	-48.5895	7.44286	0.80643	GLORICH	351.678	0.0154029
185	James River	Cartersville, Va	US	37.671	-78.0858	201.352	JAMES RIVER AT CARTERSVILLE, VA	37.6729	-78.0854	7.33347	0.557791	GLORICH	408.087	0.0151279
186	San Juan	San Juan Evangelista	MX	17.88	-95.13	200.021	The Ceibilla	18.2299	-95.4447	7.43659	0.314123	GEMSTAT	354.691	0.0150279
187	Choctawhatchee River	Near Bruce, Fla	US	30.451	-85.8983	196.298	CHOCTAWHATCHEE RIVER NR BRUCE, FLA.	30.4521	-85.8979	7.19308	0.471874	GLORICH	493.942	0.0147482
188	Murray River	Below Wakool Junction	AU	-34.8472	143.342	192.099	MURRAY RIVER @ BELOW WAKOOL JUNCTION	-34.8479	143.344	7.12258	0.333376	GLORICH	543.643	0.0144327
189	Riviere Saint-Francois	A La Centrale De Hemming Falls	CA	45.8617	-72.4531	191.789	Saint-François River At Pierreville (03020031)	46.0664	-72.8122	7.9565	0.277177	GEMSTAT	174.891	0.0144094
190	Haast River	Roaring Billy	NZ	-43.9425	169.297	190.831	Haast at Roaring Billy	-43.9437	169.302	7.68625	0.174923	GLORICH	252.574	0.0143374
191	Pra	Daboasi	GH	5.1667	-1.6333	190.359	Pra River - At Daboase	5.11	-1.61444	7.13191	0.270351	GEMSTAT	536.786	0.014302
192	Androscoggin River	Near Auburn, Me.	US	44.0723	-70.2081	179.923	ANDROSCOGGIN RIVER NEAR AUBURN, ME	44.0731	-70.2064	6.66765	0.10146	GLORICH	1009.29	0.0135179
193	Tungabhadra River	Bawapuram	IN	15.55	77.95	179.872	Tungabhadra River - At Ullanuru	15.2667	76.35	8.37289	0.410327	GEMSTAT	99.2727	0.013514
194	Neches River	Evadale, Tex.	US	30.3558	-94.0932	178.266	NECHES RIVER AT EVADALE, TEX.	30.3567	-94.0942	6.78216	0.375551	GLORICH	863.732	0.0133934
195	Sabine River	Near Ruliff, Tex.	US	30.3038	-93.7438	175.51	SABINE RIVER NR RULIFF, TX	30.3063	-93.74	6.71243	0.39595	GLORICH	949.655	0.0131863
196	Norrstrom	Oevre Stockholm	SE	59.3	18.07	173.383	Norrstrom River - At Stockholm	59.33	18.07	7.75472	0.287626	GEMSTAT	230.115	0.0130265
197	Kenai River	Soldotna, Ak	US	60.4769	-151.082	172.833	KENAI R AT SOLDOTNA AK	60.4865	-151.083	7.62564	0.246788	GLORICH	274.275	0.0129852
198	Iijoki	Raasakka (Merikoski)	FI	65.3349	25.4113	172.763	Iijoki River - At Raasakan	65.3347	25.4128	6.78519	0.383008	GEMSTAT	860.188	0.0129799
199	Escambia River	Near Century, Fla.	US	30.9652	-87.2341	171.909	ESCAMBIA RIVER NEAR CENTURY, FL	30.9646	-87.2354	7.03514	0.427636	GLORICH	612.298	0.0129158
200	Rio Verde	Paso De La Reyna	MX	16.275	-97.5917	167.237	Rio Verde 2 Charco Redondo	16.0394	-97.751	7.688	0.465761	GEMSTAT	251.973	0.0125648
201	Kelani Ganga	Hanwella	LK	6.92	80.08	163.824	Kelani River - At Hanwella	6.91	80.083	7.01553	0.358033	GEMSTAT	628.84	0.0123083
202	Periyar River	Planchode	IN	10.17	76.75	163.178	Periyar River - Near Alwaye	10.125	76.3333	6.41975	0.776507	GEMSTAT	1413.96	0.0122598
203	Rogue River	Near Agness, Oreg.	US	42.5804	-124.059	161.116	ROGUE RIVER NEAR AGNESS,OREG.	42.5813	-124.06	7.5053	0.361995	GLORICH	323.045	0.0121049
204	Uji Gawa	Yodo	JP	34.89	135.72	160.454	???, ????????????	34.8473	135.68	6.93333	0.206559	GLORICH	703.22	0.0120551
205	Skelleftealven	Kvistforsens Krv	SE	64.7445	20.8633	160.11	脛NGESB脛CKEN	64.6413	20.9432	6.38	NA	GLORICH	1492.49	0.0120293
206	Uono Gawa	Horinouchi	JP	37.24	138.933	156.794	???, ?????????????????120m????	37.2361	138.953	6.63636	0.269343	GLORICH	1053.16	0.0117802
207	Paatsjoki	Rayakoski Ges	RU	69.0167	29	156.634	Paatsjoki River - At Virtaniemi 14400	68.8997	28.4169	7.07812	0.106965	GEMSTAT	577.526	0.0117681
208	Tana	Garissa	KE	-0.45	39.7	155.755	Tana River - At Garsen	-2.26667	40.1167	7.53571	0.473298	GEMSTAT	309.956	0.0117021
209	Cape Fear River	Lock #1 Near Kelly, Nc	US	34.4043	-78.2936	152.936	CAPE FEAR R AT LOCK # 1 NR KELLY, NC	34.4063	-78.2938	6.48536	0.482549	GLORICH	1293.25	0.0114903
210	Abukuma Gawa	Iwanuma	JP	38.09	140.87	151.748	???, ?????????????????	38.2132	140.833	7.06667	0.150555	GLORICH	586.596	0.0114011
211	Gono Kawa	Kawahira	JP	34.9953	132.287	151.382	??, ?????????	34.9843	132.497	6.9875	0.112599	GLORICH	653.278	0.0113736
212	Kumano-Gawa	Oga	JP	33.75	135.94	151.131	???, ??????????	33.7236	135.97	7	0.0894427	GLORICH	642.266	0.0113547
213	Oyodo Gawa	Kashiwada	JP	31.95	131.4	151.03	???, ????????	31.9216	131.402	7.10909	0.18684	GLORICH	553.709	0.0113471
214	Jinzu Gawa	Jintsu-Ohashi	JP	36.6983	137.207	150.644	???, ?????????????????	36.5997	137.255	7.15	0.13784	GLORICH	523.744	0.0113181
215	Vefsna	Lakfors	NO	65.6215	13.2907	148.393	Vefsna (Vaapstenjeanoe)	65.7496	13.2375	7.41871	0.200013	GEMSTAT	363.418	0.011149
216	Otra	Heisel	NO	58.2476	7.95143	148.344	Otra Ved Skråstad	58.1867	7.95295	5.89089	0.376217	GEMSTAT	2902.69	0.0111453
217	Meuse	Chooz	BE	50.0921	4.80652	146.313	Meuse River - At Kinrooi	51.1292	5.82388	7.95036	0.174165	GEMSTAT	176.358	0.0109927
218	Rio Maicuru	Arapari	BR	-1.7789	-54.3972	143.046	ARAPARI	-1.77919	-54.4023	6.12475	0.67737	GLORICH	2111.89	0.0107473
219	Shimanto Gawa	Gudo	JP	32.98	132.93	135.03	????, ??????????????	32.9735	132.945	7.23889	0.171974	GLORICH	464.107	0.010145
220	Papagayo	La Parota	MX	16.9292	-99.6083	134.607	Rio Papagayo 12	16.71	-99.6051	7.65564	0.411645	GEMSTAT	263.31	0.0101132
221	Seta Gawa	Toriigawa	JP	34.97	135.91	134.255	???, ????????????	34.9349	136.033	6.88333	0.132916	GLORICH	752.702	0.0100868
222	Rio Colorado	Pichi Mahuida	AR	-38.83	-64.83	128.462	R铆o Colorado, near Panam茅ricana	-38.9773	-64.1017	8.1425	0.326433	GLORICH	135.803	0.00965154
223	Nagara-Gawa	Sunomata	JP	35.36	136.69	127.923	???, ????????????????	35.3145	136.629	7.2	0.0894427	GLORICH	489.313	0.00961104
224	Yoshino Gawa	Chuo-Bashi	JP	34.09	134.35	126.587	???, ?????????????????	34.0653	134.196	7.19375	0.106262	GLORICH	493.49	0.00951067
225	San Joaquin River	Near Vernalis, Ca	US	37.676	-121.266	125.488	SAN JOAQUIN R NR VERNALIS CA	37.6771	-121.265	7.8295	0.452889	GLORICH	207.865	0.0094281
226	Ljungan	Skallboele Krv	SE	62.3636	16.9619	125.342	Ljungan Skallb枚leforsen	62.3651	16.9643	7.38	0.113137	GLORICH	383.064	0.00941713
227	Ara Kawa	Tsuzurayama	JP	38.1319	139.464	125.059	??, ???????????	38.1331	139.462	6.59	0.152388	GLORICH	1121.7	0.00939587
228	Queets River	Near Clearwater, Wa	US	47.5379	-124.316	124.502	QUEETS RIVER NEAR CLEARWATER, WASH.	47.5393	-124.315	7.31628	0.341919	GLORICH	417.742	0.00935402
229	Sauk River	Near Sauk, Wa	US	48.4246	-121.569	123.979	NF STILLAGUAMISH R AB SQUIRRE CR NR DARRINGTON, WA	48.2853	-121.639	8	NA	GLORICH	164.845	0.00931473
230	Rio Mondego	Coimbra	PT	40.2	-8.43	123.963	Mondego River - Ponte Penacova	40.1483	-8.68	7.19093	0.586304	GEMSTAT	495.389	0.00931352
231	Rio Paraguacu	Pedra Do Cavalo	BR	-12.6	-38.9833	122.803	Pedra Do Cavalo - Paraguacu River	-12.5878	-39	7.12267	0.673348	GEMSTAT	543.58	0.00922637
232	Gander River	Big Chute	CA	49.0153	-54.8536	121.279	GANDER RIVER NEAR GLENWOOD	49.0153	-54.8531	6.4	NA	GLORICH	1452.44	0.00911187
233	Southwest Miramichi River	Blackville	CA	46.7358	-65.8256	120.259	SOUTHWEST MIRAMICHI RIVER AT BRIDGE, BLACKVILLE	46.7356	-65.8224	6.84991	0.408987	GLORICH	787.71	0.00903524
234	Chikugo Gawa	Senoshita	JP	33.3161	130.497	119.247	???, ????????????	33.3289	130.527	6.55833	0.365459	GLORICH	1171.07	0.0089592
235	Neuse River	Near Fort Barnwell, Nc	US	35.3127	-77.3052	118.825	NEUSE RIVER AT SR1470 NR FT BARNWELL, NC	35.3143	-77.3022	7.2	NA	GLORICH	489.313	0.0089275
236	Kuma Gawa	Yokoishi	JP	32.46	130.66	118.167	??, ?????????	32.5645	130.679	7.45	0.250555	GLORICH	348.279	0.00887806
237	Wairau River	Tuamarina	NZ	-41.4409	173.965	117.425	Wairau at Tuamarina	-41.4397	173.952	7.60308	0.373639	GLORICH	282.822	0.00882231
238	Futun Xi	Shao-Wu-Hsien	CN	27.3	117.5	116.138	Min Jiang River - Fuzhou	26.1333	119.267	7.10566	0.160849	GEMSTAT	556.298	0.00872562
239	Chehalis River	Porter, Wash.	US	46.9379	-123.314	114.42	CHEHALIS RIVER AT PORTER, WASH.	46.9398	-123.315	7.26954	0.366431	GLORICH	445.156	0.00859654
240	Matanuska River	Palmer, Ak	US	61.6086	-149.073	113.104	MOOSE C NR PALMER AK	61.6957	-149.02	7.653	0.267667	GLORICH	264.257	0.00849767
241	Nooksack River	Ferndale, Wa	US	48.8448	-122.589	110.274	NOOKSACK RIVER AT BRENNAN, WA	48.8199	-122.577	7.5561	0.171827	GLORICH	301.482	0.00828505
242	Acheloos Potamos	Ayios Nikolaos (Kremasta)	GR	38.8833	21.5667	109.023	Acheloos River - At Agrinion	38.62	21.38	7.93516	0.297913	GEMSTAT	180.042	0.00819106
243	Clarence River	Lilydale (Newbold Crossing)	AU	-29.51	152.68	106.17	CLARENCE @ LILYDALE	-29.5058	152.682	7.82	NA	GLORICH	210.567	0.00797671
244	Smith River	Near Crescent City, Ca	US	41.7915	-124.076	105.24	SMITH R NR CRESCENT CITY CA	41.7896	-124.077	7.88208	0.35878	GLORICH	193.52	0.00790684
245	Unuk River	Near Stewart	CA	56.3514	-130.692	104.691	Unuk River near US Border	56.3564	-130.694	7.83565	0.139572	GLORICH	206.132	0.00786559
246	American River	Fair Oaks, Ca	US	38.6355	-121.228	104.678	ARCADE C NR DEL PASO HEIGHTS CA	38.6438	-121.381	7.43292	0.311176	GLORICH	356.461	0.00786461
247	Murrumbidgee River	Gundagai	AU	-35.0751	148.107	102.284	M'BIDGEE @ GUNDAGAI	-35.0733	148.108	7.37133	0.377604	GLORICH	387.61	0.00768475
248	Rio Mearim	Bacabal	BR	-4.21944	-44.7653	101.265	BACABAL	-4.21944	-44.7653	6.85833	0.358297	GLORICH	778.734	0.00760819
249	Edo Gawa	Nagareyama	JP	35.8492	139.9	100.728	???, ??????????????????	35.7924	139.865	6.83333	0.196638	GLORICH	805.666	0.00756784
250	Niyodo-Gawa	Ino	JP	33.55	133.42	99.901	???, ??????????????????1km	33.5531	133.41	7.36111	0.188302	GLORICH	393.032	0.00750571
251	Kuzuryu Gawa	Nakatsuno	JP	36.1	136.21	95.946	????, ????????????	36.1005	136.33	7.24167	0.188092	GLORICH	462.357	0.00720856
252	Puyallup River	Puyallup, Wa	US	47.2084	-122.327	94.405	PUYALLUP RIVER AT PUYALLUP, WASH.	47.2146	-122.34	7.25588	0.341066	GLORICH	453.504	0.00709279
253	Fuji Kawa	Kitamatsuno	JP	35.1917	138.586	91.909	???, ????????????????	35.139	138.633	7.5	0.27303	GLORICH	325.383	0.00690526
254	Maputo	Madubula (58631006)	MZ	-26.79	32.44	91.63	W4H009Q01 Phongolo River at Ndume Game Reserve	-26.9062	32.3277	7.73019	0.522541	GLORICH	237.922	0.0068843
255	Motala Strom	Holmen	SE	58.5887	16.1697	90.246	Motalal Strom River - Norrkoping	58.59	16.12	7.49314	0.265361	GEMSTAT	328.432	0.00678032
256	Naskaupi River	Below Naskaupi Lake	CA	54.1317	-61.4292	90.205	NASKAUPI RIVER BELOW NASKAUPI LAKE	54.1317	-61.4292	7.04	0.208652	GLORICH	608.26	0.00677724
257	Santa Catarina	Las Juntas	MX	16.7042	-98.2667	89.912	Rio Santa Catarina 4	16.6784	-98.3331	7.48436	0.487544	GEMSTAT	332.379	0.00675522
258	Darling River	Bourke Town	AU	-30.0879	145.937	89.748	DARLING BOURKE TOWN	-30.0855	145.937	7.71249	0.603676	GLORICH	243.721	0.0067429
259	Motu River	Houpoto	NZ	-37.8637	177.632	89.035	Motu at Houpoto	-37.8561	177.603	7.77385	0.236803	GLORICH	224.208	0.00668933
260	Sendai Gawa	Onobuchi	JP	31.86	130.34	88.33	???, ????????????	31.8269	130.313	6.89091	0.242712	GLORICH	744.987	0.00663636
261	Uthukela	Mandini (27661102)	ZA	-29.1403	31.3925	87.213	V5H002Q01 at Mandini on Tugela River	-29.143	31.3939	7.72576	0.535424	GLORICH	239.361	0.00655244
262	Sungai Muda	Ladang Victoria	MY	5.52	100.57	86.195	Muda River	5.60972	100.626	6.98732	0.433992	GEMSTAT	653.435	0.00647596
263	River Trent	Colwick	GB	52.9534	-1.07846	85.769	Trent River - Nottingham	52.9386	-1.135	7.89107	0.259786	GEMSTAT	191.168	0.00644395
264	Huon River	Judbury	AU	-43.0002	146.928	85.103	HUON RIVER D/S JUDBURY RD BRIDGE - Station No. 635	-42.9981	146.928	6.97766	0.673575	GLORICH	662.083	0.00639391
265	Aka Gawa	Hamanaka	JP	38.84	139.82	84.466	???, ???????????	38.8428	139.95	6.79167	0.162135	GLORICH	852.639	0.00634606
266	Suchiate	Suchiate Ii	MX	14.6833	-92.1333	82.449	Rio Suchiate 1	14.699	-92.1477	7.29317	0.394243	GEMSTAT	431.079	0.00619452
267	Upper Humber River	Near Reidville	CA	49.2406	-57.3625	82.111	UPPER HUMBER RIVER NEAR REIDVILLE	49.2396	-57.3645	7.75	0.919239	GLORICH	231.598	0.00616912
268	River Tweed	Norham	GB	55.7227	-2.16337	81.787	Tweed River - Above Galafoot	55.6033	-2.77861	7.71482	0.510508	GEMSTAT	242.947	0.00614478
269	Schuylkill River	Philadelphia, Pa	US	39.9679	-75.1885	81.625	SCHUYLKILL RIVER AT PHILADELPHIA, PA	39.9688	-75.1854	7.57637	0.457713	GLORICH	293.284	0.00613261
270	Oi Gawa	Kanza	JP	34.88	138.12	81.362	???, ????????	34.8561	138.134	7.28333	0.174946	GLORICH	436.885	0.00611285
271	Quinault River	Quinault Lake, Wash.	US	47.4576	-123.889	81.127	NORTH FORK QUINAULT R NEAR AMANDA PARK, WASH.	47.5979	-123.623	7.28354	0.364073	GLORICH	436.764	0.00609519
272	Ibi-Gawa	Mangoku	JP	35.36	136.66	80.241	???, ????????????????	35.3145	136.629	7.2	0.0894427	GLORICH	489.313	0.00602863
273	Kyuota Gawa	Yaguchi-1	JP	34.46	132.5	79.967	???, ??????????????????	34.4873	132.506	6.83077	0.125064	GLORICH	808.481	0.00600804
274	Ems River	Versen Wehrdurchstich Gesamt	DE	52.74	7.24	79.583	Ems at Gandersum	53.324	7.31253	7.51081	0.202462	GLORICH	320.634	0.00597919
275	River Thames	Kingston (Naturalised Discharge)	GB	51.4154	-0.30771	78.909	Thames River	51.4289	-0.317222	8.00455	0.340146	GEMSTAT	163.827	0.00592855
276	Iwaki Gawa	Goshogawara	JP	40.8075	140.441	78.775	??? , ?????????????	40.8301	140.405	6.78333	0.14668	GLORICH	862.357	0.00591848
277	Tama Gawa	Nagano	JP	39.54	140.533	78.643	????, ?????????	39.5827	140.553	6.40909	0.0700649	GLORICH	1434.6	0.00590856
278	Alttaeatnu	Kista	NO	69.8263	23.5168	77.972	Altaelva	69.901	23.2843	7.40621	0.21083	GEMSTAT	369.649	0.00585815
279	Honnai Gawa	Hiroomote	JP	39.29	141.07	76.921	??? , ???????????????	39.286	141.131	6.83333	0.360135	GLORICH	805.666	0.00577919
280	Sungai Kinta	Weir G.Tanjung Tualang	MY	4.32	101.15	76.794	Kinta River	4.38528	101.2	7.11867	0.458571	GEMSTAT	546.539	0.00576965
281	Housatonic River	Stevenson, Conn.	US	41.384	-73.1676	76.701	HOUSATONIC R AT STEVENSON, CT	41.3854	-73.1685	7.65054	0.443244	GLORICH	265.144	0.00576266
282	Saint Croix River	Baring	CA	45.1367	-67.3181	75.739	ST. CROIX RIVER AT BARING RR BRIDGE, USA SIDE	45.1399	-67.3188	6.82258	0.260397	GLORICH	817.535	0.00569038
283	Toshibetsu Gawa	Toshibetsu	JP	42.93	143.45	75.158	???, ????????	42.9192	143.361	6.8	0.0894427	GLORICH	843.03	0.00564673
284	Rio Guadiana	Puente De Palmas	ES	38.88	-6.97	75.057	Guadiana River - At Point Palmas Ba01A	38.8825	-6.9775	7.65581	0.217455	GEMSTAT	263.248	0.00563914
285	Mzimvubu	Ntontela	ZA	-31.3955	29.2651	74.559	T7H001Q01 Mngazi River at Mgwenyana 22/NMGAZI	-31.5483	29.2397	7.96993	0.433148	GLORICH	171.726	0.00560173
286	River Wye	Redbrook	GB	51.7963	-2.68627	73.453	Wyre River - St. Michaels Weir	53.87	-2.8	7.56316	0.28771	GEMSTAT	298.601	0.00551863
287	Calcasieu River	Near Kinder, La	US	30.5026	-92.9154	71.389	CALCASIEU RIVER NEAR KINDER, LA	30.5024	-92.9146	6.39147	0.545419	GLORICH	1469.39	0.00536356
288	Struma River	Marino Pole	BG	41.4167	23.35	69.841	Stryhon River - At Serres	41.27	23.32	7.85944	0.345706	GEMSTAT	199.569	0.00524726
289	Edisto River	Near Givhans, Sc	US	33.0279	-80.3915	68.782	EDISTO RIVER NR GIVHANS, SC	33.0269	-80.394	6.51831	0.42797	GLORICH	1236.57	0.00516769
290	River Spey	Boat O Brig	GB	57.551	-3.14039	65.665	Spey River - Fochabers.	57.6	-3.11583	6.73279	0.637108	GEMSTAT	923.724	0.00493351
291	Mattagami River	Near Timmins	CA	48.4	-81.44	65.541	Mattagami River at Timmins waterworks plant, N Hwy 101	48.4692	-81.377	7.6	NA	GLORICH	284.008	0.00492419
292	Mataura River	Gore Highway Bridge	NZ	-46.1	168.949	64.421	Mataura at Seaward Down	-46.3893	168.798	7.54769	0.260709	GLORICH	304.948	0.00484005
293	Shiribetsu-Gawa	Nakoma	JP	42.81	140.46	64.323	???, ?????????????25m	42.8857	140.752	6.675	0.176455	GLORICH	999.248	0.00483268
294	Takahashi Gawa	Hiwa	JP	34.71	133.68	63.905	???, ??????????????	34.6436	133.728	7.21667	0.224958	GLORICH	478.347	0.00480128
295	Kinu Gawa	Mitsukaido	JP	36.02	139.99	63.561	???, ????????????????????	36.0458	140	6.98333	0.0983192	GLORICH	656.991	0.00477543
296	Koyoshi Gawa	Todoroki-Bashi	JP	39.37	140.07	63.516	???, ??????????????	39.285	140.114	6.61667	0.111464	GLORICH	1081.75	0.00477205
297	Rangitikei River	Mangaweka	NZ	-39.8108	175.808	62.831	Rangitikei at Mangaweka	-39.8105	175.804	8.05714	0.195465	GLORICH	152.519	0.00472059
298	Santee River	Pineville, S.C.	US	33.45	-80.15	62.632	SANTEE RIVER NR. PINEVILLE, SC	33.4561	-80.1564	7.03182	0.317761	GLORICH	615.066	0.00470563
299	Yoshii Gawa	Tsuse	JP	34.87	134.11	62.612	???, ??????????????	34.8038	134.141	6.92308	0.123517	GLORICH	713.098	0.00470413
300	Lagan	Aengabaecks Krv	SE	56.4943	13.5085	62.556	LILL脜N	56.5067	13.5654	6.355	0.13435	GLORICH	1544.11	0.00469992
301	Ogeechee River	Near Eden, Ga.	US	32.1916	-81.4159	62.014	OGEECHEE RIVER NEAR EDEN, GA.	32.1906	-81.4148	6.9392	0.56661	GLORICH	697.634	0.0046592
302	Rio Coreau	Granja	BR	-3.11667	-40.8333	61.949	GRANJA	-3.12083	-40.8189	6.86667	0.680759	GLORICH	769.958	0.00465432
303	Russian River	Near Guerneville, Ca	US	38.5085	-122.928	61.899	RUSSIAN R NR GUERNEVILLE CA	38.5059	-122.927	7.8193	0.405225	GLORICH	210.768	0.00465056
304	Naka Gawa	Furusho	JP	33.94	134.62	60.878	???, ???????????????????	33.9227	134.566	7.41176	0.121873	GLORICH	366.868	0.00457385
305	Satilla River	Atkinson, Ga.	US	31.2213	-81.8673	60.742	SATILLA RIVER AT ATKINSON, GA.	31.2215	-81.8732	5.56543	0.918701	GLORICH	4518.9	0.00456364
306	Rio Maracacume	Maracacume	BR	-2.0536	-45.9556	60.177	MARACACUME	-2.05361	-45.9556	6.56	NA	GLORICH	1168.41	0.00452119
307	Amite River	Near Denham Springs, La	US	30.4641	-90.9904	59.027	AMITE R AT 4H CAMP NR DENHAM SPRINGS	30.4396	-90.9813	6.50702	0.45714	GLORICH	1255.71	0.00443479
308	Rio Santa Lucia	Paso Pache	UY	-34.37	-56.25	58.745	NA	-34.5146	-56.4021	7.35714	0.310868	GLORICH	395.159	0.0044136
309	Emajogi	Tartu	EE	58.38	26.7261	58.128	Emajõgi: Rannu-Jõesuu	58.3849	26.1341	8.34444	0.285939	GEMSTAT	103.189	0.00436724
310	Rio Uruguay	Puente Viejo Ruta 12	AR	-25.87	-54.53	57.255	R铆o Urugua铆	-25.8733	-54.565	7.22667	0.41489	GLORICH	471.885	0.00430165
311	Motueka River	Woodstock	NZ	-41.2579	172.822	56.779	Motueka at Woodstock	-41.2514	172.823	7.91917	0.37684	GLORICH	184	0.00426589
312	Oued Sbou	Azib Soltane	MA	34.28	-5.43	56.658	Sebou River - Lala Aicha Dam Site	34.5031	-6.36361	8.07248	0.284723	GEMSTAT	149.37	0.0042568
313	La Antigua	Cardel	MX	19.3617	-96.36	56.453	Bridge La Antigua	19.3146	-96.3101	7.70925	0.317808	GEMSTAT	244.795	0.0042414
314	Seomjingang	Sing Jeun	KR	35.18	127.57	56.159	Seomjin River - Dang Bok	35.0206	127.117	7.44583	0.384242	GEMSTAT	350.258	0.00421931
315	Asahi Gawa	Makiyama	JP	34.7386	133.964	55.376	??, ???????	34.7167	133.968	7.05	0.083666	GLORICH	600.044	0.00416048
316	Manning River	Killawarra	AU	-31.92	152.31	55.373	MANNING @ KILLAWARRA	-31.9192	152.302	7.64275	0.479831	GLORICH	267.968	0.00416026
317	Rio Bobos	Martinez De La Torre	MX	20.0617	-97.0283	54.546	Rio Bobos (El Filo)	19.9277	-97.1641	7.98525	0.383185	GEMSTAT	168.185	0.00409812
318	Rio Baluarte	Baluarte Ii	MX	22.9833	-105.825	53.587	Rio Baluarte 4	23.0621	-105.843	8.17097	0.550063	GEMSTAT	130.645	0.00402607
319	Alexis River	Near Port Hope Simpson	CA	52.6492	-56.8714	52.944	ALEXIS RIVER APPROX. 48 KM FROM PORT HOPE SIMPSON	52.6489	-56.8714	6.31783	0.53307	GLORICH	1624.18	0.00397776
320	Hurunui River	Mandamus	NZ	-42.7904	172.542	52.596	Hurunui at Mandamus	-42.7897	172.541	7.87692	0.137682	GLORICH	194.881	0.00395162
321	Piaxla	Ixpalino	MX	23.9556	-106.571	52.46	Rio Piaxtla 1	23.7256	-106.788	8.21364	0.396452	GEMSTAT	123.28	0.0039414
322	Seki-Gawa	Takada	JP	37.12	138.27	52.32	???, ????????	36.8405	138.364	7.07273	0.155505	GLORICH	581.781	0.00393088
323	Yura-Gawa	Fukuchiyama	JP	35.3	135.13	51.885	???, ????????????	35.3098	135.234	6.825	0.0965307	GLORICH	814.849	0.0038982
324	San Lorenzo	Santa Cruz	MX	24.4847	-106.947	51.462	San Lorenzo River 4	24.2682	-107.401	7.96865	0.376063	GEMSTAT	172.025	0.00386642
325	Bjerkreimselva	Bjerkreim Bru	NO	58.58	6.08	51.348	Bjerkreimselva Ved Tengs	58.4797	5.99554	6.0157	0.467654	GEMSTAT	2449.52	0.00385785
326	Saru Gawa	Biratori	JP	42.58	142.15	51.23	??, ???????????????2.6km	42.5739	141.936	6.96667	0.150555	GLORICH	672.052	0.00384899
327	Pantepec	Alamo	MX	20.9317	-97.66	51.108	Lopez Portillo Bridge	20.9282	-97.6805	7.99421	0.476233	GEMSTAT	166.148	0.00383982
328	Mabechi-Gawa	Ken-Yoshi	JP	40.44	141.35	50.925	??? , ????????????	40.4632	141.379	7.01667	0.164225	GLORICH	627.872	0.00382607
329	Riviere Sainte-Anne	Chute-Panet-1	CA	46.8528	-71.8775	50.666	Jacques_Cartier	46.7618	-71.6975	4.63	NA	GLORICH	16126.2	0.00380661
330	Candelaria	Candelaria	MX	18.18	-91.07	50.563	Candelaria	18.2632	-91.3021	7.66658	0.347736	GEMSTAT	259.422	0.00379887
331	Rio Piria	Sete Ilhas	BR	-1.8581	-46.7089	50.043	SETE ILHAS	-1.85578	-46.7066	6.69	NA	GLORICH	979.07	0.0037598
332	Aliakmonas Potamos	Ilarion	GR	40.08	21.8	49.993	Aliakmon River - At Kazani	40.02	21.78	8.08545	0.328522	GEMSTAT	146.758	0.00375605
333	Rio Chubut	Los Altares	AR	-43.85	-68.5	49.097	R铆o Chubut, near Panam茅rica	-43.2816	-65.2452	7.62	0.698964	GLORICH	276.387	0.00368873
334	Takatsu Gawa	Takatsuno	JP	34.67	131.83	49.046	???, ?????????	34.6369	131.795	7.05	0.206706	GLORICH	600.044	0.0036849
335	Kino Kawa	Funato	JP	34.25	135.31	48.883	???, ??????????????????200m	34.249	135.328	7.1	0.126491	GLORICH	560.597	0.00367265
336	Coahuayana	Callejones	MX	18.8	-103.608	48.455	Rio Coahuayana 1	18.6945	-103.738	7.926	0.36198	GEMSTAT	182.298	0.0036405
337	Rappahannock River	Near Fredericksburg, Va	US	38.3085	-77.5292	48.343	RAPPAHANNOCK RIVER NEAR FREDERICKSBURG, VA	38.3229	-77.5188	7.09163	0.426445	GLORICH	567.019	0.00363208
338	River Dee	Park	GB	57.0754	-2.33583	47.346	Dee River	53.1339	-2.87139	7.50133	0.326818	GEMSTAT	324.793	0.00355718
339	Brown River	Outlet Of Brown Lake	CA	65.93	-91.06	47.054	Brown River At Brown Lake	65.9356	-91.0666	6.60633	0.533954	GEMSTAT	1097.06	0.00353524
340	Kizu Gawa	Yawata	JP	34.88	135.71	46.877	???, ????????????	34.8473	135.68	6.93333	0.206559	GLORICH	703.22	0.00352194
341	Hime-Kawa	Yamamoto	JP	36.98	137.87	46.807	??, ?????????	37.0122	137.861	7.4	0.106904	GLORICH	372.785	0.00351668
342	Rio Ameca	Las Gaviotas Ii	MX	20.9083	-105.108	46.613	Mouth Of The Ameca River To Playa Nuevo Vallarta	20.6775	-105.285	7.86605	0.302276	GEMSTAT	197.783	0.0035021
343	Cazones	Poza Rica	MX	20.5467	-97.4583	45.733	Cazones Bridge	20.5435	-97.4752	7.949	0.614875	GEMSTAT	176.684	0.00343599
344	Sipocot River	Sabang	PH	13.81	122.99	45.502	Sipocot River	13.7603	122.973	7.48	NA	GLORICH	334.355	0.00341863
345	Miya-Kawa	Iwade	JP	34.46	136.66	45.433	???, ????????	34.5265	136.574	7.18333	0.116905	GLORICH	500.531	0.00341345
346	River Tyne	Bywell	GB	54.9499	-1.9413	45.3	Tyne River - Wylam Bridge	54.9753	-1.81583	7.67714	0.396788	GEMSTAT	255.721	0.00340346
347	Lam Dom Noi	Sae Falls	TH	15.183	105.366	44.597	Lam Dom Noi River - Lam Dom Noi Dam Site	15.2028	105.432	7.15352	0.322672	GEMSTAT	521.24	0.00335064
348	Macleay River	Turners Flat	AU	-30.0076	152.712	44.555	MACLEAY R AT TURNERS	-31.0065	152.71	7.67571	0.721661	GLORICH	256.219	0.00334748
349	Davey River	Hrs D/S Crossing Rv	AU	-43.1412	145.95	44.54	DAVEY RIVER B/L CROSSING RIVER - Station No. 473	-43.1396	145.952	5.74	1.12136	GLORICH	3563.87	0.00334636
350	Nestos Potamos	Temenos	GR	41.2833	24.4667	44.371	Nestos River - At Drama	41.25	24.53	7.62557	0.311622	GEMSTAT	274.3	0.00333366
351	Kiiminginjoki	Haukipudas	FI	65.1934	25.4069	44.313	Kiiminkij 13010 4-Tien S	65.1797	25.3565	6.5686	0.345937	GEMSTAT	1154.84	0.0033293
352	Byskealven	Byske	SE	64.9556	21.1848	43.57	Byskeb盲cken	64.9552	21.2092	6.52	NA	GLORICH	1233.74	0.00327348
353	Kuparuk River	Near Deadhorse, Ak	US	70.2814	-148.963	43.111	KUPARUK R NR DEADHORSE AK	70.2777	-148.963	7.28462	0.468366	GLORICH	436.124	0.00323899
354	Tukituki River	Red Bridge	NZ	-39.7154	176.927	43.102	Tukituki at Red Br.	-39.7183	176.927	8.61273	0.487013	GLORICH	71.6429	0.00323832
355	Var	Mescla	FR	43.75	6.9	42.987	Loup 脿 Gr茅oli猫res	43.7855	6.87277	8.26667	0.251661	GLORICH	114.702	0.00322968
356	Elwha River	Mcdonald Bridge Near Port Angeles, Wa	US	48.0548	-123.583	42.758	ELWHA RIVER AT MCDONALD BR NR PRT ANGELES, WASH.	48.0563	-123.585	7.45625	0.389451	GLORICH	345.331	0.00321247
357	Aude	Carcassonne (Pont Neuf)	FR	43.2133	2.36013	42.551	Fresquel 脿 Villemoustaussou, Aval Pont Rouge D 49	43.2394	2.3639	7.905	0.207344	GLORICH	187.58	0.00319692
358	Acaponeta	Acaponeta	MX	22.4833	-105.325	42.448	Acaponeta Ii	22.4418	-105.381	7.93685	0.561201	GEMSTAT	179.628	0.00318918
359	Snowy River	Jarrahmond	AU	-37.6611	148.361	42.405	SNOWY RIVER @ JARRAHMOND	-37.6603	148.36	7.32869	0.489054	GLORICH	410.753	0.00318595
360	Rio Fuerte Nuevo	San Miguel Zapotitlan	MX	25.9542	-109.046	41.967	Rio Fuerte 2	25.9568	-108.94	7.67925	0.214863	GEMSTAT	254.99	0.00315304
361	Liao He	Chiling	CN	42.2	123.5	41.907	Liao He River - Liaozhong	41.3333	122.633	7.75243	0.344948	GEMSTAT	230.835	0.00314853
362	Rio Humaya	Palos Blancos	MX	24.925	-107.382	41.903	Humaya River	24.9398	-107.355	8.01325	0.302938	GEMSTAT	161.901	0.00314823
363	Kako Gawa	Kunikane	JP	34.7972	134.918	41.664	???, ???????????????????????	34.7738	134.83	6.93529	0.157881	GLORICH	701.347	0.00313028
364	Hii Kawa	Otsu	JP	35.3656	132.786	41.584	???, ????????	35.3538	132.789	7.05	0.350325	GLORICH	600.044	0.00312427
365	Upsalquitch River	Upsalquitch	CA	47.8322	-66.8869	41.542	UPSALQUITCH RIVER AT R.R. BRIDGE (WSC GAUGE)	47.8354	-66.8895	7.94574	0.418183	GLORICH	177.468	0.00312111
366	Ngaruroro River	Chesterhope Br	NZ	-39.5964	176.872	41.347	Ngaruroro at Chesterhope	-39.598	176.861	7.98091	0.253513	GLORICH	169.181	0.00310646
367	Rane Alv	Niemisel	SE	66.0206	21.97	41.205	Rane Alv River	66.0022	22	6.71833	0.174092	GEMSTAT	942.061	0.00309579
368	Simojoki	Simo	FI	65.6654	25.0894	40.696	Simojoki As 13500	65.6618	25.0755	6.67413	0.391652	GEMSTAT	1000.43	0.00305755
369	Mu Kawa	Mukawa	JP	42.57	141.94	40.63	??, ???????????????2.6km	42.5739	141.936	6.96667	0.150555	GLORICH	672.052	0.00305259
370	Bay Du Nord River	Big Falls	CA	47.7467	-55.4417	39.97	BAY DU NORD RIVER, DOWNSTREAM OF WSC GAUGE STATION	47.7458	-55.4397	6.15806	0.196597	GLORICH	2018.37	0.00300301
371	Bree	Oude Pont (27694301)	ZA	-34.0703	20.39	39.789	H7H006Q01 at Swellendam on Bree River	-34.0686	20.406	7.16912	0.732369	GLORICH	510.297	0.00298941
372	Lepsamanjoki	Lankela	FI	64.768	24.875	39.666	Siikajoki 8-Tien S 11600	64.7177	24.9601	6.36842	0.299098	GEMSTAT	1516.18	0.00298017
373	Guadalupe River	Victoria, Tx	US	28.793	-97.013	39.608	GUADALUPE RIVER AT VICTORIA, TX	28.7939	-97.0148	7.93721	0.262042	GLORICH	179.54	0.00297581
374	Zayandeh Rud	Pol-E-Kaleh	IR	32.3833	51.2333	38.586	Zayandeh River In Isfanhan	32.6436	51.6603	7.9	0.181723	GEMSTAT	188.859	0.00289902
375	Nottoway River	Near Sebrell, Va	US	36.7704	-77.1661	38.069	NOTTOWAY RIVER NEAR SEBRELL, VA	36.7688	-77.1646	6.70737	0.367951	GLORICH	956.214	0.00286018
376	Katsura Gawa	Noso	JP	34.9	135.72	37.986	???, ????????????	34.8473	135.68	6.93333	0.206559	GLORICH	703.22	0.00285394
377	Kuji-Gawa	Sakaki-Bashi	JP	36.49	140.57	37.644	??? , ??????????????60m	36.5437	140.429	6.98333	0.0983192	GLORICH	656.991	0.00282825
378	Kano Gawa	Tokura	JP	35.09	138.9	37.104	???, ????????????	35.035	138.939	6.74167	0.231432	GLORICH	912.635	0.00278768
379	Kikuchi Gawa	Tamana	JP	32.94	130.59	37.023	???, ??????????????????	32.9261	130.564	7.15	0.124316	GLORICH	523.744	0.00278159
380	River Lune	Caton	GB	54.0816	-2.72089	36.984	Lune River - Denny Bridge	54.03	-2.8	7.959	0.503943	GEMSTAT	174.297	0.00277866
381	Maruyama-Gawa	Fuichiba	JP	35.48	134.8	36.779	???, ???????????????H.W.	35.4821	134.789	6.95833	0.0514929	GLORICH	679.712	0.00276326
382	Opper Schelde	Bossuit	BE	50.7412	3.39198	36.426	Scheldt River - Zandvliet	51.3483	4.2525	7.82709	0.142977	GEMSTAT	208.547	0.00273674
383	Firth River	Near The Mouth	CA	69.3136	-139.567	36.381	Firth River Near The Mouth	69.3264	-139.567	8.14	0.380293	GEMSTAT	136.265	0.00273336
384	River Boyne	Slane Castle	IE	53.7072	-6.56242	36.124	Boyne River - At Slane Bridge	53.7	-6.53333	8.1051	0.201731	GEMSTAT	142.888	0.00271405
385	Helge A	Torsebro Krv (Powerstation)	SE	56.103	14.1294	36.034	OLINGE脜N	56.223	14.0726	6.875	0.0636396	GLORICH	761.281	0.00270729
386	Appomattox River	Matoaca, Va	US	37.2252	-77.4753	35.885	APPOMATTOX RIVER AT MATOACA, VA	37.2266	-77.4754	7.09273	0.40048	GLORICH	566.166	0.00269609
387	Viskan	Asbro 3	SE	57.2397	12.3088	35.703	Viskan 脜sbro	57.2521	12.3318	7.11778	0.182468	GLORICH	547.206	0.00268242
388	Watarase-Gawa	Fujioka	JP	36.25	139.66	35.533	???, ?????????????????	36.1968	139.538	6.85	0.224465	GLORICH	787.61	0.00266965
389	Hiji-Kawa	Ozu	JP	33.5	132.55	35.44	??, ?????????	33.5032	132.553	7.16429	0.249762	GLORICH	513.667	0.00266266
390	Naruse Gawa	Noda-Bashi	JP	38.52	141.06	35.244	???, ??????????????30m	38.5383	140.93	6.9	0.0894427	GLORICH	735.833	0.00264793
391	La Have River	West Northfield	CA	44.4467	-64.5917	34.987	LAHAVE RIVER @ WEST NORTHFIELD BRIDGE (WSC GAUGE)	44.4481	-64.5933	5.84162	0.356386	GLORICH	3103.84	0.00262863
392	River Blackwater	Killavullen	IE	52.1492	-8.51539	34.534	Blackwater River - At Killavullen	52.1489	-8.51667	7.83407	0.368848	GEMSTAT	206.577	0.00259459
393	River Ribble	Samlesbury	GB	53.7684	-2.62468	34.471	Ribble River - Samlesbury	53.77	-2.62361	8.00824	0.418795	GEMSTAT	163.009	0.00258986
394	Karvianjoki	Karvianjoki (Etelaj+Pohjajoki+Lankoski)	FI	61.6734	21.7427	34.415	Eteläjoki Tie 272 Mts	61.6465	21.69	6.84833	0.267754	GEMSTAT	789.397	0.00258565
395	Orb	Beziers-Tabarka	FR	43.4	3.2	34.035	Orb 脿 Lignan sur Orb, Lieu dit Tabarka. Aval pont*	43.3688	3.17275	8.06786	0.172768	GLORICH	150.313	0.0025571
396	Omoi-Gawa	Otome	JP	36.26	139.75	33.631	??, ?????????	36.3249	139.798	7.0375	0.130247	GLORICH	610.332	0.00252675
397	Riacho Salado	El Arenal	AR	-26.22	-63.75	33.172	Río Salado	-31.6532	-60.7519	7.48	0.393954	GLORICH	334.355	0.00249226
398	Yellow River	Milligan, Fla.	US	30.753	-86.6291	32.631	YELLOW RIVER AT MILLIGAN, FLA.	30.7521	-86.6271	6.91295	0.484407	GLORICH	722.987	0.00245162
399	Rio Tehuantepec	Las Cuevas Ii	MX	16.425	-95.3292	32.466	Rio Tehuantepec 2	16.4178	-95.328	8.12136	0.594309	GEMSTAT	139.763	0.00243922
400	Hino Gawa	Kuzumo	JP	35.4278	133.367	32.437	???, ???????????????	35.4196	133.366	6.96667	0.149747	GLORICH	672.052	0.00243704
401	Lapuanjoki	Keppo	FI	63.3615	22.6985	32.41	Lapuanjoki 9900	63.5252	22.5282	6.04615	0.549692	GEMSTAT	2350.15	0.00243501
402	Sho Gawa	Daimon	JP	36.73	137.05	31.739	???, ?????????????????????300m	36.5976	137.141	7.28333	0.132916	GLORICH	436.885	0.0023846
403	Pyhajoki	Tolpankoski	FI	64.3612	24.3995	31.432	Pyhäjoki Hourunk 11400	64.4619	24.2666	6.65671	0.321345	GEMSTAT	1024.41	0.00236153
404	Waipaoa River	Kanakanaia Cableway	NZ	-38.4616	177.876	31.431	Waipoa at Kanakanaia	-38.4681	177.882	8.21286	0.0625643	GLORICH	123.411	0.00236146
405	Oued Oum Er Rbi'	Dechra El Oued	MA	32.68	-5.9	31.224	Oum-Er-Rbia River - At Sidi Daoui	32.9361	-8.0625	8.29766	0.196845	GEMSTAT	109.968	0.00234591
406	Rio Mundau	Fazenda Boa Fortuna	BR	-9.4672	-35.8597	30.691	FAZENDA BOA FORTUNA	-9.46892	-35.8602	6.30707	0.716781	GLORICH	1648.12	0.00230586
407	Rio De Contas	Jequie	BR	-13.8667	-40.0833	30.418	JEQUI脡	-13.8642	-40.0808	7.46569	1.03157	GLORICH	340.925	0.00228535
408	Tarawera River	Awakaponga	NZ	-37.9405	176.767	30.004	Tarawera at Awakaponga	-37.9399	176.765	7.2125	0.054293	GLORICH	481.065	0.00225424
409	Umkhomazi	Delos Estate (27662506)	ZA	-30.1689	30.6969	29.951	U1H006Q01 Shozi (delos Estate) on Mkomazi	-30.1683	30.6978	7.40254	0.69576	GLORICH	371.499	0.00225026
410	Peace River	Arcadia, Fla.	US	27.2223	-81.8759	29.887	PEACE RIVER AT ARCADIA, FLA.	27.2188	-81.8813	7.26991	0.617815	GLORICH	444.931	0.00224545
411	Rio Do Carmo	Acaiaca - Jusante	BR	-20.3614	-43.1394	29.222	ACAIACA - JUSANTE	-20.3614	-43.1394	7.19049	0.496392	GLORICH	495.684	0.00219549
412	Eman	Emsfors Bruk	SE	57.1431	16.4513	29.17	Em氓n Emsfors	57.1439	16.4561	7.06583	0.14878	GLORICH	587.261	0.00219159
413	Hunter River	Belmore Bridge (Maitland)	AU	-32.73	151.55	29.001	HUNTER R @ MAITLAND	-32.7273	151.556	8.27567	0.166209	GLORICH	113.306	0.00217889
414	Karasu Gawa	Iwahana	JP	36.29	139.08	28.581	??, ????????????????????	36.2909	139.071	7.21667	0.299444	GLORICH	478.347	0.00214733
415	Yubetsu Gawa	Kaisei	JP	44.1	143.55	28.465	???, ???????????100m	44.0528	143.517	6.71667	0.0983192	GLORICH	944.198	0.00213862
416	Rio Paraiba	Ponte Da Batalha	BR	-7.13	-35.0475	28.46	PONTE DA BATALHA	-7.13	-35.0475	7.16273	1.09915	GLORICH	514.756	0.00213824
417	Onga Gawa	Hinode-Bashi	JP	33.75	130.73	27.845	???, ?????????	33.7402	130.728	6.95833	0.162135	GLORICH	679.712	0.00209204
418	Saco River	Near Conway, N.H.	US	43.9909	-71.0909	27.64	SACO RIVER AT CORNISH, ME	43.8061	-70.7814	6.56871	0.233471	GLORICH	1154.65	0.00207663
419	Morrumsan	Morrum	SE	56.1939	14.7486	27.172	M枚rrums氓n M枚rrum	56.19	14.7525	7.04455	0.170315	GLORICH	604.512	0.00204147
420	Shiroishi Gawa	Funaoka-Ohashi	JP	38.06	140.77	27.09	???, ???????????????1.2km	38.0392	140.714	6.95	0.151658	GLORICH	687.46	0.00203531
421	Rio Curu	Santo Luiz Do Curu	BR	-3.68	-39.25	26.816	S脙O LU脥S DO CURU	-3.67402	-39.2442	7.515	0.58701	GLORICH	318.812	0.00201473
422	River Derwent	Camerton	GB	54.6604	-3.49437	26.654	Derwent River - Derwenthaugh	54.97	-1.65	7.57761	0.469629	GEMSTAT	292.789	0.00200255
423	Mitchell River	Glenaladale	AU	-37.7636	147.375	26.5	MITCHELL RIVER @ GLENALADALE	-37.7646	147.373	7.21875	0.407142	GLORICH	476.994	0.00199098
424	Withlacoochee River	Near Holder, Fla.	US	28.9889	-82.3495	26.49	WITHLACOOCHEE RIVER NR HOLDER, FLA.	28.9896	-82.3492	7.51556	0.326187	GLORICH	318.572	0.00199023
425	Rio Pojuca	Tiririca	BR	-12.5119	-38.0667	26.394	TIRIRICA	-12.5119	-38.0689	7.31515	1.02601	GLORICH	418.383	0.00198302
426	Ibo Gawa	Kamigawara	JP	34.8011	134.563	25.88	???, ??????????????????	34.8081	134.563	6.76667	0.11547	GLORICH	882.127	0.0019444
427	Abe Kawa	Tegoshi	JP	34.96	138.37	25.7	???, ????????(??????)??????????	35.038	138.371	7.68333	0.2329	GLORICH	253.578	0.00193088
428	Rio Itapicuru	Usina Altamira	BR	-11.7347	-37.8033	25.629	USINA ALTAMIRA	-11.7314	-37.8035	7.55933	0.782546	GLORICH	300.158	0.00192554
429	Yamato Gawa	Kashiwara	JP	34.58	135.62	25.334	???, ?????????2????????????	34.5732	135.629	6.95	0.162369	GLORICH	687.46	0.00190338
430	Lachlan River	Forbes (Cottons Weir)	AU	-33.4108	147.991	25.303	LACHLAN FORBES CTTNS	-33.4016	147.99	7.55486	0.35809	GLORICH	301.989	0.00190105
431	Pipers Hole River	Mothers Brook	CA	47.9469	-54.2856	25.255	PIPERS HOLE RIVER AT MOTHERS BROOK	47.9269	-54.2733	6.33778	0.326154	GLORICH	1580.69	0.00189745
432	Vasterdalalven	Ersbo	SE	61.3076	13.011	25.244	Östvallen	61.0962	13.3217	6.905	0.00707107	GLORICH	730.846	0.00189662
433	Kurobe Gawa	Unazuki	JP	36.81	137.59	25.161	???, ??????????????????	36.852	137.56	7.18333	0.12673	GLORICH	500.531	0.00189038
434	Torrent River	Bristol'S Pool	CA	50.6075	-57.1511	24.863	TORRENT RIVER AT BRISTOL'S POOL POINT	50.6063	-57.1518	7.02293	0.341784	GLORICH	622.544	0.00186799
435	South Esk River	Hrs Above Macquarie River	AU	-41.5983	147.203	23.818	SOUTH ESK ABOVE MACQUARIE RIVER - Station No. 181	-41.5978	147.202	7.02394	0.422537	GLORICH	621.689	0.00178948
436	Rio Cachoeira	Contorno Da Br-101	BR	-14.815	-39.2961	23.503	CONTORNO DA BR-101	-14.8146	-39.2938	7.73645	1.16638	GLORICH	235.905	0.00176582
437	Maloma River	San Felipe	PH	15.13	120.06	23.454	Maloma River	15.1107	120.064	8.1	0.0424264	GLORICH	143.883	0.00176213
438	Gudena	Ulstrup Bro	DK	56.3936	9.7941	22.573	Gudena River - Tvilum Bro	56.25	9.66861	7.8698	0.383974	GEMSTAT	196.778	0.00169594
439	Rio Paz	La Hacahdura	SV	13.85	-90.08	22.385	Paz River - Jobo Station	14.0167	-89.9072	8.21889	0.330559	GEMSTAT	122.402	0.00168182
440	Contentnea Creek	Hookerton, Nc	US	35.4291	-77.5827	22.344	CONTENTNEA CREEK AT HOOKERTON, NC	35.4271	-77.5813	6.50828	0.44223	GLORICH	1253.56	0.00167874
441	Te Awa Kairangi / Hutt River	Birchville	NZ	-41.1008	175.091	22.05	Hutt at Kaitoke	-41.0522	175.193	7.53714	0.153845	GLORICH	309.355	0.00165665
442	Rio Capibaribe	Sao Lourenco Da Mata	BR	-8.01667	-35.05	21.909	S脙O LOUREN脟O DA MATA II	-7.99861	-35.0392	7.2	0.454019	GLORICH	489.313	0.00164606
443	Nykopingsan	Langhalsen	SE	58.82	16.93	21.82	Nyköpingsån Spånga	58.8306	16.9205	7.38186	0.166552	GEMSTAT	382.094	0.00163937
444	Osterdalalven	Siljan	SE	60.6	15.01	21.82	Dalälven	60.6056	15.0345	7.01604	0.0720443	GEMSTAT	628.406	0.00163937
445	Rangitaiki River	Murupara	NZ	-38.4601	176.7	21.017	Rangitaiki at Murapara	-38.4569	176.698	7.75083	0.237351	GLORICH	231.336	0.00157904
446	Ci Manuk	Leuwidaun	ID	-7.21	107.898	20.815	Cimanuk River	-6.76194	108.133	8	0.353246	GEMSTAT	164.845	0.00156386
447	Hastings River	Ellenborough (Kindee Bridge)	AU	-31.4241	152.47	20.388	HASTING ELLENBOROUGH	-31.4271	152.469	7.39667	0.452806	GLORICH	374.479	0.00153178
448	Oued Moulouya	Dar El Caid	MA	34.24	-3.32	20.19	NA	35.1232	-2.34319	7.75	0.238048	GLORICH	231.598	0.0015169
449	Abashiri Gawa	Hongo	JP	43.895	144.137	20.168	???, ??????30?????	43.8317	144.094	6.84	0.181659	GLORICH	798.395	0.00151525
450	River Slaney	Scarrawalsh	IE	52.5485	-6.55022	19.993	Slaney Br Bunclody	52.6561	-6.6494	7.96071	0.275006	GEMSTAT	173.892	0.0015021
451	Indian Brook	Indian Falls	CA	49.5119	-56.1125	19.356	INDIAN BROOK NEAR SPRINGDALE	49.4977	-56.0896	6.81449	0.438856	GLORICH	826.584	0.00145424
452	Great Kei	Area 8 Springs B	ZA	-32.5164	28.0181	19.196	S7H004Q01 at Area 8 Springs B on Groot-keirivier	-32.5153	28.0156	8.23939	0.329416	GLORICH	119.037	0.00144222
453	Lam Siao Yai	Ban Ku Phra Ko Na	TH	15.57	103.823	19.193	Lam Sieo Yai River - Ban Ku Phra Ko Na	15.57	103.823	6.76613	0.323079	GEMSTAT	882.776	0.001442
454	San Antonio River	Goliard, Tx	US	28.6497	-97.3847	18.988	SAN ANTONIO RIVER AT GOLIAD, TX	28.6521	-97.3854	7.91698	0.298328	GLORICH	184.548	0.0014266
455	Sarugaishi Gawa	Yasuno	JP	39.39	141.16	18.862	????, ???????????	39.3771	141.236	7.2	0.126491	GLORICH	489.313	0.00141713
456	Rio Llobregat	Martorell	ES	41.4686	1.94785	18.811	LLOBREGOS EN MAS DE CULNERAL	41.7941	1.48549	8.04118	0.193839	GLORICH	155.867	0.0014133
457	Nueces River	Near Three Rivers, Tx	US	28.4275	-98.1781	18.131	NUECES RIVER NR THREE RIVERS, TX	28.4313	-98.1769	7.86973	0.287516	GLORICH	196.797	0.00136221
458	Eai Gawa	Arao	JP	38.58	140.98	17.974	???, ??????????????30m	38.5383	140.93	6.9	0.0894427	GLORICH	735.833	0.00135041
459	Northeast Margaree River	Margaree Valley	CA	46.3694	-60.9767	17.191	NORTHEAST MARGAREE RIVER AT BRIDGE (WSC GAUGE)	46.3649	-60.977	6.89258	0.520919	GLORICH	743.3	0.00129159
460	Mfolozi	State Land	ZA	-28.4456	32.3251	17.075	W2H032Q01 Umfolozi River at State Land/monzi	-28.448	32.3146	8.23065	0.299169	GLORICH	120.46	0.00128287
461	La Trobe River	Kilmany South	AU	-38.1392	146.919	16.683	LATROBE RIVER @ KILMANY SOUTH	-38.14	146.919	7.09578	0.367007	GLORICH	563.821	0.00125342
462	Bergrivier	Drieheuvels	ZA	-33.1308	18.8628	16.576	G1H013Q01 at Drieheuvels on Bergrivier	-33.1355	18.8609	7.1174	0.668116	GLORICH	547.484	0.00124538
463	Pawcatuck River	Westerly, R.I.	US	41.3837	-71.8331	16.563	PAWCATUCK RIVER AT WESTERLY, RI	41.3827	-71.8354	6.69163	0.513486	GLORICH	976.905	0.0012444
464	Roseway River	Lower Ohio	CA	43.8383	-65.37	16.526	ROSEWAY RIVER (WSC GAUGE), LOWER OHIO	43.8351	-65.3689	4.42561	0.206494	GLORICH	21293.9	0.00124162
465	River Exe	Thorverton	GB	50.8042	-3.51131	16.287	Exe River	50.8036	-3.51194	7.58734	0.3649	GEMSTAT	288.942	0.00122367
466	Glenelg River	Dartmoor	AU	-37.9247	141.281	16.023	GLENELG RIVER @ DARTMOOR	-37.9273	141.286	7.6516	0.425325	GLORICH	264.761	0.00120383
467	Sungai Linggi	Sua Betong	MY	2.5	101.97	15.922	Linggi River	2.60833	101.946	6.47063	0.551824	GEMSTAT	1319.43	0.00119624
468	River Leven	Hrs Bannons Bridge	AU	-41.2512	146.09	15.451	LEVEN RIVER AT BANNONS BRIDGE - Station No. 14207	-41.2524	146.09	7.2684	0.62015	GLORICH	445.848	0.00116086
469	Purificacion	El Barretal Ii	MX	24.1125	-99.1325	15.421	Rio Purificacion, El Barretal	24.1811	-99.3238	7.84622	0.398437	GEMSTAT	203.192	0.0011586
470	Great Fish River	Rietfontyn	ZA	-32.0858	25.5758	15.167	Q3H005Q01 at Rietfontyn Waaikraal on Groot-visrivier	-32.0857	25.5772	7.96798	0.47027	GLORICH	172.181	0.00113952
471	Demer	Aarschot	BE	50.9877	4.82232	15.137	397000 In Demer In Lummen	50.9611	5.13157	7.46414	0.187626	GEMSTAT	341.646	0.00113727
472	Lam Choen	Ban Tha Dua	TH	16.4933	102.128	15.009	Lam Choen - Ban Tha Dua	16.4933	102.128	7.86122	0.329352	GEMSTAT	199.086	0.00112765
473	Lakselva	Skoganvarre	NO	69.8366	25.0915	14.783	Lakselv River - Finnmark	69.9453	24.9564	6.925	0.330404	GEMSTAT	711.235	0.00111067
474	Natori Gawa	Natori-Bashi	JP	38.2	140.89	14.456	???, ?????????????????	38.2132	140.833	7.06667	0.150555	GLORICH	586.596	0.0010861
475	River Mersey	Ashton Weir	GB	53.4383	-2.34409	14.198	Mersey River	53.3869	-2.57639	7.30417	0.22626	GEMSTAT	424.681	0.00106672
476	Orkla	Naeverdal	NO	63.29	9.73	14.005	Orkla Ved Vormstad	63.2006	9.77194	7.36243	0.236937	GEMSTAT	392.326	0.00105222
477	Mangawhero River	Ore Ore	NZ	-39.5697	175.264	13.74	Whanganui at Paetawa	-39.7896	175.144	7.67214	0.192601	GLORICH	257.466	0.00103231
478	River Maigue	Castleroberts	IE	52.5434	-8.76742	13.335	At Castleroberts_Br	52.5434	-8.76741	8.22613	0.190172	GEMSTAT	121.203	0.00100188
479	Clare River	Corrofin	IE	53.4376	-8.86384	13.235	Clare River - At Corofin Bridge	53.4378	-8.86257	7.90741	0.292493	GEMSTAT	186.966	0.000994365
480	Rio Grande De Manati	Highway 2 Near Manati	PR	18.4291	-66.5266	12.88	RIO GRANDE DE MANATI AT HWY 2 NR MANATI, P.R.	18.4351	-66.5269	7.58771	0.298432	GLORICH	288.795	0.000967693
481	Rio Vasa Barris	Fazenda Belem	BR	-10.9431	-37.3469	12.741	FAZENDA BEL脡M	-10.9394	-37.3438	7.81844	0.838878	GLORICH	211.015	0.00095725
482	Margaree River	Near Upper Margaree	CA	46.2233	-61.1367	12.551	SOUTHWEST MARGAREE RIVER AT BRIDGE (WSC GAUGE)	46.223	-61.1358	7.04393	0.459624	GLORICH	605.019	0.000942975
483	Matsuura Gawa	Mutabe	JP	33.36	130.01	12.002	???, ?????????????	33.3637	130.007	6.90833	0.183196	GLORICH	727.54	0.000901728
484	Rio Apodi	Pedra De Abelhas (Brejo Apodi)	BR	-5.5933	-37.6842	11.801	PEDRA DE ABELHAS (BREJO APODI)	-5.59348	-37.673	5.70657	0.487759	GLORICH	3729.64	0.000886627
485	Torrent La Roya	Breil Sur Roya	FR	43.937	7.5156	11.726	Roya 脿 Breil sur Roya, Amont fronti猫re - Aval air*	43.8935	7.53122	8.2913	0.157517	GLORICH	110.922	0.000880992
486	Orekilsalven	Gunnarsbro	SE	58.6251	11.7025	11.636	HAJUMS脛LVEN	58.6382	11.7423	6.62	0.240416	GLORICH	1076.86	0.00087423
487	Rocky River	Near Colinet	CA	47.2247	-53.5683	11.236	ROCKY RIVER ABOVE FALLS ABOVE HWY 6 BRIDGE	47.2267	-53.5692	6.21286	0.397415	GLORICH	1873.41	0.000844177
488	Mbashe	Gxwali Bomvu	ZA	-31.7997	28.333	11.186	T1H013 @ Gxwali Bomvu on Mbashe	-31.7983	28.3315	7.71625	0.320355	GLORICH	242.476	0.000840421
489	Kavlingean	Hogsmolla	SE	55.7796	13.0767	10.984	Kävlingeån Högsmölla	55.7797	13.0766	7.83136	0.098374	GEMSTAT	207.34	0.000825244
490	Enningdalselva	Vassbotten	SE	58.8771	11.5368	10.879	Enningdalsälv N.Bullaren	58.8772	11.5374	6.69833	0.183203	GEMSTAT	968.036	0.000817355
491	River Carron	New Kelso	GB	57.4295	-5.43	10.766	Carron River	57.4278	-5.42833	6.56385	0.393978	GEMSTAT	1162.32	0.000808866
492	Salinas River	Near Spreckels, Ca	US	36.6311	-121.672	10.743	SALINAS R NR SPRECKELS CA	36.6313	-121.673	7.72727	0.515554	GLORICH	238.868	0.000807137
493	Ashida Gawa	Yamate	JP	34.49	133.343	10.534	???, ??????????	34.568	133.232	7.17857	0.157766	GLORICH	503.783	0.000791435
494	Rio Grande De Anasco	Near San Sebastian	PR	18.2827	-67.051	10.326	RIO GRANDE DE ANASCO NR SAN SEBASTIAN, P.R.	18.2814	-67.052	7.8223	0.380086	GLORICH	209.91	0.000775808
495	Palico River	Bilaran,Nasugbu	PH	14.06	120.69	10.304	Palico River	14.049	120.693	7.79	NA	GLORICH	219.336	0.000774155
496	Ci Tarum	Majalaya	ID	-7.05056	107.756	10.295	Citarum River - At Nanjung	-6.98639	107.583	7.30706	0.410513	GEMSTAT	423.013	0.000773479
497	Tracunhaem, Rio	Engenho Itapissirica	BR	-7.6131	-35.0647	10.131	ENGENHO ITAPISSIRICA	-7.61483	-35.0646	6.72924	0.738577	GLORICH	928.187	0.000761157
498	Acheron River	Taggerty	AU	-37.3177	145.714	9.757	ACHERON RIVER @ TAGGERTY	-37.3184	145.714	6.69952	0.403203	GLORICH	966.479	0.000733058
499	Alafia River	Lithia, Fla.	US	27.8722	-82.2112	9.398	ALAFIA RIVER AT LITHIA, FLA.	27.8731	-82.2141	7.24581	0.538666	GLORICH	459.761	0.000706086
500	Rio Ceara-Mirim	Ceara-Mirim	BR	-5.6333	-35.4167	9.228	CEARÁ-MIRIM	-5.62271	-35.4143	7.33429	0.337533	GLORICH	407.636	0.000693313
501	Wallace River	Near Wentworth Centre	CA	45.6783	-63.5597	8.889	WALLACE RIVER WEST BRANCH AT GREENVILLE STA.	45.6481	-63.6732	7.3	NA	GLORICH	427.094	0.000667844
502	Karuah River	Hrs Booral	AU	-32.48	151.96	8.529	KARUAH R AT BOORAL	-32.4773	151.96	7.13697	0.356837	GLORICH	533.111	0.000640796
503	Shigenobu-Gawa	Deai	JP	33.8	132.73	8.28	???, ?????????	33.8656	132.822	7.46667	0.137069	GLORICH	340.473	0.000622089
504	Lamprey River	Near Newmarket, N.H.	US	43.1026	-70.9526	8.214	NORTH RIVER AT NH 152, NR NOTTINGHAM, NH	43.0981	-71.0594	6.55	0.353553	GLORICH	1184.41	0.00061713
505	Barnard River	Hrs Mackay	AU	-31.77	151.9	7.991	BARNARD D/S BACK R	-31.5563	151.344	7.15	NA	GLORICH	523.744	0.000600376
506	Gellibrand River	Hrs Burrupa	AU	-38.7	143.25	7.966	GELLIBRAND RIVER @ BURRUPA	-38.6981	143.252	6.84498	0.360758	GLORICH	793.006	0.000598497
507	Mtata	Norwood (27663602)	ZA	-31.5842	28.7842	7.951	Mtata River at The Bridge Below Umtata Prison	-31.5814	28.7889	7.205	0.33455	GLORICH	485.997	0.00059737
508	Rio De La Plata	Highway 2 Near Toa Alta	PR	18.4094	-66.2604	7.942	RIO DE LA PLATA AT HWY 2 NR TOA ALTA, P.R.	18.4105	-66.2602	7.44772	0.326948	GLORICH	349.362	0.000596694
509	Tarwin River	Hrs Meeniyan	AU	-38.582	145.99	7.824	TARWIN RIVER @ MEENIYAN	-38.5818	145.994	7.16525	0.416274	GLORICH	512.993	0.000587829
510	Tetagouche River	Near West Bathurst	CA	47.6558	-65.6936	7.65	TETAGOUCHE RIVER, 500 M BELOW BRIDGE	47.6523	-65.6943	7.37	0.598238	GLORICH	388.31	0.000574756
511	Lavaca River	Near Edna, Tx	US	28.96	-96.6864	7.529	LAVACA RIVER NR EDNA, TX	28.9604	-96.6896	7.90807	0.268555	GLORICH	186.797	0.000565665
512	Lepreau River	Lepreau	CA	45.1697	-66.4681	7.431	LEPREAU RIVER AT HWY 1 BRIDGE, LEPREAU (WSC GAUGE)	45.1693	-66.4691	5.82359	0.488844	GLORICH	3180.89	0.000558302
513	Tambo River	D/S Ramrod Creek	AU	-37.6725	147.87	7.425	TAMBO RIVER @ D/S OF RAMROD CREEK	-37.6732	147.873	7.41901	0.488003	GLORICH	363.269	0.000557851
514	Orara River	Hrs Glenreagh	AU	-30.07	152.98	7.409	ORARA R AT GLENREAGH	-30.0684	152.986	6.82	NA	GLORICH	820.409	0.000556649
515	Hopkins River	Hopkins Falls	AU	-38.3354	142.625	7.265	HOPKINS RIVER @ HOPKINS FALLS	-38.331	142.628	8.12024	0.402219	GLORICH	139.977	0.00054583
516	Umgeni	Inanda Loc.	ZA	-29.6424	30.6886	7.245	U2H055Q01 at Inanda Location Egugwini on Mgeni	-29.64	30.6898	8.14608	0.375487	GLORICH	135.143	0.000544328
517	River Almond	Craigiehall	GB	55.9631	-3.33853	6.317	Almond River - Graigiehall	55.93	-3.02	7.77294	0.248034	GEMSTAT	224.484	0.000474606
518	Black River	Hrs South Forest	AU	-40.8725	145.298	6.012	BLACK RIVER AT SOUTH FOREST - Station No. 14213	-40.8716	145.297	6.19956	0.850384	GLORICH	1907.6	0.00045169
519	Barwon River	Pollocksford	AU	-38.1434	144.187	5.714	BARWON RIVER @ POLLOCKSFORD	-38.1396	144.19	7.88765	0.493282	GLORICH	192.058	0.000429301
520	Hakataramea River	Above Main Highway Bridge	NZ	-44.7248	170.491	5.652	Hakatakamea above MH Br.	-44.7264	170.49	8.08167	0.479826	GLORICH	147.516	0.000424643
521	Odense A	Ns Ejby Molle	DK	55.3999	10.423	5.622	Odense River - Nr Broby	55.25	10.2394	7.8555	0.145262	GEMSTAT	200.641	0.000422389
522	Bear River East Branch	Bear River	CA	44.5667	-65.6333	5.524	BEAR R. E BRANCH AT TAILRACE OF RIDGE POWER PLANT	44.565	-65.6177	5	NA	GLORICH	9749.81	0.000415026
523	Kukasjoki	Kukkasjaervi	SE	66.1117	23.3236	5.421	Kukkasjärvi	66.1138	23.32	6.46533	0.194662	GEMSTAT	1328.96	0.000407288
524	Rio Piranji	Cristais	BR	-4.5006	-38.3608	5.405	CRISTAIS	-4.50211	-38.3605	6.84	1.27279	GLORICH	798.395	0.000406086
525	River Axe	Whitford	GB	50.7528	-3.04742	5.335	Axe River - Whitford Bridge	50.75	-2.93	8.05316	0.273144	GEMSTAT	153.346	0.000400826
526	Mtamvuna	Gundrift (27663201)	ZA	-30.7342	29.8286	5.023	T4H001Q01 Mtamvuna River at Gundrift/mtamvuna	-30.7355	29.8275	7.28365	0.635888	GLORICH	436.697	0.000377385
527	Branch River	Forestdale, R.I.	US	41.9965	-71.5626	4.994	BLACKSTONE RIVER AT MILLVILLE, MA	42.0225	-71.5687	6.67736	0.434045	GLORICH	996.048	0.000375207
528	Bemm River	Hrs Princes Hwy	AU	-37.606	148.9	4.915	BEMM RIVER @ PRINCES HIGHWAY	-37.606	148.902	6.97244	0.480065	GLORICH	666.795	0.000369271
529	Avon River	Stratford	AU	-37.9686	147.076	4.883	AVON RIVER @ STRATFORD	-37.9732	147.081	7.14439	0.322137	GLORICH	527.759	0.000366867
530	Lergue	Lodeve	FR	43.7273	3.32321	4.583	Lergue 脿 Lod猫ve, Aval Ch芒teau Mallet	43.756	3.32701	8.28	0.0882367	GLORICH	112.641	0.000344328
531	Brodribb River	Hrs Sardine Creek	AU	-37.512	148.55	4.21	BRODRIBB RIVER @ SARDINE CREEK	-37.5104	148.548	7.13867	0.456359	GLORICH	531.875	0.000316304
532	Huai Lam Pa Thao	Ban Tao Ton	TH	15.9583	102.03	4.201	Huai Pa Tho River - Ban Tad Ton	15.9303	102.03	7.29917	0.395812	GEMSTAT	427.578	0.000315627
533	Umkhuze	Morrisvale (27650111)	ZA	-27.6603	32.4225	4.056	W3H011Q01 Mkuze River at Morrisvale/lower Mkuze	-27.6638	32.4232	7.75207	0.470925	GLORICH	230.948	0.000304733
534	Choptank River	Near Greensboro, Md.	US	38.9972	-75.7858	4.042	CHOPTANK R NR GREENSBORO, MD	38.9974	-75.7854	6.4818	0.593667	GLORICH	1299.53	0.000303681
535	Berkel	Ammeloe	DE	52.081	6.77442	3.854	Berkel at Oldenkott	52.0939	6.7563	7.73283	0.299134	GLORICH	237.071	0.000289557
536	Swan River	Hrs The Grange	AU	-42.0467	148.075	3.451	SWAN RIVER AT THE GRANGE - Station No. 2200	-42.0474	148.077	7.26696	0.487117	GLORICH	446.725	0.000259279
537	Keiskammarivier	Farm 7	ZA	-33.1853	27.3906	3.227	Belmont at R72 Howard Shaw Bridge on Keiskamma	-33.1855	27.3954	7.87824	0.42291	GLORICH	194.533	0.000242449
538	Northwest Brook	Northwest Pond	CA	46.8522	-53.3031	3.136	TREPASSEY WATER SUPPLY - NORTHEAST BROOK	46.7688	-53.3521	6.05	0.191485	GLORICH	2337.89	0.000235612
539	Beaverbank River	Near Kinsac	CA	44.8517	-63.665	3.044	BEAVERBANK RIVER NEAR KINSAC	44.8522	-63.6645	6.4	NA	GLORICH	1452.44	0.0002287
540	Saddle River	Lodi, N.J.	US	40.8903	-74.0806	2.917	SADDLE RIVER AT LODI NJ	40.8903	-74.0806	7.5	NA	GLORICH	325.383	0.000219159
541	Rio Sao Goncalo	Sitios Novos	BR	-3.75	-38.95	2.888	UMARITUBA NOVA	-3.67056	-38.9854	6.945	0.374767	GLORICH	692.15	0.00021698
542	Mzintlava	Slang Fontein (27663504)	ZA	-30.5683	29.4222	2.876	T3H004Q01 Mzimntlana River at Slangfontein/kokstad	-30.5683	29.4228	7.52309	0.60831	GLORICH	315.323	0.000216078
543	Maribyrnong River	Keilor	AU	-37.7277	144.836	2.767	MARIBYRNONG RIVER EAST OF ST ALBANS RD U/S OF WIER [003030] QNH	-37.7305	144.831	7.62935	0.457589	GLORICH	272.893	0.000207889
544	Curdie River	Hrs Curdie	AU	-38.445	142.96	2.665	CURDIES RIVER @ CURDIE	-38.4438	142.964	7.69384	0.440897	GLORICH	249.98	0.000200225
545	Gouritz	Zeekoedrift	ZA	-33.9803	21.6533	2.664	J4H002Q01 Gourits River at Zeekoedrift/die Poort	-33.981	21.6522	8.10754	0.412302	GLORICH	142.415	0.00020015
546	Mhlatuze	Umhlatuze Valley	ZA	-28.8013	31.9554	2.456	Mhlatuze River	-28.7978	31.9726	7.8	NA	GLORICH	216.373	0.000184523
547	Merri River	Woodford	AU	-38.316	142.48	2.252	MERRI RIVER @ WOODFORD	-38.3147	142.485	7.92063	0.289136	GLORICH	183.633	0.000169196
548	Rio Grande De Patillas	Lago Patillas	PR	18.0189	-66.0216	2.227	RIO GRANDE DE PATILLAS NR PATILLAS, P.R.	18.0354	-66.0351	7.77619	0.461732	GLORICH	223.494	0.000167318
549	Aille	Vidauban (Le Baou)	FR	43.3941	6.45291	2.195	Aille 脿 Vidauban, Lieu dit Le Clos d'Aille	43.4071	6.47275	7.83571	0.224934	GLORICH	206.114	0.000164914
550	Real Martin	La Crau (Decapris)	FR	43.1856	6.11118	2.18	R茅al Martin 脿 Hy猫res	43.1566	6.12753	8.025	0.05	GLORICH	159.334	0.000163787
551	Little Swanport River	Upstream Tasman Hwy	AU	-42.34	147.89	2.12	LITTLE SWANPORT RIVER 150m D/S OLD WEIR - Station No. 2235	-42.3348	147.906	7.82578	0.41611	GLORICH	208.917	0.000159279
552	Wingan River	Hrs Wingan Inlet National Park	AU	-37.689	149.49	2.09	WINGAN RIVER @ WINGAN INLET NATIONAL PARK	-37.689	149.494	6.53714	0.552772	GLORICH	1205.31	0.000157025
553	River Fal	Tregony	GB	50.266	-4.91844	2.047	Fal River - Tregony Gauging Station	50.27	-4.9	7.19742	0.265053	GEMSTAT	491.034	0.000153794
554	Leven, River	Leven Bridge	GB	54.502	-1.31542	1.879	Leven River	55.9706	-4.58222	7.05497	0.25746	GEMSTAT	595.999	0.000141172
555	Darlots Creek	Hrs Homerton Br	AU	-38.15	141.77	1.869	DARLOT CREEK @ HOMERTON BRIDGE	-38.152	141.769	7.54211	0.386633	GLORICH	307.274	0.000140421
556	Buffalo River	Mhlabati	ZA	-32.9916	27.64	1.816	R2H027Q01 at Mhlabati Needs Camp on Buffalo River	-32.9934	27.6183	8.01915	0.35177	GLORICH	160.606	0.000136439
557	Umdloti	Roodekrans (27662302)	ZA	-29.6031	31.0164	1.81	U3H003Q01 Mdloti Riv at Roodekrans/hazelmere Dam Inflow (mh	-29.5983	31.0063	7.4868	0.411311	GLORICH	331.276	0.000135988
558	Wyong Creek	Hrs Gracemere	AU	-33.2724	151.359	1.681	WYONG R AT GRACEMERE	-33.2688	151.362	6.78309	0.225059	GLORICH	862.642	0.000126296
559	Bass River	Hrs Glen Forbes South	AU	-38.467	145.51	1.638	BASS RIVER @ GLEN FORBES SOUTH	-38.4648	145.516	7.12317	0.368008	GLORICH	543.211	0.000123065
560	Ansons River	Downstream Big Boggy Creek	AU	-41.0464	148.217	1.577	ANSONS RIVER D/S BIG BOGGY CREEK - Station No. 2214	-41.0477	148.215	6.5442	0.47348	GLORICH	1193.79	0.000118482
561	Cann River	Hrs Weeragua	AU	-37.373	149.2	1.549	CANN RIVER (WEST BRANCH) @ WEERAGUA	-37.373	149.198	7.20952	0.373724	GLORICH	483.016	0.000116379
562	Scotts Creek	Hrs Curdie (Digneys Br)	AU	-38.448	142.99	1.534	SCOTTS CREEK @ CURDIE (DIGNEYS BRIDGE)	-38.448	142.99	7.32967	0.390365	GLORICH	410.206	0.000115252
563	Powlett River	Hrs D/S Foster Ck Junction	AU	-38.559	145.71	1.444	POWLETT RIVER @ D/S FOSTER CREEK JUNCTION	-38.5563	145.714	7.53611	0.42504	GLORICH	309.789	0.00010849
564	Little Yarra River	Yarra Junction	AU	-37.7807	145.62	1.43	LITTLE YARRA RIVER @ YARRA JUNCTION	-37.7773	145.623	6.78041	0.412996	GLORICH	865.798	0.000107438
565	Raan	Broedebacken	SE	55.9954	12.7983	1.332	Raan River - At Helsingborg	56	12.78	7.82861	0.164806	GEMSTAT	208.115	0.000100075
566	Velise Jogi	Valgu	EE	58.8179	24.645	1.225	Velise Jõgi: Valgu	58.8169	24.5925	8.00217	0.246557	GEMSTAT	164.358	9.20361e-05
567	Mpambanyoni	Umbeli Belli	ZA	-30.274	30.696	1.197	U8H003Q01 Mpambanyoni River at Umbeli Belli	-30.2727	30.6931	8.28918	0.27784	GLORICH	111.243	8.99324e-05
568	Kennedys Creek	Hrs Kennedys Ck	AU	-38.588	143.26	1.155	KENNEDYS CREEK @ KENNEDYS CREEK	-38.5893	143.256	6.85945	0.314195	GLORICH	777.556	8.67769e-05
569	Tarra River	Hrs Yarram	AU	-38.538	146.68	0.987	TARRA RIVER @ YARRAM	-38.5391	146.677	6.94981	0.35671	GLORICH	687.637	7.41548e-05
570	Combienbar River	Hrs Combienbar	AU	-37.44	148.98	0.969	COMBIENBAR RIVER @ COMBIENBAR	-37.4396	148.982	7.02086	0.374241	GLORICH	624.302	7.28024e-05
571	San Luis Rey River	Oceanside, Ca	US	33.2181	-117.36	0.964	SAN LUIS REY R A OCEANSIDE CA	33.2186	-117.361	8.058	0.260993	GLORICH	152.341	7.24267e-05
572	Eumeralla River	Hrs Codrington	AU	-38.258	141.94	0.918	EUMERALLA RIVER @ CODRINGTON	-38.2602	141.944	8.07895	0.279147	GLORICH	148.063	6.89707e-05
573	Waikohu River	No 1 Br	NZ	-38.415	177.562	0.844	Waikohu at No. 1 Br.	-38.4147	177.561	8.26143	0.253221	GLORICH	115.522	6.3411e-05
574	Kowie River	Bathurst (27681101)	ZA	-33.5067	26.7442	0.834	P4H001Q01 Kowie River at Bathurst/wolfscrag	-33.506	26.7481	8.07766	0.435912	GLORICH	148.322	6.26597e-05
575	East River	St.Margarets Bay	CA	44.685	-63.8717	0.769	INDIAN RIVER AT SANDY LAKE OUTLET	44.7233	-63.9102	6.2	NA	GLORICH	1906.46	5.77761e-05
576	Agnes River	Hrs Toora	AU	-38.64	146.37	0.749	AGNES RIVER @ TOORA	-38.64	146.373	7.00909	0.251685	GLORICH	634.374	5.62735e-05
577	Gqunube	Outspan (27672101)	ZA	-32.8017	27.8553	0.562	R3H001Q01 Gqunube River at Outspan	-32.8016	27.8604	7.78418	0.422507	GLORICH	221.077	4.22239e-05
578	Vodja Jogi	Vodja	EE	58.9389	25.6444	0.455	Vodja Jõgi: Vodja	58.9391	25.6444	7.757	0.425269	GEMSTAT	229.404	3.41848e-05
579	Kariegarivier	Smithfield	ZA	-33.5523	26.6018	0.346	P3H001Q01 Kariega River at Smithfield/lower Waterford	-33.5522	26.6059	7.9686	0.377082	GLORICH	172.036	2.59955e-05
580	Boesmansrivier	Donker Hoek Alicedale	ZA	-33.3292	26.0775	0.309	P1H003Q01 Boesmans River at Donker Hoek/alicedale	-33.3282	26.0773	8.27714	0.506718	GLORICH	113.08	2.32156e-05
581	Love Creek	Hrs Gellibrand	AU	-38.483	143.57	0.259	LOVE CREEK @ GELLIBRAND	-38.4852	143.574	6.96568	0.408984	GLORICH	672.954	1.94591e-05
582	Langtjernbekken	Langtjernbekken	NO	60.3727	9.72746	0.096	Langtjernet, Utløp	60.3726	9.72662	4.96474	0.238599	GEMSTAT	10228.7	7.21262e-06
											Discharge-weighted mean		942.703	pmol/kg

## Sheet: Table_3
SUPPLEMANTARY DATA FOR
Overlooked riverine contributions of dissolved neodymium and hafnium to the Amazon estuary and oceans
Antao Xu1*, Ed Hathorne1, Georgi Laukert1, 2, 3, Martin Frank1
1 GEOMAR Helmholtz Centre for Ocean Research Kiel, Kiel, Germany
2 Department of Oceanography, Dalhousie University, Halifax, Canada
3 Woods Hole Oceanographic Institution, Woods Hole, USA
* Corresponding author. E-mail address: axu@geomar.de.
Table. 3 Maximum Nd removal percentage together with pH and dissolved organic carbon data
River estuary	Month of Nd data sampling	Maximum Nd removal	Pore size	pH	DOC	Month of DOC data sampling	Nd removal references	DOC references	pH references	Discharge	weight
			um		mg/L
Amazon	Apr-May	0.91	0.45	6.9	4.2	Apr-May	this study	Hollister et al., 2021	Rousseau et al., 2015	206000	15.4771
Congo	Nov-Dec	0.57	0.45	6.2	13.5	Nov	Rahlf et al., 2021	N’kaya et al., 2020	Wang et al., 2013	42800	3.21563
Changjiang	Aug	0.9	0.4	7.9	2.1	Aug	Che et al., 2022	Wang et al., 2012	Zhai et al., 2007	29934.2	2.249
Pará	Apr-May	0.95	0.45		4.2	Apr-May	this study	Hollister et al., 2021		20946	1.5737
Lena	Sept	0.72	0.45	7.2	6.6	Sept	Laukert et al., 2017	Juhls et al., 2020	HÖlemann et al., 2005	16838	1.26506
Fly	Feb	0.87	0.22	7.9	3.1	2-year average	Sholkovitz and Szymczak, 2000	Ferguson et al., 2011	Ferguson et al., 2011	6500	0.488355
Sepik	Aug	0.81	0.22	7.3	3.4	―	Sholkovitz and Szymczak, 2000	Rousseau et al., 2015	Rousseau et al., 2015	3900.33	0.293038
Great Whale	Aug	0.66	0.22	6.8	8.2	Jul-Aug	Goldstein and Jacobsen, 1988	Guéguen et al., 2011	Goldstein and Jacobsen, 1987	1204.98	0.0905319
Gironde	―	0.68	0.45	7.9	3.3	Feb	Martin et al., 1976	Huguet et al., 2009	Masson et al., 2007	671.096	0.0504204
Chao Phraya	Nov	0.58	0.04	7.5	6.5	Jan	Nozaki et al., 2000	Burnett et al., 2007	Kulthanan et al., 2013	400	0.0300526
Tamar	Aug	0.65	0.45	7.5	6.2	Jul	Elderfield, 1990	Miller, 1999	Elderfield et al., 1990	22.927	0.00172254
Mullica	Sept	0.81	0.7		4.2	Aug	Elderfield, 1990	Yan et al., 1990
Global river discharge										1331000
Discharge-weighted mean		0.853939

## Sheet: Table_4
SUPPLEMANTARY DATA FOR
Overlooked riverine contributions of dissolved neodymium and hafnium to the Amazon estuary and oceans
Antao Xu1*, Ed Hathorne1, Georgi Laukert1, 2, 3, Martin Frank1
1 GEOMAR Helmholtz Centre for Ocean Research Kiel, Kiel, Germany
2 Department of Oceanography, Dalhousie University, Halifax, Canada
3 Woods Hole Oceanographic Institution, Woods Hole, USA
* Corresponding author. E-mail address: axu@geomar.de.
Table. 4 Maximum Nd removal percentage predicted by dissolved organic carbon data from global datasets
NO.	River	Station	country	Latitude	Longitude	Discharge (m3/s)	DOC_site	DOC_Latitude	DOC_Longitude	DOC	SD	DOC data source	Nd removal_predicted	weight
1	Amazon River	Obidos - Porto	BR	-1.9472	-55.5111	169184	Obidos	-1.93547	-55.519	4.24	0.927602	GLORICH	0.796854	12.7111
2	Congo River	Brazzaville	CG	-4.27	15.32	41126	Brazzaville/Kinshasa	-4.28	15.3	12.78	1.56	N’kaya et al., 2020	0.532627	3.08985
3	Rio Orinoco	Puente Angostura	VE	8.15	-63.6	31208.5	Orinoco near Ciudad Bolivar	8.14319	-63.6074	6.17125	2.43845	GLORICH	0.737102	2.34474
4	Yangtze River	Datong	CN	30.77	117.62	25069.3	Changjiang River at Nanjing	32.1064	118.736	8.1125	2.85629	GLORICH	0.677039	1.88349
5	Brahmaputra River	Bahadurabad	BD	25.18	89.67	23833.2	Kakua union station	24.3316	89.804	1.93333	0.96515	Niloy et al., 2022	0.868223	1.79063
6	Yenisey	Igarka	RU	67.43	86.48	19251.3	Yenisey	69.4104	86.0421	7.77164	3.37967	GLORICH	0.687586	1.44638
7	Mississippi River	Vicksburg, Ms	US	32.315	-90.9058	17814.6	MISSISSIPPI RIVER AT BELLE CHASSE, LA.	29.8565	-89.9772	5.90714	2.63598	GLORICH	0.745273	1.33844
8	Rio Parana	Isla Pati (Brazo Prinzipal)	AR	-29.48	-59.58	17160.3	Santa Fe	-31.61	-60.7	9.3	NA	Depetris and Paolini, 1991	0.640298	1.28928
9	Lena	Kyusyur (Kusur)	RU	70.68	127.39	17037.4	Lena	66.8054	123.545	9.28467	3.32907	GLORICH	0.640772	1.28004
10	Ob'	Kazhum Mis-Yamo	RU	64.67	65.63	13257.1	Ob	66.6065	66.5469	9.57041	1.54779	GLORICH	0.631932	0.996027
11	Ganges River	Paksey	BD	24.08	89.03	12147	Ganges-Brahmaputra Confluence at Aricha	23.7815	89.81	5.11143	6.41322	GLORICH	0.769892	0.912622
12	Rio Tapajos	Jatoba	BR	-5.1525	-56.8539	10772.7	Rio Tapajos at Itaituba	-4.29775	-55.9771	4.58669	4.32755	GLORICH	0.786128	0.809367
13	Mackenzie River	Arctic Red River	CA	67.4583	-133.745	9229.51	Mackenzie River above Arctic Red River	67.4561	-133.737	6.56071	3.61843	GEMSTAT	0.725051	0.693427
14	Saint Lawrence River	Lasalle	CA	45.415	-73.6236	8527.63	St. Lawrence River - Massena NY	45.0061	-74.7953	2.64108	2.2735	GEMSTAT	0.846325	0.640694
15	Columbia River	Beaver Army Terminal Near Quincy, Or	US	46.1815	-123.184	6696.6	COLUMBIA RIVER AT PORT WESTWARD, NEAR QUINCY, OR	46.1812	-123.183	1.763	0.46742	GEMSTAT	0.873493	0.503125
16	Yukon River	Pilot Station, Ak	US	61.9337	-162.883	6605.04	YUKON R AT PILOT STATION AK	61.9337	-162.883	6.32681	3.8177	GEMSTAT	0.732288	0.496246
17	River Niger	Lokoja	NG	7.8	6.7667	5039.86	Niger at Lokoja	7.8105	6.75623	3.48583	1.40875	GLORICH	0.820188	0.378652
18	Kolyma	Kolymskaya	RU	68.73	158.72	3305.22	Kolyma	68.7584	161.303	6.00781	2.13809	GLORICH	0.742158	0.248326
19	Indus River	Kotri	PK	25.37	68.37	2887.63	Indus River	25.6147	68.3815	11.3863	10.4891	GLORICH	0.575749	0.216952
20	Nile River	Aswan Dam	EG	23.96	32.9	2763.98	Nile at Edfina barrage	31.3017	30.5186	5.05	4.87904	GLORICH	0.771793	0.207662
21	Fraser River	Hope	CA	49.3806	-121.451	2720.33	Fraser River (Main Arm) at Gravesend Reach - Buoy	49.1485	-123.039	2.90981	1.39966	GEMSTAT	0.83801	0.204382
22	Rhine River	Rees	DE	51.7569	6.39539	2247.1	Rhine River - at German Frontier	51.85	6.10167	2.56324	0.748176	GEMSTAT	0.848733	0.168828
23	Usumacinta	Boca Del Cerro	MX	17.4333	-91.4833	1930.63	RIO USUMACINTA 8	17.9013	-91.916	1.97089	1.59765	GEMSTAT	0.867061	0.145051
24	Ottawa River	Au Barrage De Carillon	CA	45.57	-74.3928	1928.64	Ottawa River at Carillon (04310002)	45.5676	-74.3799	6.69961	0.496057	GEMSTAT	0.720754	0.144901
25	Maroni River	Langa Tabbetje	SR	5	-54.4	1895.34	Rio Maroni at Langa Tabiki	4.9862	-54.4441	5.84022	3.45621	GLORICH	0.747343	0.1424
26	Churchill River	Above Upper Muskrat Falls	CA	53.2478	-60.7892	1751.03	Churchill River above Upper Muskrat Falls	53.2478	-60.7892	4.48571	0.815181	GEMSTAT	0.789252	0.131557
27	Rhone	Beaucaire	FR	43.92	4.67	1652.92	RHÔNE À ARLES	43.6789	4.62292	2.25632	0.877516	GEMSTAT	0.858229	0.124187
28	Stikine River	Near Wrangell	CA	56.7077	-132.132	1588.32	STIKINE R NR WRANGELL AK	56.7064	-132.128	4.42222	4.61705	GLORICH	0.791216	0.119333
29	Susitna River	Susitna Station Ak	US	61.5442	-150.515	1426.72	SUSITNA R AT SUSITNA STATION AK	61.5491	-150.521	3.01429	2.65297	GEMSTAT	0.834778	0.107192
30	Yellow River	Shanxian	CN	34.82	111.15	1351.68	Huanghe River at Luokou	36.7275	116.997	8.2125	5.18113	GLORICH	0.673945	0.101554
31	Alsek River	Dry Bay Near Yakutat, Ak	US	59.1906	-138.327	1330.17	Alsek River	60.12	-137.97	0.714953	0.402774	GEMSTAT	0.905919	0.099938
32	Kuskokwim River	Crooked Creek, Alas.	US	61.8704	-158.103	1202.23	KUSKOKWIM R AT CROOKED CREEK AK	61.878	-158.088	4.80625	2.20317	GLORICH	0.779335	0.0903253
33	Susquehanna River	Conowingo, Md	US	39.6573	-76.175	1167.15	SUSQUEHANNA RIVER AT CONOWINGO, MD	39.6579	-76.1744	2.75033	1.28615	GEMSTAT	0.842945	0.0876901
34	Copper River	Near Chitina, Alas.	US	61.4651	-144.458	1073.61	COPPER R NR CHITINA AK	61.4653	-144.435	7.32222	6.41654	GLORICH	0.70149	0.0806622
35	Loire	Montjean	FR	47.38	-0.83	911.927	Loire River - Ingrandes	47.4033	-0.915833	6.85	1.811	GEMSTAT	0.716101	0.0685144
36	Alabama River	Claiborne, Ala.	US	31.5468	-87.5125	910.833	ALABAMA RIVER AT CLAIBORNE AL	31.5478	-87.5189	4.51323	1.39493	GLORICH	0.788401	0.0684322
37	Skeena River	Usk	CA	54.6306	-128.432	909.859	Skeena River at Usk	54.6344	-128.409	2.79478	1.88654	GEMSTAT	0.841569	0.0683591
38	Tombigbee River	Coffeeville L+D Near Coffeeville, Al	US	31.7585	-88.1292	831.92	TOMBIGBEE R BL COFFEEVILLE L&D NEAR COFFEEVILLE	31.7563	-88.1271	4.76091	1.22006	GLORICH	0.780737	0.0625034
39	Oyapok Fleuve	Maripa	GF	3.82	-51.88	831.4	Rio Oyapock at Saut Maripa	3.80229	-51.8816	6.19237	7.93631	GLORICH	0.736448	0.0624643
40	Saint John River	Below Mactaquac	CA	45.9622	-66.8308	812.856	St. John River - Mactaquac Dam	45.9505	-66.8691	6.61308	1.29662	GEMSTAT	0.723431	0.0610711
41	Nass River	Above Shumal Creek	CA	55.2639	-129.086	787.143	Nass	55.8233	-128.935	2.65	NA	GLORICH	0.846049	0.0591392
42	Elbe River	Neu Darchau	DE	53.2323	10.8888	694.613	Elbe River - at Geesthacht	53.4333	10.3667	5.38462	3.75815	GEMSTAT	0.76144	0.0521873
43	Glomma	Langnes	NO	59.6092	11.1181	692.819	GLOMMA VED SARPSFOSS	59.2779	11.1342	3.65	0.796869	GEMSTAT	0.815109	0.0520525
44	Riviere Saint-Maurice	Centrale De Grande-Mere	CA	46.6158	-72.6794	692.725	Saint-Maurice River, water intake at Trois-Rivières Water Treatment Plant (05010007)	46.382	-72.6105	6.40241	0.876184	GEMSTAT	0.729949	0.0520455
45	Peel River	Above Fort Mcpherson	CA	67.2489	-134.883	684.637	Peel River above Fort Macpherson	67.2206	-134.946	5.31475	4.46045	GEMSTAT	0.763602	0.0514378
46	Sacramento River	Sacramento, Ca	US	38.5866	-121.505	673.555	Sacramento River - Freeport CA	38.4556	-121.502	2.11475	0.851554	GEMSTAT	0.86261	0.0506052
47	Rio Garona	Mas-D'Agenais	FR	44.42	0.23	671.096	Garonne River - Couthures	44.5167	0.0666667	3.41212	2.56338	GEMSTAT	0.822469	0.0504204
48	Nushagak River	Ekwok, Ak	US	59.3484	-157.475	665.512	NUSHAGAK R AT EKWOK AK	59.332	-157.46	3.40909	1.22266	GLORICH	0.822563	0.0500009
49	Apalachicola River	Near Sumatra, Fla	US	29.9494	-85.0155	639.224	Apalachicola River - Sumatra FL	29.9492	-85.0156	4.82927	2.31183	GEMSTAT	0.778622	0.0480258
50	Papaloapan	Papaloapan	MX	18.17	-96.08	638.519	CARLOS A. CARRILLO	18.3638	-95.7318	2.45585	2.50504	GEMSTAT	0.852056	0.0479729
51	Shinano Gawa	Ojiya	JP	37.31	138.81	511.703	Shinano River - at Kyuzogoya	37.8667	139.033	1.68125	0.748729	GEMSTAT	0.876022	0.038445
52	Little Mecatina River	En Amont De La Riviere Netagamiou	CA	50.8686	-59.5992	495.48	RIVIERE JOIR APPROX.1KM.UPSTREAM OF	51.9812	-60.206	6.5	NA	GLORICH	0.72693	0.0372261
53	Connecticut River	Thompsonville, Ct	US	41.9873	-72.6054	490.091	Connecticut River - CT	41.9872	-72.6058	3.50614	2.24945	GEMSTAT	0.81956	0.0368213
54	Klamath River	Near Klamath, Ca	US	41.5143	-124	480.66	KLAMATH R NR KLAMATH CA	41.5146	-124.002	3.99375	3.76253	GLORICH	0.804473	0.0361127
55	Ishikari-Gawa	Ishikari-Ohashi	JP	43.1197	141.546	477.477	Ishikari River - at Ishikari	43.1211	141.546	2.85452	1.4138	GEMSTAT	0.839721	0.0358736
56	Skagit River	Near Mount Vernon, Wa	US	48.4448	-122.335	470.894	SKAGIT RIVER NEAR MOUNT VERNON, WASH.	48.4438	-122.333	2.14	0.833923	GLORICH	0.861828	0.035379
57	Coatzacoalcos	Las Perlas	MX	17.4381	-94.8667	449.273	COATZACOALCOS I BRIDGE	18.1174	-94.4166	2.82334	1.68311	GEMSTAT	0.840686	0.0337545
58	Nyong	Dehane	CM	3.57	10.12	442.593	Nyong at Mbalmayo	3.51041	11.502	15.3424	3.78632	GLORICH	0.453346	0.0332527
59	Kobuk River	Near Kiana, Alas.	US	66.973	-160.134	424.938	KOBUK R NR KIANA AK	66.9796	-160.143	7.1125	3.95995	GLORICH	0.707979	0.0319262
60	Trinity River	Liberty, Tx	US	30.0577	-94.8183	416.705	TRINITY RV AT ROMAYOR, TX	30.4271	-94.8479	6.35714	1.77022	GLORICH	0.73135	0.0313077
61	Colorado River	Lees Ferry, Ariz.	US	36.8647	-111.588	413.705	RIO COLORADO-YURIMURY	32.0387	-115.208	4.45601	6.93833	GEMSTAT	0.790171	0.0310823
62	Hudson River	Green Island, N.Y.	US	42.7523	-73.689	410.374	Hudson River - Poughkeepsie NY	41.7217	-73.9411	3.47689	0.653361	GEMSTAT	0.820465	0.030832
63	Rio Panuco	Las Adjuntas	MX	21.9833	-98.5667	391.373	RIO PANUCO IN FRONT OF LAGUNA DE CHILA	22.1843	-98.0155	3.91561	2.60525	GEMSTAT	0.806891	0.0294044
64	Penobscot River	Eddington, Me	US	44.8281	-68.6961	389.151	PENOBSCOT RIVER AT EDDINGTON, ME	44.8273	-68.6977	10.1125	1.46623	GLORICH	0.615159	0.0292375
65	Altamaha River	Doctortown, Ga.	US	31.6547	-81.8279	372.856	Altamaha River - GA	31.4269	-81.6056	7.53893	3.14385	GEMSTAT	0.694786	0.0280132
66	Riviere Richelieu	Rapides Fryers	CA	45.3983	-73.2589	360.607	RICHELIEU R (L CHAMPLAIN) AT ROUSES POINT NY	44.9976	-73.3474	6.46923	3.68474	GEMSTAT	0.727882	0.0270929
67	Dramselva	Mjondalen Bru	NO	59.7529	10.0073	356.051	DRAMMENSELVA VED MJØNDALSBRUA (GML.)	59.7534	10.009	3.3	0.633671	GEMSTAT	0.825938	0.0267506
68	Delaware River	Trenton, N.J.	US	40.2217	-74.7781	340.044	Delaware River - Chain Bridge	40.2217	-74.7783	2.75784	1.09677	GEMSTAT	0.842712	0.025548
69	Potomac River	Near Washington, D.C. (Adjusted)	US	38.9496	-77.1275	339.295	POTOMAC RIVER AT CHAIN BRIDGE, AT WASHINGTON, DC	38.9312	-77.1146	3.98695	2.80662	GLORICH	0.804684	0.0254917
70	Coppermine River	Above Bloody Falls	CA	67.74	-115.37	338.268	Coppermine River above Copper Creek	67.2289	-115.888	4.67059	1.85281	GEMSTAT	0.783532	0.0254146
71	Seine	Poses	FR	49.3	1.25	332.061	LA SEINE A POSES 2	49.3101	1.23665	3.54766	0.734157	GEMSTAT	0.818275	0.0249482
72	Weser	Intschede	DE	52.964	9.125	319.122	Brake	53.3363	8.49804	8.17467	3.85578	GLORICH	0.675116	0.0239761
73	Pascagoula River	Graham Ferry, Ms	US	30.6106	-88.6411	318.971	PASCAGOULA RIVER NR BENNDALE, MS	30.8772	-88.7729	8.00833	3.57833	GLORICH	0.680262	0.0239648
74	Savannah River	Near Clyo, Ga.	US	32.5282	-81.2687	317.585	SAVANNAH RIVER NEAR CLYO, GA	32.5271	-81.2646	7.03571	2.73147	GLORICH	0.710355	0.0238606
75	Colville River	Umiat, Ak	US	69.36	-152.12	288.469	COLVILLE R NR NUIQSUT AK	70.1686	-150.929	6.56667	2.35443	GLORICH	0.724867	0.0216731
76	Pearl River	Near Bogalusa, La.	US	30.7932	-89.8209	285.825	PEARL RIVER NEAR BOGALUSA, LA	30.7938	-89.8188	7.22308	2.94056	GLORICH	0.704558	0.0214745
77	Kennebec River	North Sidney, Me	US	44.4726	-69.6853	277.57	KENNEBEC RIVER AT NORTH SIDNEY, MAINE	44.4727	-69.6814	6.26392	0.690764	GLORICH	0.734234	0.0208542
78	Kiso-Gawa	Imawatari	JP	35.43	137.04	273.778	Kiso River - at Asahi	35.2794	136.719	0.9704	0.238862	GEMSTAT	0.898016	0.0205693
79	Snohomish River	Near Monroe, Wa	US	47.8309	-122.049	271.784	SNOHOMISH RIVER NEAR MONROE, WASH.	47.8316	-122.044	2.375	0.757343	GLORICH	0.854557	0.0204195
80	Pee Dee River	Peedee, S.C.	US	34.2043	-79.5484	270.226	PEE DEE RIVER AT PEEDEE, SC	34.2061	-79.5478	8.25	2.74247	GLORICH	0.672785	0.0203025
81	Bol'Shoy Anyuy	Konstantinovo	RU	68.15	161.167	259.777	Kolyma	68.7584	161.303	6.00781	2.13809	GLORICH	0.742158	0.0195174
82	Orange River	Vioolsdrif (27811003)	ZA	-28.7578	17.7214	243.994	Orange River - at Vioolsdrift (1)	-28.7608	17.7303	8.5973	6.80363	GEMSTAT	0.66204	0.0183316
83	Grijalva	Reforma	MX	17.9583	-93.1833	239.191	RIO GRIJALVA 18	18.2503	-92.6717	2.52754	1.42002	GEMSTAT	0.849838	0.0179708
84	Tone-Gawa	Fukawa (Tone North Branch)	JP	35.85	140.14	236.946	Tone River - at Tone-Ozeki	36.1806	139.475	1.42427	0.461979	GEMSTAT	0.883973	0.0178021
85	Yodo Gawa	Hirakata	JP	34.81	135.65	232.958	Yodo River - at Hirakata Bridge	34.8	135.633	2.04637	0.532216	GEMSTAT	0.864725	0.0175025
86	Roanoke River	Roanoke Rapids, N.C.	US	36.4605	-77.6345	230.88	ROANOKE RIVER AT ROANOKE RAPIDS, NC	36.4604	-77.6313	6.38824	2.39528	GLORICH	0.730388	0.0173464
87	Exploits River	Grand Falls	CA	48.9306	-55.6686	229.044	Exploits River at Transcanadian Highway (Sir Robert Bond Bridge)	49.0231	-55.4481	5.72805	1.28441	GEMSTAT	0.750814	0.0172084
88	Suwannee River	Near Bell, Fla	US	29.7913	-82.9243	227.862	SUWANNEE RIVER NEAR ROCK BLUFF SPRING (47)	29.7938	-82.9224	2.50001	NA	GLORICH	0.85069	0.0171196
89	Merrimack River	Below Concord River At Lowell, Ma	US	42.6459	-71.2984	225.453	MERRIMACK RIVER BL CONCORD RIVER AT LOWELL, MA	42.6479	-71.2979	4.87741	3.40863	GLORICH	0.777133	0.0169386
90	Rio Grande De Santiago	El Capomal	MX	21.825	-105.115	220.308	RIO GRANDE DE SANTIAGO 36 (VILLA JUAREZ)	21.6854	-105.396	4.34093	0.900975	GEMSTAT	0.793731	0.0165521
91	Brazos River	Richmond, Tex.	US	29.5825	-95.7577	216.679	BRAZOS RIVER NR ROSHARON, TX	29.3479	-95.5813	7.22727	2.28652	GLORICH	0.704428	0.0162794
92	Umpqua River	Near Elkton, Or	US	43.586	-123.555	206.919	UMPQUA RIVER NEAR ELKTON, OREG.	43.5896	-123.556	2.43571	0.963653	GLORICH	0.852679	0.0155461
93	San Juan	San Juan Evangelista	MX	17.88	-95.13	200.021	THE CEIBILLA	18.2299	-95.4447	2.98168	2.06292	GEMSTAT	0.835787	0.0150279
94	Choctawhatchee River	Near Bruce, Fla	US	30.451	-85.8983	196.298	CHOCTAWHATCHEE RIVER NR BRUCE, FLA.	30.4521	-85.8979	6.26667	2.73774	GLORICH	0.734149	0.0147482
95	Murray River	Below Wakool Junction	AU	-34.8472	143.342	192.099	MURRAY RIVER @ BELOW WAKOOL JUNCTION	-34.8479	143.344	3	NA	GEMSTAT	0.83522	0.0144327
96	Riviere Saint-Francois	A La Centrale De Hemming Falls	CA	45.8617	-72.4531	191.789	Saint-François River at Pierreville (03020031)	46.0664	-72.8122	7.3403	1.13122	GEMSTAT	0.700931	0.0144094
97	Escambia River	Near Molino, Fla	US	30.6682	-87.2666	181.461	ESCAMBIA RIVER NEAR CENTURY, FL	30.9646	-87.2354	6.00714	1.89958	GLORICH	0.742179	0.0136334
98	Androscoggin River	Near Auburn, Me.	US	44.0723	-70.2081	179.923	ANDROSCOGGIN RIVER AT BRUNSWICK, ME	43.9185	-69.9744	8.66667	1.17189	GLORICH	0.659893	0.0135179
99	Neches River	Evadale, Tex.	US	30.3558	-94.0932	178.266	NECHES RIVER AT EVADALE, TEX.	30.3567	-94.0942	7.28667	2.0622	GLORICH	0.702591	0.0133934
100	Sabine River	Near Ruliff, Tex.	US	30.3038	-93.7438	175.51	SABINE RIVER NR RULIFF, TX	30.3063	-93.74	8.03846	4.0155	GLORICH	0.67933	0.0131863
101	Kenai River	Soldotna, Ak	US	60.4769	-151.082	172.833	KENAI R AT SOLDOTNA AK	60.4865	-151.083	0.863216	0.46206	GLORICH	0.901332	0.0129852
102	Rio Verde	Paso De La Reyna	MX	16.275	-97.5917	167.237	RIO VERDE 2	16.2163	-97.6937	2.3149	1.41071	GEMSTAT	0.856417	0.0125648
103	Rogue River	Near Agness, Oreg.	US	42.5804	-124.059	161.116	ROGUE RIVER NEAR AGNESS,OREG.	42.5813	-124.06	2.60714	0.800446	GLORICH	0.847375	0.0121049
104	Tana	Garissa	KE	-0.45	39.7	155.755	Tana River	-2.28521	40.1315	0.735962	NA	GLORICH	0.905269	0.0117021
105	Cape Fear River	Lock #1 Near Kelly, Nc	US	34.4043	-78.2936	152.936	CAPE FEAR R AT LOCK # 1 NR KELLY, NC	34.4063	-78.2938	11.5933	5.99356	GLORICH	0.569342	0.0114903
106	Vefsna	Lakfors	NO	65.6215	13.2907	148.393	VEFSNA (VAAPSTENJEANOE)	65.7496	13.2375	1.65909	0.546268	GEMSTAT	0.876708	0.011149
107	Otra	Heisel	NO	58.2476	7.95143	148.344	OTRA VED SKRÅSTAD	58.1867	7.95295	2.575	1.00736	GEMSTAT	0.848369	0.0111453
108	Papagayo	La Parota	MX	16.9292	-99.6083	134.607	RIO PAPAGAYO 12	16.71	-99.6051	2.24865	2.41743	GEMSTAT	0.858467	0.0101132
109	Saint Croix River	St. Croix Falls, Wi	US	45.4069	-92.6472	127.592	St. Croix River	45.1697	-67.2972	7.87541	2.38044	GEMSTAT	0.684375	0.00958618
110	San Joaquin River	Near Vernalis, Ca	US	37.676	-121.266	125.488	SAN JOAQUIN R NR VERNALIS CA	37.676	-121.266	4.70508	6.65458	GEMSTAT	0.782465	0.0094281
111	Queets River	Near Clearwater, Wa	US	47.5379	-124.316	124.502	QUEETS RIVER NEAR CLEARWATER, WASH.	47.5393	-124.315	2.05	1.40096	GLORICH	0.864613	0.00935402
112	Gander River	Big Chute	CA	49.0153	-54.8536	121.279	Gander River below Gander Lake at Appleton	48.9944	-54.8675	7.10941	0.485412	GEMSTAT	0.708075	0.00911187
113	Southwest Miramichi River	Blackville	CA	46.7358	-65.8256	120.259	SOUTHWEST MIRAMICHI RIVER AT BRIDGE, BLACKVILLE	46.7356	-65.8224	4.86795	2.57599	GLORICH	0.777426	0.00903524
114	Neuse River	Near Fort Barnwell, Nc	US	35.3127	-77.3052	118.825	NEUSE RIVER AT SR1470 NR FT BARNWELL, NC	35.3143	-77.3022	7.4	NA	GLORICH	0.699084	0.0089275
115	Chehalis River	Porter, Wash.	US	46.9379	-123.314	114.42	CHEHALIS RIVER AT PORTER, WASH.	46.9398	-123.315	2.91429	1.05017	GLORICH	0.837872	0.00859654
116	Rio Bravo	Laredo, Tex.	US	27.5	-99.5	113.528	RIO GRANDE NR BROWNSVILLE, TX	25.8729	-97.4604	5.91538	3.01326	GLORICH	0.745018	0.00852953
117	Nooksack River	Ferndale, Wa	US	48.8448	-122.589	110.274	NOOKSACK RIVER AT BRENNAN, WA	48.8199	-122.577	2.49	1.41418	GLORICH	0.850999	0.00828505
118	Smith River	Near Crescent City, Ca	US	41.7915	-124.076	105.24	SMITH R NR CRESCENT CITY CA	41.7896	-124.077	1.75333	1.3721	GLORICH	0.873792	0.00790684
119	Puyallup River	Puyallup, Wa	US	47.2084	-122.327	94.405	PUYALLUP RIVER AT PUYALLUP, WASH.	47.2146	-122.34	3.02381	2.00123	GLORICH	0.834483	0.00709279
120	Naskaupi River	Below Naskaupi Lake	CA	54.1317	-61.4292	90.205	Naskaupi River below Naskaupi Lake	54.1317	-61.4292	3.29804	1.02946	GEMSTAT	0.825999	0.00677724
121	Santa Catarina	Las Juntas	MX	16.7042	-98.2667	89.912	RIO SANTA CATARINA 3	16.5769	-98.4564	1.2193	1.27807	GEMSTAT	0.890315	0.00675522
122	Rio San Pedro	San Pedro	MX	21.9667	-105.15	88.009	RIO SAN PEDRO 13	21.8548	-105.481	2.33263	2.28721	GEMSTAT	0.855868	0.00661225
123	Suchiate	Suchiate Ii	MX	14.6833	-92.1333	82.449	SUCHIATE RIVER	14.5545	-92.217	1.44927	1.23118	GEMSTAT	0.8832	0.00619452
124	Schuylkill River	Philadelphia, Pa	US	39.9679	-75.1885	81.625	SCHUYLKILL RIVER AT PHILADELPHIA, PA	39.9688	-75.1854	4.14055	3.6925	GLORICH	0.799931	0.00613261
125	Ems River	Versen Wehrdurchstich Gesamt	DE	52.74	7.24	79.583	Ems at Terborg	53.2943	7.394	12.2861	5.11547	GLORICH	0.547908	0.00597919
126	Yaqui	El Novillo I	MX	28.93	-109.63	78.662	RIO YAQUI 2	27.6387	-110.376	6.19961	2.24648	GEMSTAT	0.736224	0.00590999
127	Alttaeatnu	Kista	NO	69.8263	23.5168	77.972	ALTAELVA	69.901	23.2843	2.45833	0.24293	GEMSTAT	0.851979	0.00585815
128	Housatonic River	Stevenson, Conn.	US	41.384	-73.1676	76.701	HOUSATONIC R AT STEVENSON, CT	41.3854	-73.1685	7.62353	8.8306	GLORICH	0.692168	0.00576266
129	Calcasieu River	Near Kinder, La	US	30.5026	-92.9154	71.389	CALCASIEU RIVER NR LAKE CHARLES, LA	30.2938	-93.1896	11.3	5.23259	GLORICH	0.578418	0.00536356
130	Edisto River	Near Givhans, Sc	US	33.0279	-80.3915	68.782	Edisto River - SC	33.0278	-80.3917	10.0103	4.74759	GEMSTAT	0.61832	0.00516769
131	Restigouche River	Below Kedgwick River	CA	47.6669	-67.4831	68.726	RESTIGOUCHE RIVER AT RAFTING GROUND BROOK	47.9063	-66.948	1.54786	1.10743	GLORICH	0.880149	0.00516349
132	Tar River	Tarboro, N.C.	US	35.8944	-77.5331	62.306	CHICOD CR AT SR1760 NEAR SIMPSON, NC	35.5646	-77.2313	10.873	1.99425	GLORICH	0.59163	0.00468114
133	Ogeechee River	Near Eden, Ga.	US	32.1916	-81.4159	62.014	OGEECHEE RIVER NEAR EDEN, GA.	32.1906	-81.4148	9.41764	5.72988	GLORICH	0.636658	0.0046592
134	Russian River	Near Guerneville, Ca	US	38.5085	-122.928	61.899	RUSSIAN R NR GUERNEVILLE CA	38.5059	-122.927	4.43333	3.39972	GLORICH	0.790873	0.00465056
135	Satilla River	Atkinson, Ga.	US	31.2213	-81.8673	60.742	SATILLA RIVER AT ATKINSON, GA.	31.2215	-81.8732	22.225	22.1015	GLORICH	0.240398	0.00456364
136	Amite River	Near Denham Springs, La	US	30.4641	-90.9904	59.027	AMITE RIVER AT PORT VINCENT, LA	30.3351	-90.8519	2.19999	NA	GLORICH	0.859972	0.00443479
137	River Moy	Rahans	IE	54.1039	-9.15768	56.501	ARDNAREE BRIDGE	54.1124	-9.15273	10.8914	5.13865	GEMSTAT	0.591061	0.004245
138	Bogue Chitto	Near Bush, La.	US	30.6294	-89.8973	56.454	BOGUE FALAYA @ COVINGTON, LA	30.4981	-90.0851	4.6	3.747	GLORICH	0.785716	0.00424147
139	La Antigua	Cardel	MX	19.3617	-96.36	56.453	SALMORAL BRIDGE	19.3479	-96.3587	1.77905	1.28533	GEMSTAT	0.872996	0.0042414
140	Rio Bobos	Martinez De La Torre	MX	20.0617	-97.0283	54.546	NAUTLA BRIDGE	20.2113	-96.7797	3.24472	3.84548	GEMSTAT	0.827648	0.00409812
141	Ochlockonee River	Near Smith Creek, Fla	US	30.1766	-84.668	53.92	OCHLOCKONEE RIVER NR HAVANA, FLA.	30.5563	-84.3813	12.1463	3.38117	GLORICH	0.552234	0.00405109
142	Rio Baluarte	Baluarte Ii	MX	22.9833	-105.825	53.587	BALUARTE (EL ROSARIO BRIDGE)	22.9977	-105.847	2.16983	1.64116	GEMSTAT	0.860905	0.00402607
143	Alexis River	Near Port Hope Simpson	CA	52.6492	-56.8714	52.944	ALEXIS RIVER APPROX. 48 KM FROM PORT HOPE SIMPSON	52.6489	-56.8714	11.1067	4.06755	GLORICH	0.5844	0.00397776
144	Piaxla	Ixpalino	MX	23.9556	-106.571	52.46	RIO PIAXTLA 1	23.7256	-106.788	2.27944	1.50024	GEMSTAT	0.857514	0.0039414
145	San Lorenzo	Santa Cruz	MX	24.4847	-106.947	51.462	SAN LORENZO RIVER 4	24.2682	-107.401	2.59822	6.04449	GEMSTAT	0.847651	0.00386642
146	Bjerkreimselva	Bjerkreim Bru	NO	58.58	6.08	51.348	BJERKREIMSELVA VED TENGS	58.4797	5.99554	1.11	NA	GEMSTAT	0.893697	0.00385785
147	Pantepec	Alamo	MX	20.9317	-97.66	51.108	TUXPAN CHANNEL	19.3936	-100.425	3.95543	2.56681	GEMSTAT	0.805659	0.00383982
148	Coahuayana	Callejones	MX	18.8	-103.608	48.455	RIO COAHUAYANA 1	18.6945	-103.738	2.56139	1.9887	GEMSTAT	0.848791	0.0036405
149	Rappahannock River	Near Fredericksburg, Va	US	38.3085	-77.5292	48.343	RAPPAHANNOCK RIVER NEAR FREDERICKSBURG, VA	38.3229	-77.5188	12.4867	20.2266	GLORICH	0.541703	0.00363208
150	Rio Ameca	Las Gaviotas Ii	MX	20.9083	-105.108	46.613	MOUTH OF THE AMECA RIVER TO PLAYA NUEVO VALLARTA	20.6775	-105.285	2.07374	2.07874	GEMSTAT	0.863879	0.0035021
151	Rio De La Plata	Vega El Salado	CO	2.38	-75.92	46.123	RIO DE LA PLATA AT HWY 2 NR TOA ALTA, P.R.	18.4105	-66.2602	6.40476	3.37201	GLORICH	0.729877	0.00346529
152	Cazones	Poza Rica	MX	20.5467	-97.4583	45.733	DRAWERS	20.71	-97.3001	4.39795	4.0348	GEMSTAT	0.791967	0.00343599
153	Kuparuk River	Near Deadhorse, Ak	US	70.2814	-148.963	43.111	KUPARUK R NR DEADHORSE AK	70.2777	-148.963	9.3125	3.98118	GLORICH	0.639911	0.00323899
154	Rio Sinaloa	Jaina	MX	25.9	-107.986	43.081	RH10-1 SINALOA	25.3255	-108.457	1.95669	1.95197	GEMSTAT	0.8675	0.00323674
155	Saint Marys River	Stillwater	CA	45.1733	-61.9817	43.007	ST. MARY'S RIVER AT HWY 7 BRIDGE,STILLWATER	45.1734	-61.9809	4.14851	1.63421	GLORICH	0.799685	0.00323118
156	Var	Mescla	FR	43.75	6.9	42.987	Var à Saint Laurent du Var, Pont autoroute rive g*	43.6686	7.19796	1.00905	0.766392	GLORICH	0.89682	0.00322968
157	Elwha River	Mcdonald Bridge Near Port Angeles, Wa	US	48.0548	-123.583	42.758	ELWHA RIVER AT MCDONALD BR NR PRT ANGELES, WASH.	48.0563	-123.585	2.02353	1.39621	GLORICH	0.865432	0.00321247
158	Aude	Carcassonne (Pont Neuf)	FR	43.2133	2.36013	42.551	Aude à Moussan, Aval viaduc SNCF	43.2476	2.96115	2.4574	0.849731	GLORICH	0.852008	0.00319692
159	Acaponeta	Acaponeta	MX	22.4833	-105.325	42.448	RIO ACAPONETA 1	22.2719	-105.525	3.3442	3.03348	GEMSTAT	0.82457	0.00318918
160	Rio Fuerte Nuevo	San Miguel Zapotitlan	MX	25.9542	-109.046	41.967	RIO FUERTE 1	25.9314	-109.138	2.44994	1.51457	GEMSTAT	0.852239	0.00315304
161	Rio Humaya	Palos Blancos	MX	24.925	-107.382	41.903	CULIACAN LA PIPIMA RIVER	24.6918	-107.7	2.82855	1.45542	GEMSTAT	0.840525	0.00314823
162	River Barrow	Graiguenamanagh U/S	IE	52.5408	-6.95088	41.721	BROWNSBARN BR	52.5006	-7.09146	7.54333	3.69986	GEMSTAT	0.694649	0.00313456
163	Bay Du Nord River	Big Falls	CA	47.7467	-55.4417	39.97	BAY DU NORD RIVER, DOWNSTREAM OF WSC GAUGE STATION	47.7458	-55.4397	5.13806	1.01825	GLORICH	0.769069	0.00300301
164	Guadalupe River	Victoria, Tx	US	28.793	-97.013	39.608	GUADALUPE RIVER AT VICTORIA, TX	28.7939	-97.0148	5.575	2.98515	GLORICH	0.75555	0.00297581
165	Nottoway River	Near Sebrell, Va	US	36.7704	-77.1661	38.069	NOTTOWAY RIVER NEAR SEBRELL, VA	36.7688	-77.1646	7.42177	2.88936	GLORICH	0.69841	0.00286018
166	Opper Schelde	Bossuit	BE	50.7412	3.39198	36.426	Scheldt River - at Hemiksem	51.1431	4.33057	7.62083	1.47382	GEMSTAT	0.692251	0.00273674
167	Firth River	Near The Mouth	CA	69.3136	-139.567	36.381	Firth River near the mouth	69.3264	-139.567	3.99318	2.81172	GEMSTAT	0.804491	0.00273336
168	Appomattox River	Matoaca, Va	US	37.2252	-77.4753	35.885	APPOMATTOX RIVER AT MATOACA, VA	37.2266	-77.4754	14.0375	23.2245	GLORICH	0.49372	0.00269609
169	La Have River	West Northfield	CA	44.4467	-64.5917	34.987	LAHAVE RIVER @ WEST NORTHFIELD BRIDGE (WSC GAUGE)	44.4481	-64.5933	6.56934	1.77547	GLORICH	0.724785	0.00262863
170	Orb	Beziers-Tabarka	FR	43.4	3.2	34.035	Orb à Villeneuve les Béziers, Aval immédiat pont *	43.3103	3.25208	2.00809	1.07261	GLORICH	0.86591	0.0025571
171	Little Southwest Miramichi River	Lyttleton	CA	46.9358	-65.9072	33.56	LITTLE SOUTHWEST MIRAMICHI AT BRIDGE, LYTTLETON	46.9359	-65.9119	4.87143	2.58529	GLORICH	0.777318	0.00252141
172	Yellow River	Milligan, Fla.	US	30.753	-86.6291	32.631	YELLOW RIVER AT MILLIGAN, FLA.	30.7521	-86.6271	5.15	3.01285	GLORICH	0.768699	0.00245162
173	Rio Tehuantepec	Las Cuevas Ii	MX	16.425	-95.3292	32.466	RIO TEHUANTEPEC 4	16.1881	-95.1461	2.46113	2.24966	GEMSTAT	0.851893	0.00243922
174	Vecht	Vechterweerd	NL	52.52	6.21	32.323	Vechte at Laar	52.6072	6.73595	10.4096	2.2985	GLORICH	0.605967	0.00242847
175	Saint Regis River	Brasher Center, N.Y.	US	44.8637	-74.7788	30.279	ST. REGIS RIVER AT BRASHER CENTER NY	44.8646	-74.7771	13.6	10.5642	GLORICH	0.507256	0.00227491
176	Peace River	Arcadia, Fla.	US	27.2223	-81.8759	29.887	PEACE RIVER AT ARCADIA, FLA.	27.2188	-81.8813	16.5739	9.78627	GLORICH	0.415245	0.00224545
177	Saco River	Near Conway, N.H.	US	43.9909	-71.0909	27.64	SACO RIVER AT CORNISH, ME	43.8061	-70.7814	23.4727	30.2125	GLORICH	0.201794	0.00207663
178	Withlacoochee River	Near Holder, Fla.	US	28.9889	-82.3495	26.49	WITHLACOOCHEE RIVER NR HOLDER, FLA.	28.9896	-82.3492	12.32	11.574	GLORICH	0.546859	0.00199023
179	Pipers Hole River	Mothers Brook	CA	47.9469	-54.2856	25.255	PIPERS HOLE RIVER AT MOTHERS BROOK	47.9269	-54.2733	5.06302	1.57984	GLORICH	0.77139	0.00189745
180	Torrent River	Bristol'S Pool	CA	50.6075	-57.1511	24.863	TORRENT RIVER AT BRISTOL'S POOL POINT	50.6063	-57.1518	5.136	1.384	GLORICH	0.769132	0.00186799
181	Bayou Nezpique	Near Basile, La.	US	30.4808	-92.6318	23.068	BAYOU NEZPIQUE NEAR PANCHOVILLE, LA	30.3598	-92.6271	12.963	4.40937	GLORICH	0.526965	0.00173313
182	Nordhura	Stekkur	IS	64.7107	-21.6034	22.391	NORÐURÁ VIÐ STEKK	64.7109	-21.603	0.89359	0.38975	GEMSTAT	0.900392	0.00168227
183	River Feale	Listowel	IE	52.4427	-9.47569	20.912	FORD U/S FEALE R CONFL (LHS)	52.434	-9.4336	15.0293	5.81335	GEMSTAT	0.463033	0.00157115
184	Shetucket River	Near Willimantic, Conn.	US	41.7004	-72.182	20.698	SHETUCKET R AT SOUTH WINDHAM, CT	41.6813	-72.1646	4.25	1.6243	GLORICH	0.796545	0.00155507
185	River Slaney	Scarrawalsh	IE	52.5485	-6.55022	19.993	SLANEY BR BUNCLODY	52.6561	-6.6494	6.54833	2.71502	GEMSTAT	0.725435	0.0015021
186	San Antonio River	Goliard, Tx	US	28.6497	-97.3847	18.988	SAN ANTONIO RIVER AT GOLIAD, TX	28.6521	-97.3854	6.35385	2.51317	GLORICH	0.731452	0.0014266
187	Nueces River	Near Three Rivers, Tx	US	28.4275	-98.1781	18.131	NUECES RIVER NR THREE RIVERS, TX	28.4313	-98.1769	9.81538	7.5911	GLORICH	0.624352	0.00136221
188	Pawcatuck River	Westerly, R.I.	US	41.3837	-71.8331	16.563	PAWCATUCK RIVER AT WESTERLY, RI	41.3827	-71.8354	9.44	7.68838	GLORICH	0.635966	0.0012444
189	Roseway River	Lower Ohio	CA	43.8383	-65.37	16.526	ROSEWAY RIVER (WSC GAUGE), LOWER OHIO	43.8351	-65.3689	13.2077	4.50405	GLORICH	0.519394	0.00124162
190	Purificacion	El Barretal Ii	MX	24.1125	-99.1325	15.421	ROAD BRIDGE (SLM)	23.7372	-98.2063	3.37032	1.67529	GEMSTAT	0.823762	0.0011586
191	Demer	Aarschot	BE	50.9877	4.82232	15.137	Scheldt River - at Hemiksem	51.1431	4.33057	7.62083	1.47382	GEMSTAT	0.692251	0.00113727
192	Orkla	Naeverdal	NO	63.29	9.73	14.005	ORKLA VED VORMSTAD	63.2006	9.77194	2.73333	1.08404	GEMSTAT	0.843471	0.00105222
193	Rio Grande De Manati	Highway 2 Near Manati	PR	18.4291	-66.5266	12.88	RIO GRANDE DE MANATI AT HWY 2 NR MANATI, P.R.	18.4351	-66.5269	6.73158	4.29768	GLORICH	0.719765	0.000967693
194	Oromocto River	Tracy	CA	45.6736	-66.6828	12.635	OROMOCTO RIVER AT HWY 7 BRIDGE, OROMOCTO	45.8481	-66.5178	9.55	6.29325	GLORICH	0.632563	0.000949286
195	Margaree River	Near Upper Margaree	CA	46.2233	-61.1367	12.551	Northeast Margaree River	46.3656	-60.975	2.21695	1.22839	GEMSTAT	0.859448	0.000942975
196	Rocky River	Near Colinet	CA	47.2247	-53.5683	11.236	ROCKY RIVER ABOVE FALLS ABOVE HWY 6 BRIDGE	47.2267	-53.5692	8.10976	3.72992	GLORICH	0.677124	0.000844177
197	Gold River	Mosher'S Falls	CA	44.5644	-64.3517	11.074	GOLD RIVER @ BRIDGE 300 M EAST OF HWY 12, NEW ROSS	44.7358	-64.4522	7	1.27279	GLORICH	0.71146	0.000832006
198	Salinas River	Near Spreckels, Ca	US	36.6311	-121.672	10.743	SALINAS R NR CHUALAR CA	36.5563	-121.548	4.58182	1.58734	GLORICH	0.786279	0.000807137
199	Rio Grande De Anasco	Near San Sebastian	PR	18.2827	-67.051	10.326	RIO GRANDE DE ANASCO NR SAN SEBASTIAN, P.R.	18.2814	-67.052	3.75556	2.09964	GLORICH	0.811843	0.000775808
200	Alafia River	Lithia, Fla.	US	27.8722	-82.2112	9.398	ALAFIA RIVER AT LITHIA, FLA.	27.8731	-82.2141	13.8	6.1636	GLORICH	0.501068	0.000706086
201	Garnish River	Near Garnish	CA	47.2139	-55.3292	9.045	GARNISH RIVER NEAR GARNISH	47.2184	-55.3312	6.72154	2.38207	GLORICH	0.720076	0.000679564
202	Lamprey River	Near Newmarket, N.H.	US	43.1026	-70.9526	8.214	LAMPREY R BLW COTTON RD, NR DEERFIELD CENTER, NH	43.0816	-71.2312	4.6	NA	GLORICH	0.785716	0.00061713
203	Lavaca River	Near Edna, Tx	US	28.96	-96.6864	7.529	LAVACA RIVER NR EDNA, TX	28.9604	-96.6896	7.39167	4.43159	GLORICH	0.699342	0.000565665
204	Esteron	Broc (La Clave)	FR	43.8454	7.15582	6.973	Esteron à Gilette	43.8274	7.18182	1.15	0.151879	GLORICH	0.892459	0.000523892
205	Santa Clara River	Montalvo, Ca	US	34.2422	-119.19	4.505	SANTA CLARA R A LOS ANGELES-VENTURA CO LINE CA	34.4023	-118.702	6.38889	3.41484	GLORICH	0.730368	0.000338467
206	Choptank River	Near Greensboro, Md.	US	38.9972	-75.7858	4.042	CHOPTANK R NR GREENSBORO, MD	38.9974	-75.7854	6.97778	3.15773	GLORICH	0.712148	0.000303681
207	Saddle River	Lodi, N.J.	US	40.8903	-74.0806	2.917	SADDLE RIVER AT LODI NJ	40.8903	-74.0806	3.4	NA	GLORICH	0.822844	0.000219159
208	Rio Grande De Patillas	Lago Patillas	PR	18.0189	-66.0216	2.227	RIO GRANDE DE PATILLAS NR PATILLAS, P.R.	18.0354	-66.0351	3.20556	1.541	GLORICH	0.82886	0.000167318
209	Aille	Vidauban (Le Baou)	FR	43.3941	6.45291	2.195	Aille à Vidauban, Lieu dit Le Clos d'Aille	43.4071	6.47275	3.7	1.43295	GLORICH	0.813562	0.000164914
210	Real Martin	La Crau (Decapris)	FR	43.1856	6.11118	2.18	Réal Martin à Pierrefeu du Var	43.2311	6.14381	1.51	0.688715	GLORICH	0.881321	0.000163787
211	San Luis Rey River	Oceanside, Ca	US	33.2181	-117.36	0.964	SAN LUIS REY R A OCEANSIDE CA	33.2186	-117.361	8.19167	2.92309	GLORICH	0.67459	7.24267e-05
												Discharge-weighted mean	0.74372

## Sheet: Reference list
Reference list for Supplementary Data
Riverine dissolved neodymium concentration and pH data
1) Amazon1, 2, 3, 4, 5	1	Goldstein SJ, Jacobsen SB. Rare earth elements in river waters. Earth Planet Sci Lett 89, 35-47 (1988).
2) Avon6	2	Elderfield H, Upstill-Goddard R, Sholkovitz E. The rare earth elements in rivers, estuaries, and coastal seas and their significance to the composition of ocean waters. Geochim Cosmochim Acta 54, 971-991 (1990).
3) Bear6	3	Sholkovitz ER. The geochemistry of rare earth elements in the Amazon River estuary. Geochim Cosmochim Acta 57, 2181-2190 (1993).
4) Bruneau6	4	Rousseau TC, et al. Rapid neodymium release to marine waters from lithogenic sediments in the Amazon estuary. Nat Commun 6, 7592 (2015).
5) Changjiang7, 8	5	Merschel G, Bau M, Schmidt K, Münker C, Dantas EL. Hafnium and neodymium isotopes and REY distribution in the truly dissolved, nanoparticulate/colloidal and suspended loads of rivers in the Amazon Basin, Brazil. Geochim Cosmochim Acta 213, 383-399 (2017).
6) Chao Phraya9, 10	6	Goldstein SJ, Jacobsen SB. The Nd and Sr isotopic systematics of river-water dissolved material: Implications for the sources of Nd and Sr in seawater. Chemical Geology: Isotope Geoscience section 66, 245-272 (1987).
7) Colorado6	7	Che H, Zhang J, Liu Q, He H, Zhao Z-Q. Refining the contribution of riverine particulate release to the global marine Nd budget. Progress in Earth and Planetary Science 9, (2022).
8) Columbia6, 11	8	Zhai W, Dai M, Guo X. Carbonate system and CO2 degassing fluxes in the inner estuary of Changjiang (Yangtze) River, China. Marine Chemistry 107, 342-356 (2007).
9) Congo12, 13	9	Nozaki Y, Lerche D, Alibo DS, Snidvongs A. The estuarine geochemistry of rare earth elements and indium in the Chao Phraya River, Thailand. Geochim Cosmochim Acta 64, 3983-3994 (2000).
10) Connecticut2, 14	10	Kulthanan K, Nuchkull P, Varothai S. The pH of water from various sources: an overview for recommendation for patients with atopic dermatitis. Asia Pac Allergy 3, 155-160 (2013).
11) Delaware2, 15	11	Keasler K, Loveland W. Rare earth elemental concentrations in some Pacific Northwest rivers. Earth Planet Sci Lett 61, 68-72 (1982).
12) Elimbah Creek16	12	Rahlf P, Laukert G, Hathorne EC, Vieira LH, Frank M. Dissolved neodymium and hafnium isotopes and rare earth elements in the Congo River Plume: Tracing and quantifying continental inputs into the southeast Atlantic. Geochim Cosmochim Acta 294, 192-214 (2021).
13) Fly17, 18	13	Wang ZA, et al. Inorganic carbon speciation and fluxes in the Congo River. Geophys Res Lett 40, 511-516 (2013).
14) Fraser River, Can.11, 19	14	Sun Z, Wang X, Planavsky N. Cr isotope systematics in the Connecticut River estuary. Chem Geol 506, 29-39 (2019).
15) Garonne River, Fr.20, 21	15	Shi B, Allen HE, Grassi MT. Changes in dissolved and particulate copper following mixing of POTW effluents with Delaware River water. Water Research 32, 2413-2421 (1998).
16) Gironde22, 23	16	Lawrence MG, Kamber BS. The behaviour of the rare earth elements during estuarine mixing—revisited. Marine Chemistry 100, 147-161 (2006).
17) Great Whale6	17	Sholkovitz E, Szymczak R. The estuarine chemistry of rare earth elements: comparison of the Amazon, Fly, Sepik and the Gulf of Papua systems. Earth Planet Sci Lett 179, 299-309 (2000).
18) Hudson River6, 24, 25	18	Ferguson PR, Dubois KD, Veizer J. Fluvial carbon fluxes under extreme rainfall conditions: Inferences from the Fly River, Papua New Guinea. Chem Geol 281, 283-292 (2011).
19) Indin River, Can.20	19	Cameron EM, Hall GE, Veizer J, Krouse HR. Isotopic and elemental hydrogeochemistry of a major river system: Fraser River, British Columbia, Canada. Chem Geol 122, 149-169 (1995).
20) Indus6, 26	20	Gaillardet J, Viers J, Dupré B. Trace elements in river waters. Treatise on geochemistry 5, 605 (2003).
21) Kolyma27, 28	21	Etchanchu D, Probst J-L. Evolution of the chemical composition of the Garonne River water during the period 1971–1984. Hydrological sciences journal 33, 243-256 (1988).
22) Lena29, 30	22	Martin JM, Høgdahl O, Philippot JC. Rare earth element supply to the Ocean. Journal of Geophysical Research 81, 3119-3124 (1976).
23) Mackenzie20, 31	23	Masson M, Schafer J, Blanc G, Pierre A. Seasonal variations and annual fluxes of arsenic in the Garonne, Dordogne and Isle Rivers, France. Sci Total Environ 373, 196-207 (2007).
24) Manning6	24	Sholkovitz ER. The aquatic chemistry of rare earth elements in rivers and estuaries. Aquatic Geochemistry 1, 1-34 (1995).
25) Mississippi6, 24	25	Wall GR, Nystrom EA, Litten S. Suspended Sediment Transport in the Freshwater Reach of the Hudson River Estuary in Eastern New York. Estuaries and Coasts 31, 542-553 (2008).
26) Missouri6	26	Rahman A, Chughtai M. Reginol interpretation of river Indus water quality data using regression model. African Journal of Environmental Science and Technology 8, 86-90 (2014).
27) Mistassini, Can.20	27	Porcelli D, Andersson PS, Baskaran M, Frank M, Björk G, Semiletov I. The distribution of neodymium isotopes in Arctic Ocean basins. Geochim Cosmochim Acta 73, 2645-2659 (2009).
28) Murchison6	28	Denfeld BA, Frey KE, Sobczak WV, Mann PJ, Holmes RM. Summer CO2 evasion from streams and rivers in the Kolyma River basin, north-east Siberia. Polar Research 32, (2013).
29) Murray6	29	Laukert G, et al. Ocean circulation and freshwater pathways in the Arctic Mediterranean based on a combined Nd isotope, REE and oxygen isotope section across Fram Strait. Geochim Cosmochim Acta 202, 285-309 (2017).
30) Niger32	30	Hölemann JA, Schirmacher M, Prange A. Seasonal variability of trace metals in the Lena River and the southeastern Laptev Sea: Impact of the spring freshet. Global and Planetary Change 48, 112-125 (2005).
31) Nyong33	31	Zimmermann B, et al. Hafnium isotopes in Arctic Ocean water. Geochim Cosmochim Acta 73, 3218-3233 (2009).
32) Ob31, 34	32	Picouet C, Dupré B, Orange D, Valladon M. Major and trace element geochemistry in the upper Niger river (Mali): physical and chemical weathering rates and CO2 consumption. Chem Geol 185, 93-124 (2002).
33) Ohio6	33	Viers J, et al. Major and trace element abundances, and strontium isotopes in the Nyong basin rivers (Cameroon): constraints on chemical weathering processes and elements transport mechanisms in humid tropical environments. Chem Geol 169, 211-241 (2000).
34) Orinoco35	34	Makkaveev P, et al. Flux of nutrients from Ob’and Yenisey rivers to the Arctic Ocean: Results from June 2000 expedition. Proceedings of the Arctic Regional Centre 3, 97-106 (2001).
35) Ottawa6	35	Mora A, Moreau C, Moquet J-S, Gallay M, Mahlknecht J, Laraque A. Hydrological control, fractionation, and fluxes of dissolved rare earth elements in the lower Orinoco River, Venezuela. Applied Geochemistry 112, 104462 (2020).
36) Parana36	36	Campodonico VA, García MG, Pasquini AI. The dissolved chemical and isotopic signature downflow the confluence of two large rivers: The case of the Parana and Paraguay rivers. Journal of Hydrology 528, 161-176 (2015).
37) Peel, Can.20	37	Viers J, Dupré B, Polvé M, Schott J, Dandurand J-L, Braun J-J. Chemical weathering in the drainage basin of a tropical watershed (Nsimi-Zoetele site, Cameroon): comparison between organic-poor and organic-rich waters. Chem Geol 140, 181-206 (1997).
38) Rivers in West Greenland6	38	Deberdt S, Viers J, Dupré B. New insights about the rare earth elements (REE) mobility in river waters. Bulletin de la Société Géologique de France 173, 147-160 (2002).
39) Sanaga37, 38	39	Marescaux A, Thieu V, Borges AV, Garnier J. Seasonal and spatial variability of the partial pressure of carbon dioxide in the human-impacted Seine River in France. Sci Rep 8, 13961 (2018).
40) Seine at Paris, Fr.20, 39	40	Pokrovsky O, Schott J. Iron colloids/organic matter associated transport of major and trace elements in small boreal rivers and their estuaries (NW Russia). Chem Geol 190, 141-179 (2002).
41) Sepik4, 17	41	Dai A, Trenberth KE. Estimates of freshwater discharge from continents: Latitudinal and seasonal variations. Journal of hydrometeorology 3, 660-687 (2002).
42) Shinano, Jpn.6	42	Hartmann J, Lauerwald R, Moosdorf N. GLORICH - Global river chemistry database. PANGAEA, https://doi.org/10.1594/PANGAEA.902360 (2019).
43) Skeena, Can.20	43	United Nations Environment Programme. GEMStat database of the Global Environment Monitoring System for freshwater (GEMS/Water) Programme. International Centre for Water Resources and Global Change K. Accessed 16-11-2020. Available upon request from GEMS/Water Data Centre: gemstat.org, (2017).
44) Small boreal rivers in NW Russia40	44	Hollister AP, Whitby H, Seidel M, Lodeiro P, Gledhill M, Koschinsky A. Dissolved concentrations and organic speciation of copper in the Amazon River estuary and mixing plume. Marine Chemistry 234, 104005 (2021).
45) Snake6	45	N’kaya GDM, Orange D, Bayonne Padou SM, Datok P, Laraque A. Temporal Variability of Sediments, Dissolved Solids and Dissolved Organic Matter Fluxes in the Congo River at Brazzaville/Kinshasa. Geosciences 10, (2020).
46) St. Louis6	46	Wang X, Ma H, Li R, Song Z, Wu J. Seasonal fluxes and source variation of organic carbon transported by two major Chinese Rivers: The Yellow River and Changjiang (Yangtze) River. Global Biogeochemical Cycles 26, n/a-n/a (2012).
47) Tamar2	47	Laukert G, et al. Transport and transformation of riverine neodymium isotope and rare Earth element signatures in high latitude estuaries: A case study from the Laptev Sea. Earth Planet Sci Lett 477, 205-217 (2017).
48) Tennessee6	48	Juhls B, et al. Identifying Drivers of Seasonality in Lena River Biogeochemistry and Dissolved Organic Matter Fluxes. Frontiers in Environmental Science 8, (2020).
Global river discharge	49	Goldstein SJ, Jacobsen SB. REE in the Great Whale River estuary, northwest Quebec. Earth Planet Sci Lett 88, 241-252 (1988).
49) Global river discharge6	50	Guéguen C, Granskog MA, McCullough G, Barber DG. Characterisation of colored dissolved organic matter in Hudson Bay and Hudson Strait using parallel factor analysis. Journal of Marine Systems 88, 423-433 (2011).
50) River discharge41	51	Huguet A, Vacher L, Relexans S, Saubusse S, Froidefond JM, Parlanti E. Properties of fluorescent dissolved organic matter in the Gironde Estuary. Organic Geochemistry 40, 706-719 (2009).
Global river discharge and pH datasets	52	Burnett WC, et al. Groundwater-derived nutrient inputs to the Upper Gulf of Thailand. Continental Shelf Research 27, 176-190 (2007).
51) River pH dataset GLORICH42	53	Miller A. Seasonal investigations of dissolved organic carbon dynamics in the Tamar Estuary, UK. Estuarine, Coastal and Shelf Science 49, 891-908 (1999).
52) River pH dataset GEMSTAT43	54	Yan L, Stallard RF, Key RM, Crerar DA. The chemical behavior of trace metals and 226Ra during estuarine mixing in the Mullica River estuary, New Jersey, USA: a comparison between field observation and equilibrium calculation. Chem Geol 85, 369-381 (1990).
Maximum Nd removal fraction with pH and dissolved organic carbon data	55	Niloy NM, Haque MM, Tareq SM. Temporal changes in hydrochemistry and DOM characteristics of the Brahmaputra River: implication to the seasonality of water quality. Environ Sci Pollut Res Int 29, 35165-35178 (2022).
53) Amazon4, 44	56	Depetris PJ, Paolini JE. Biogeochemical aspects of South American rivers: the Paraná and the Orinoco. In: Biogeochemistry of major world rivers. SCOPE 42) (1991).
54) Congo12, 13, 45
55) Changjiang7, 8, 46
56) Pará44
57) Lena30, 47, 48
58) Fly17, 18
59) Sepik4, 17
60) Great Whale6, 49, 50
61) Gironde22, 23, 51
62) Chao Phraya9, 10, 52
63) Tamar2, 53
64) Mullica2, 54
Global river discharge and dissolved organic carbon (DOC) datasets
65) River DOC dataset GLORICH42
66) River DOC dataset GEMSTAT43
67) Congo River45
68) Brahmaputra River55
69) Rio Parana56
